# Supplementary material for: A phase III randomized crossover trial of plerixafor versus G-CSF for treatment of WHIM syndrome
Source: PubMed Central journal article supplement (PMC10541188; doi:10.1172/jci164918), 2023-10-02
Supplement: jci-133-164918-s100.pdf [file jci-133-164918-s100.pdf]

# M01 L sole Acetyl Salicylic Acid pretreatment (5/2014→3/2015)

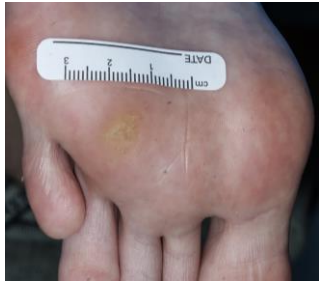

5/2014

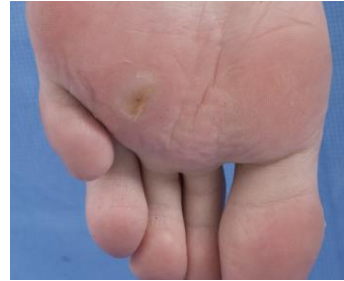

G d0 2/4/15

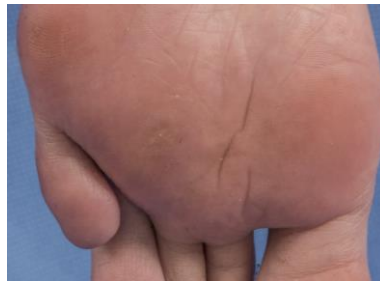

G M0

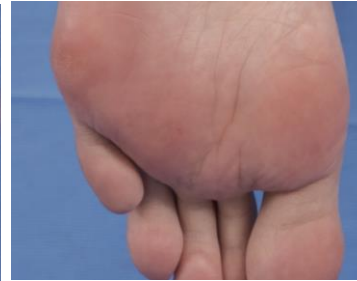

G M4

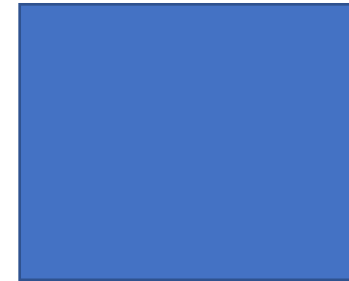

G M8

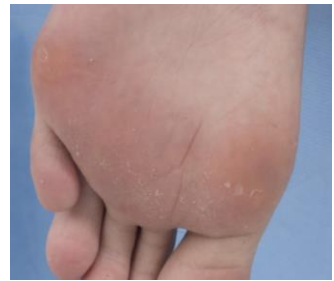

G M12

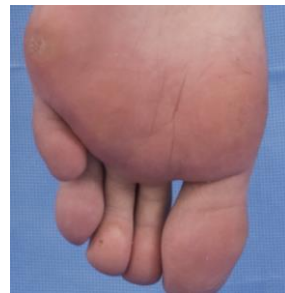

P M0

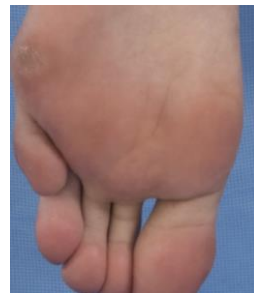

P M4

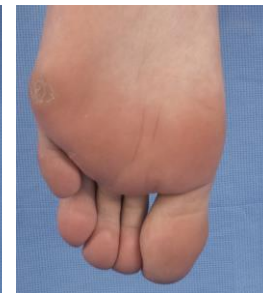

P M8

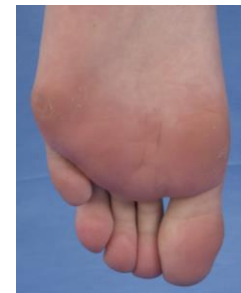

P M12

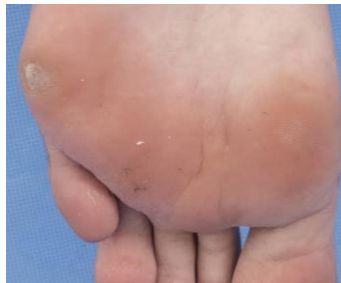

1/2018

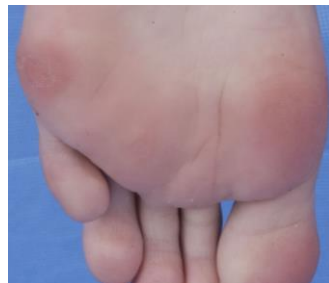

10/2019

# M01 Forehead

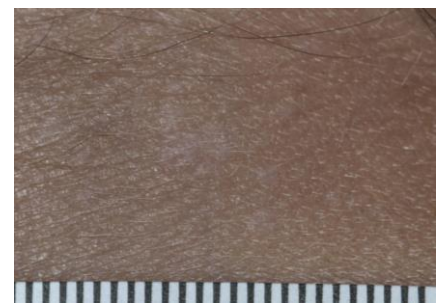

5/2014

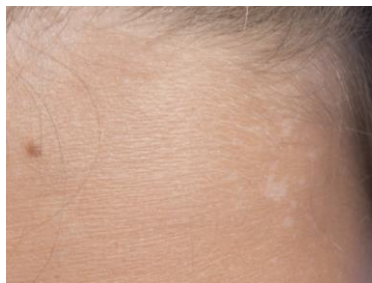

G d0  
10/14/14

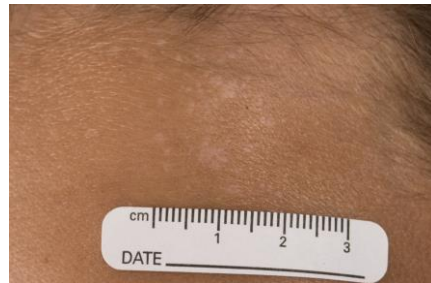

G M0

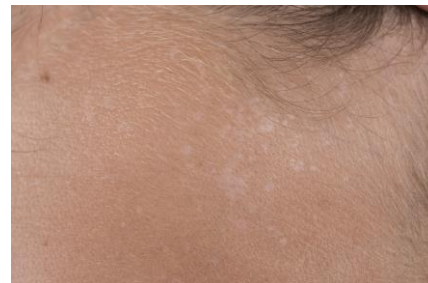

G M4

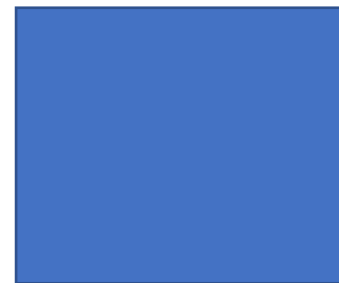

G M8

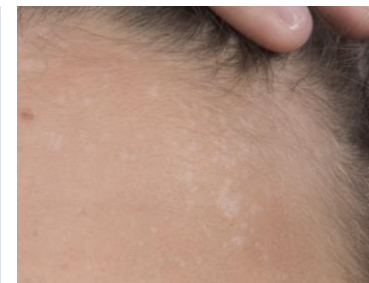

G M12

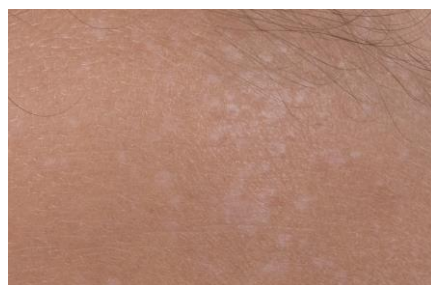

P M0

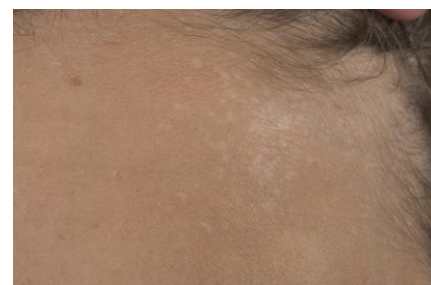

P M4

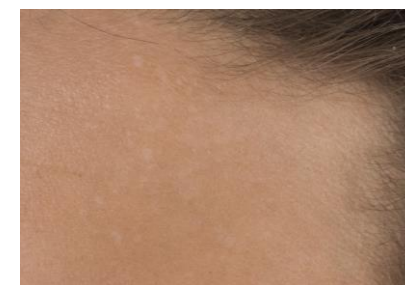

P M8

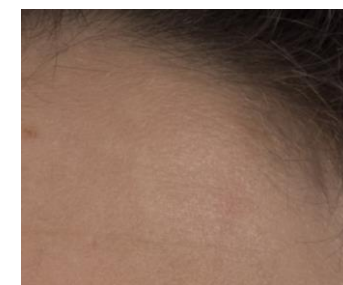

P M12

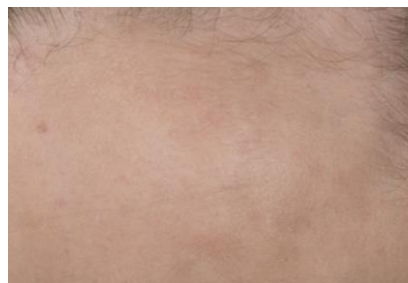

1/2018

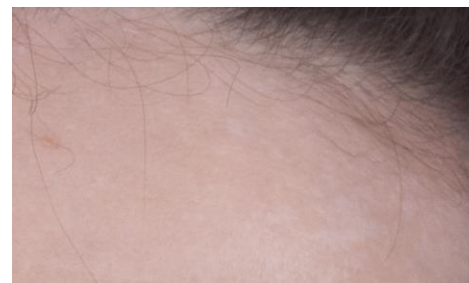

10/2018

# M01 Right sole

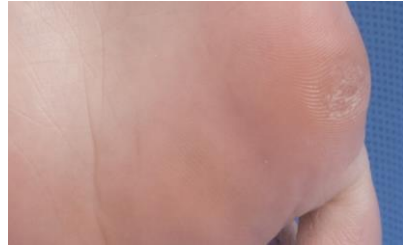

G d0

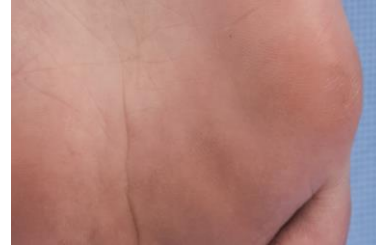

G M0

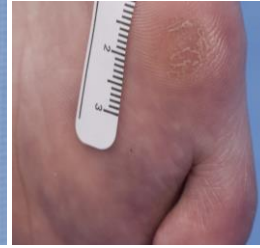

G M4

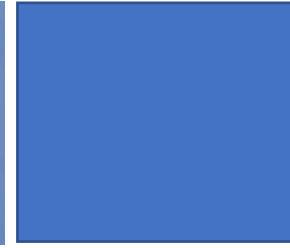

G M8

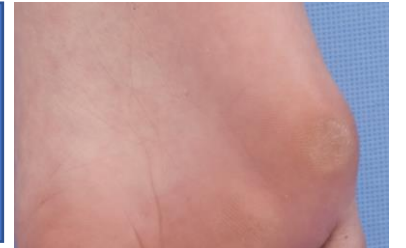

G M12

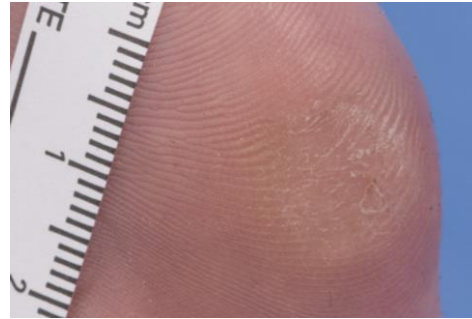

P M0

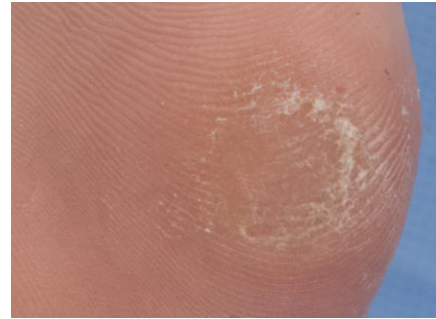

P M4

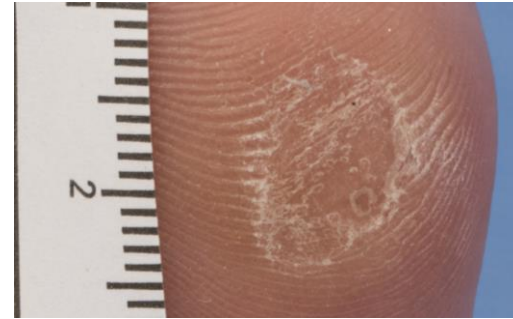

P M8

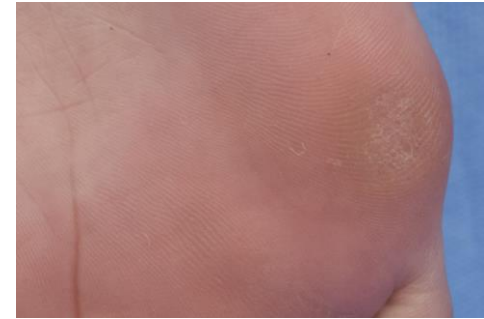

P M12

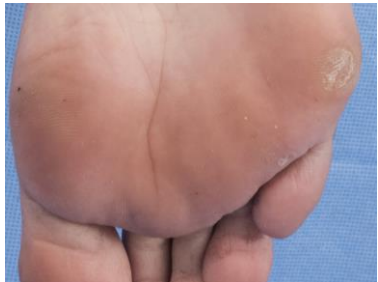

1/2018

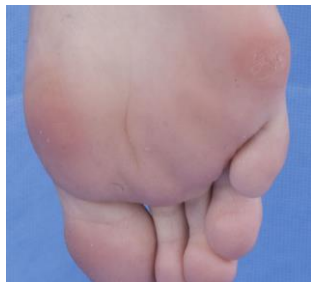

10/2019

# M02 Right palm

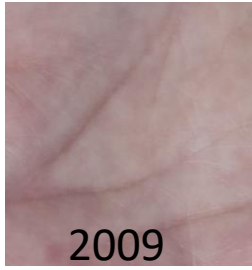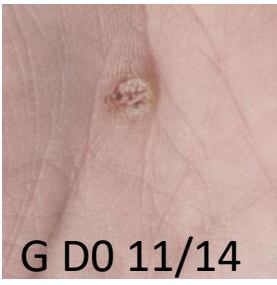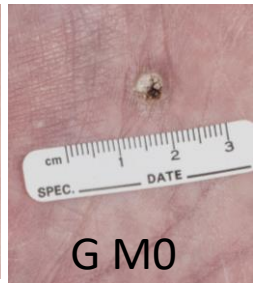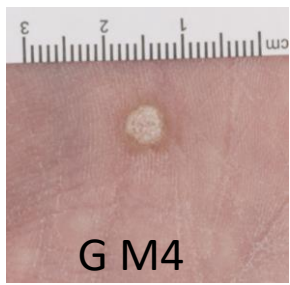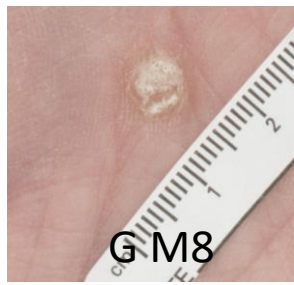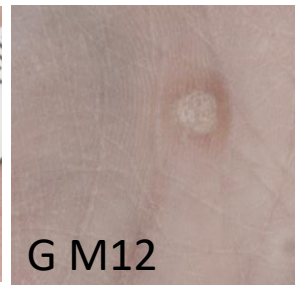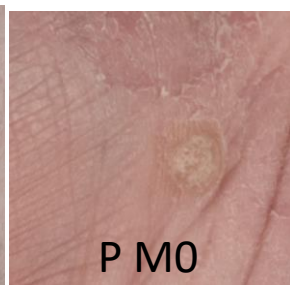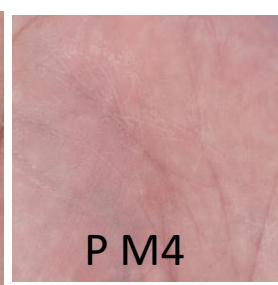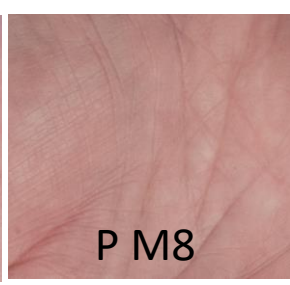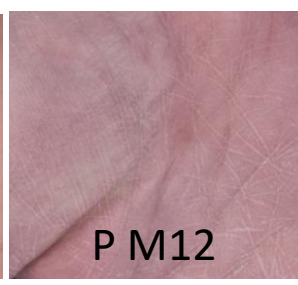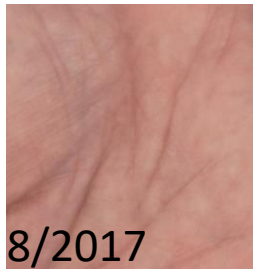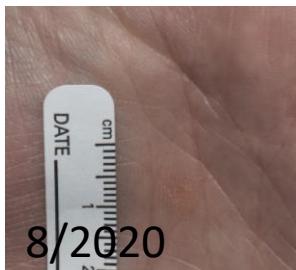

# M02 Right hand, finger 2, PIP and DIP joints

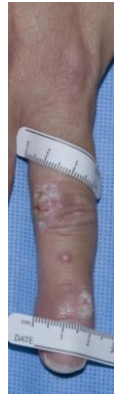

8/09

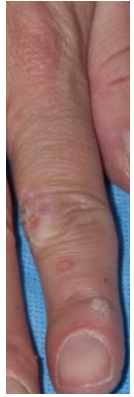

8/10

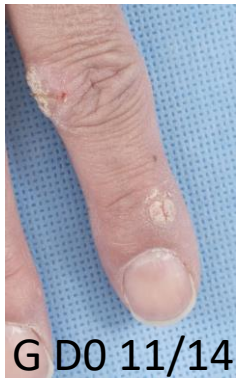

G D0 11/14

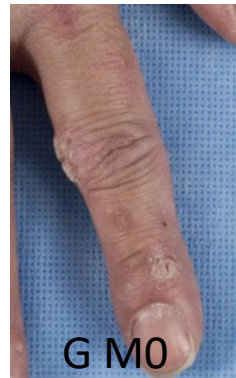

G M0

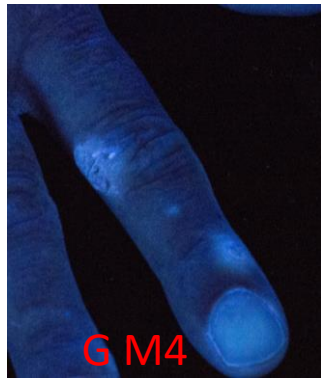

G M4

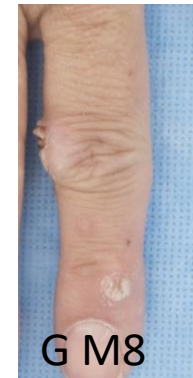

G M8

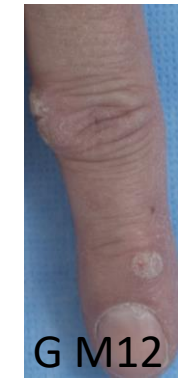

G M12

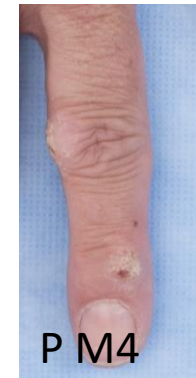

P M4

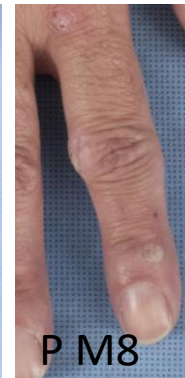

P M8

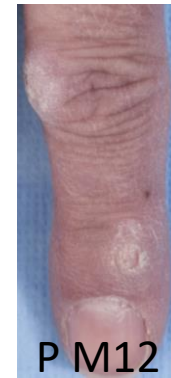

P M12

3/17

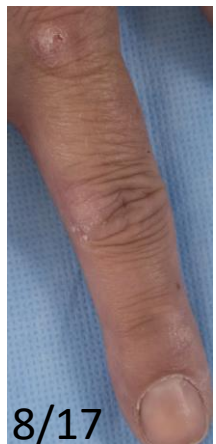

8/17

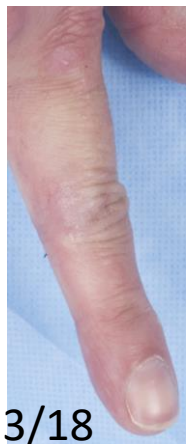

3/18

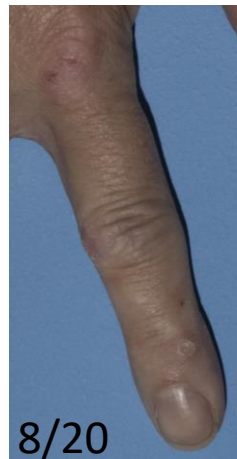

8/20

# M02 Right hand, finger 5, DIP joint

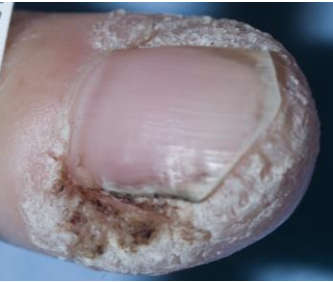

1/09

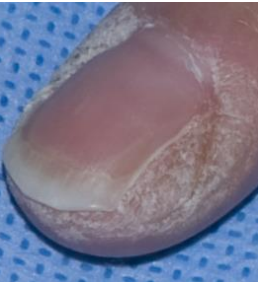

8/09

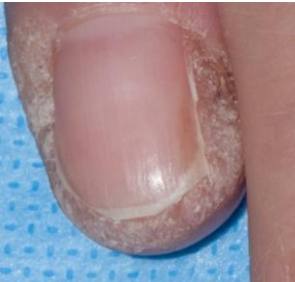

8/10

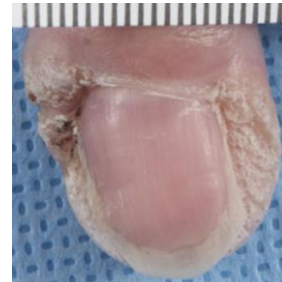

G d0

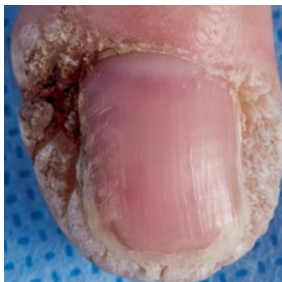

G M0

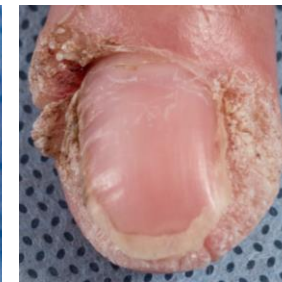

G M4

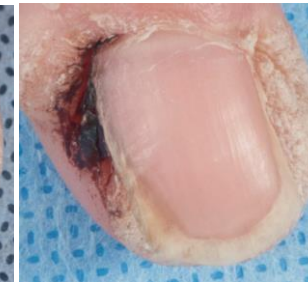

G M8

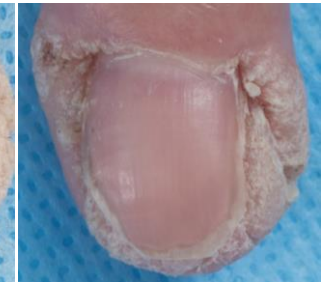

G M12

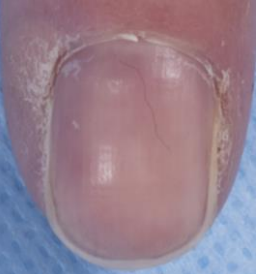

3/18

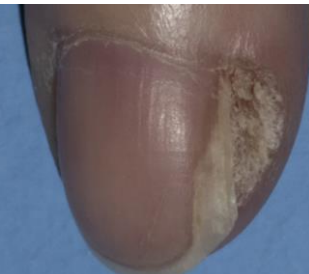

8/20

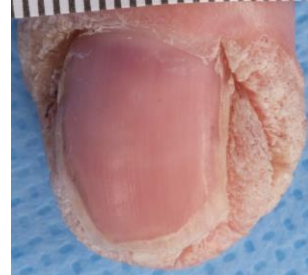

P M0

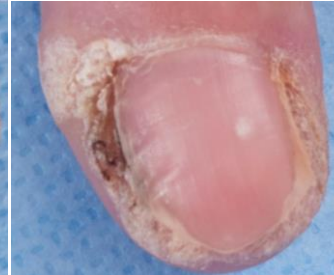

P M4

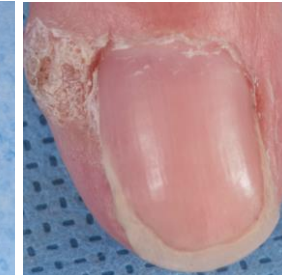

P M8

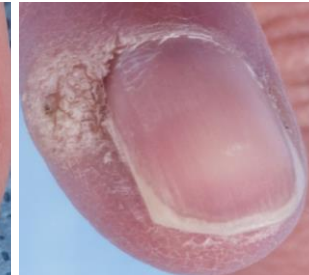

P M12

# M02 Left hand, finger 5, DIP region

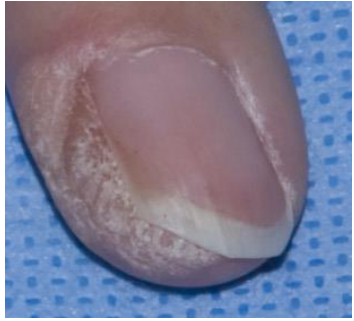

8/09

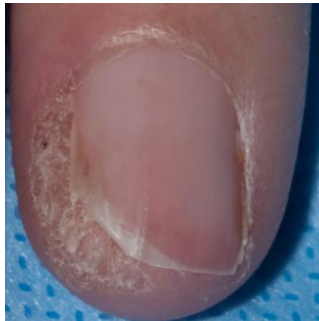

8/10

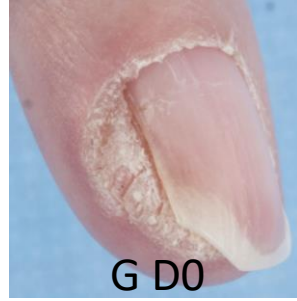

G D0

11/14

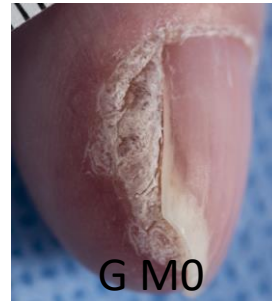

G M0

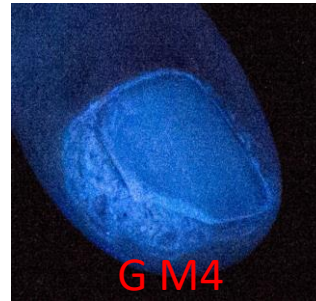

G M4

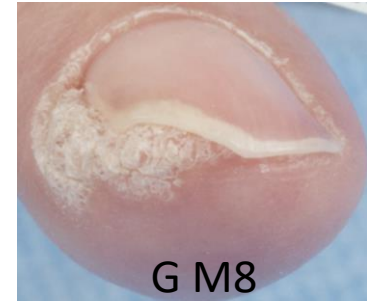

G M8

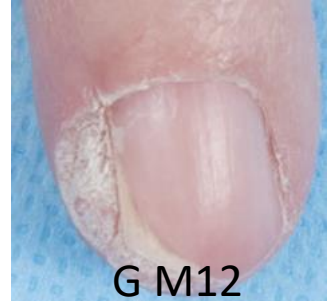

G M12

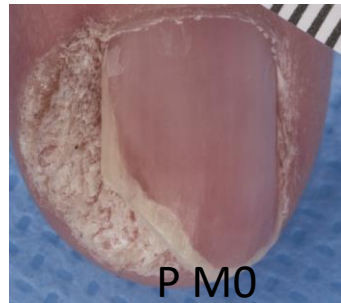

P M0

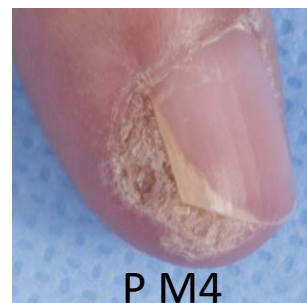

P M4

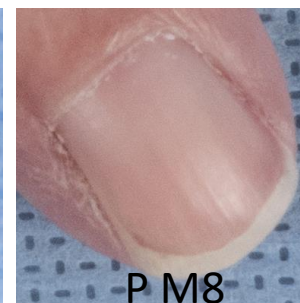

P M8

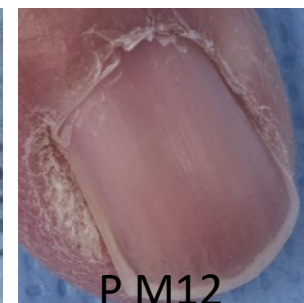

P M12

3/17

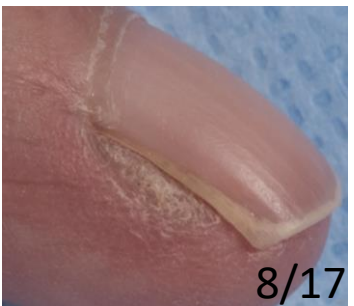

8/17

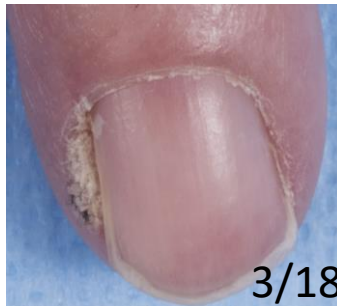

3/18

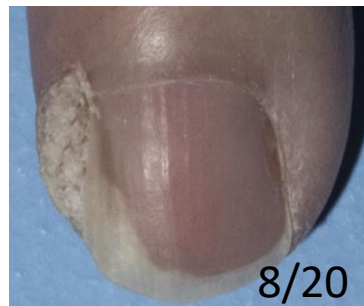

8/20

# M02 Left knee, posterior

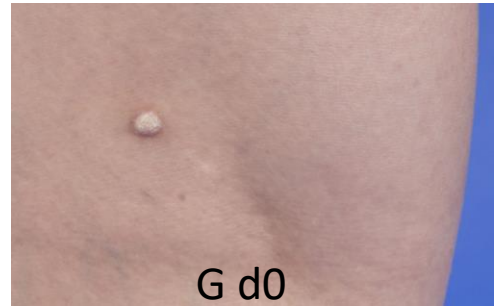

G d0

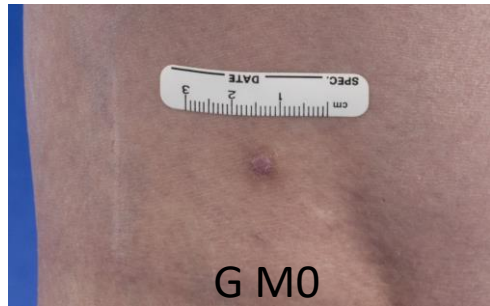

G M0

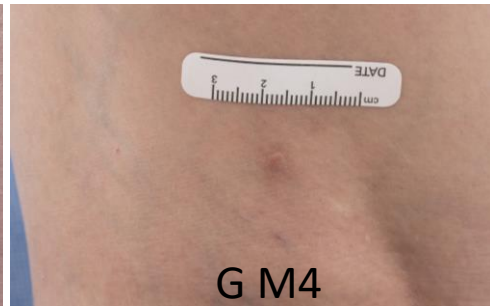

G M4

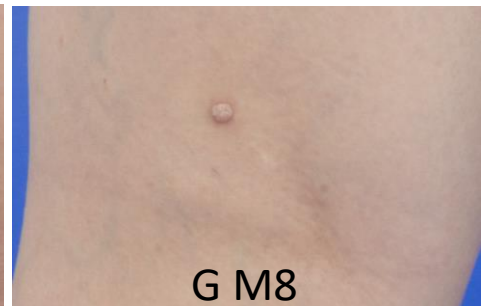

G M8

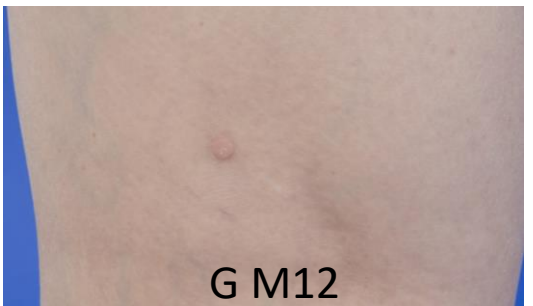

G M12

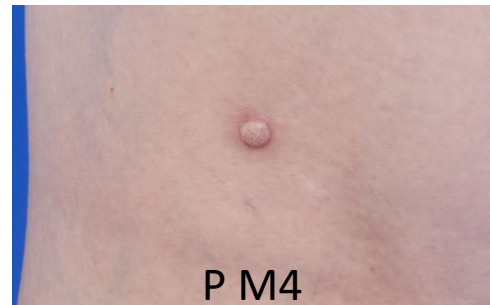

P M4

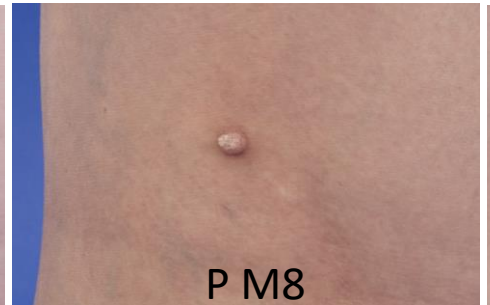

P M8

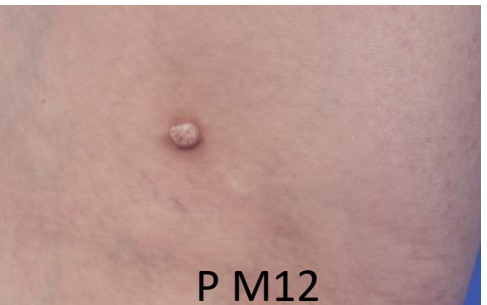

P M12

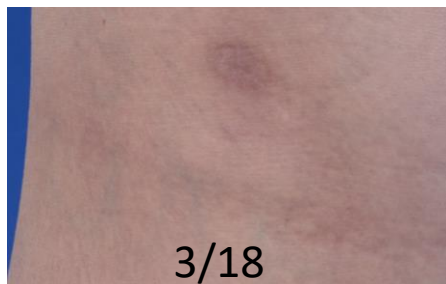

3/18

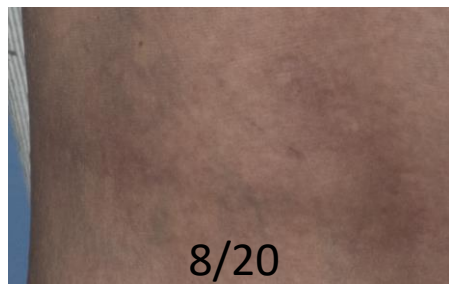

8/20



# M02 Left hand, finger 2, DIP region

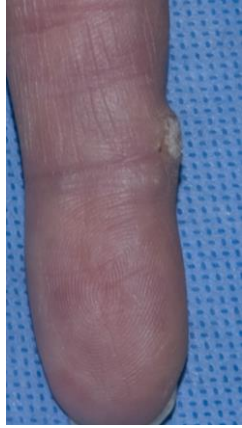

8/2009

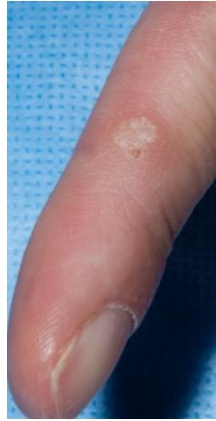

8/2010

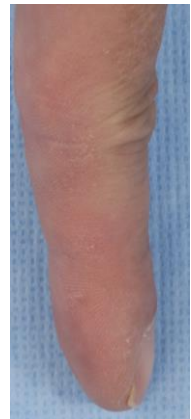

8/2017

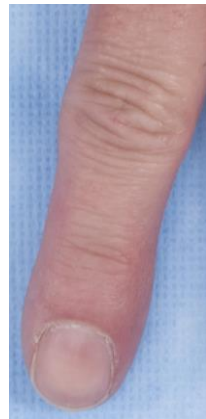

3/2018

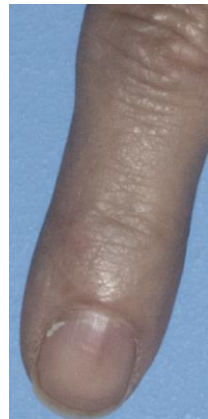

8/2020

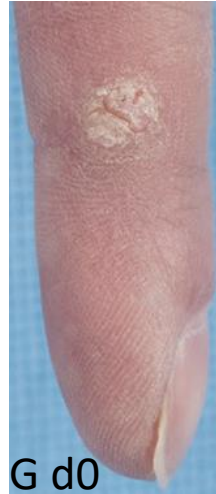

G d0

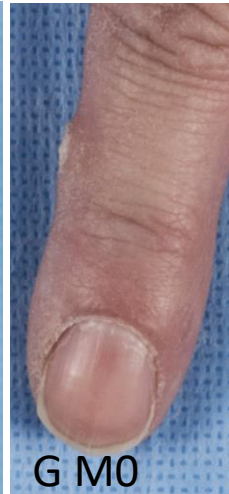

G M0

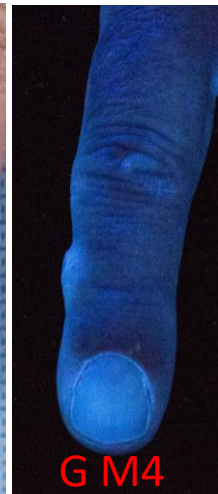

G M4

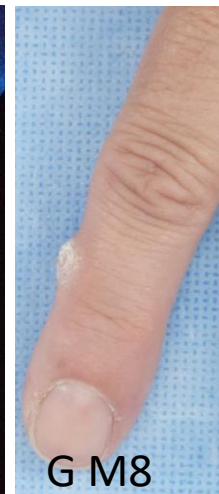

G M8

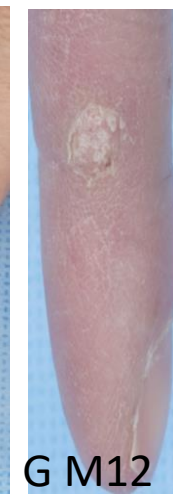

G M12

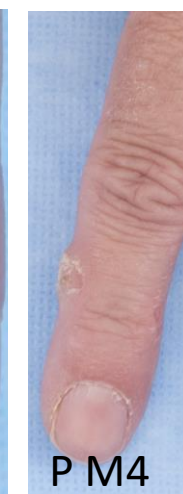

P M4

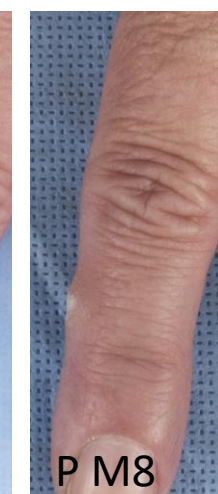

P M8

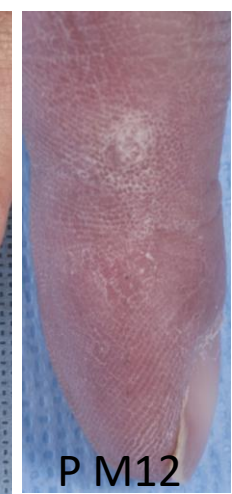

P M12

# M02 Left great toe

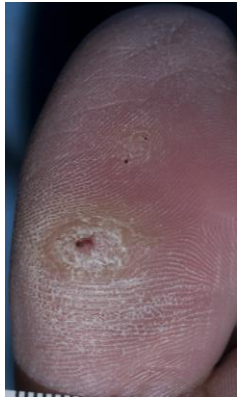

2009

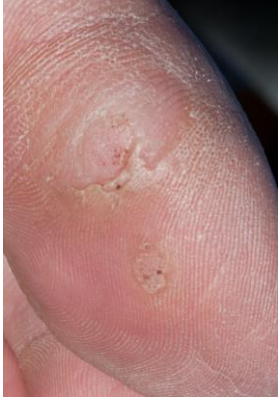

2010

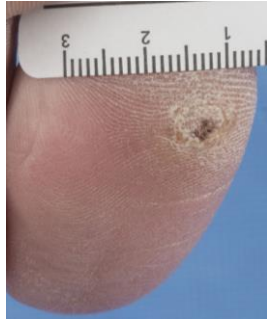

G d0

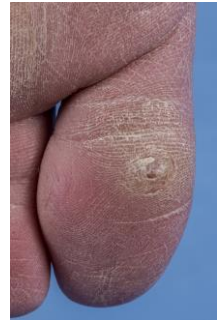

G M0

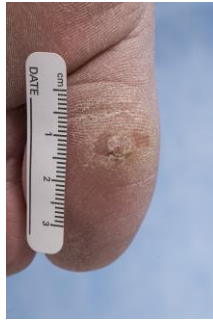

G M4

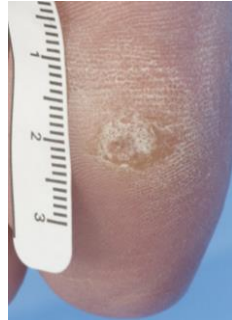

G M8

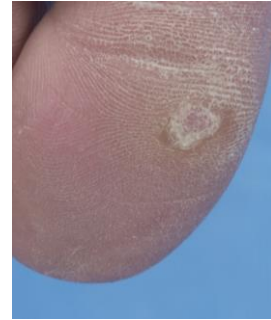

G M12

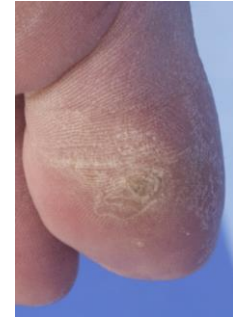

P M4

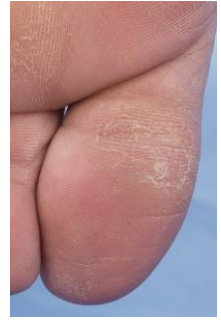

P M8

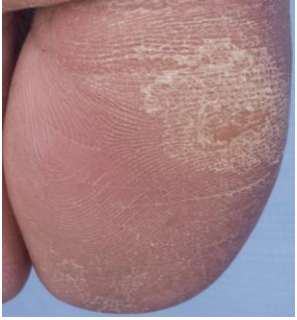

P M12

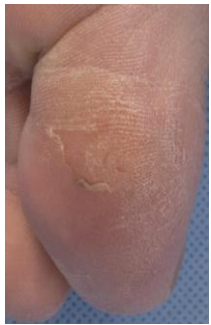

8/2017

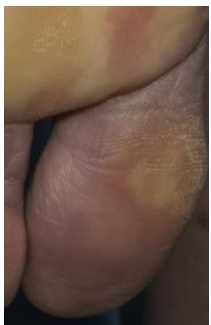

8/2020

# M02 Right great toe

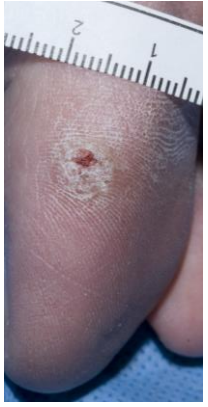

2009

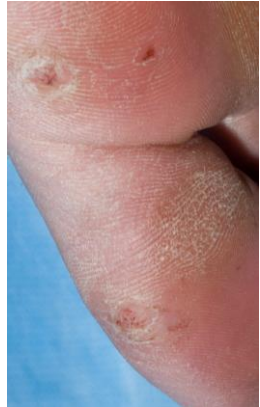

2010

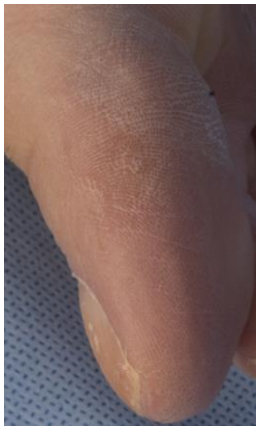

8/2017

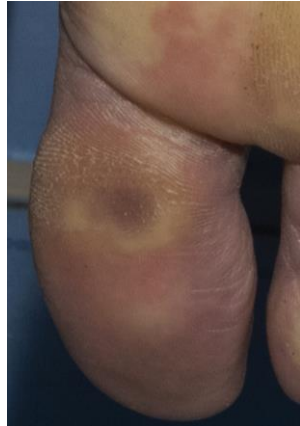

8/2020

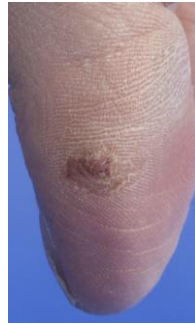

G d0

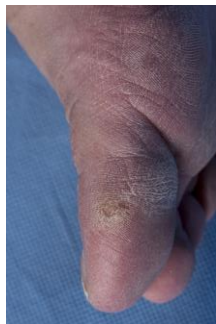

G M0

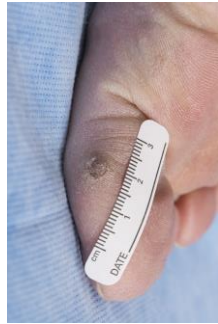

G M4

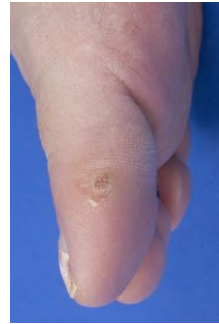

G M8

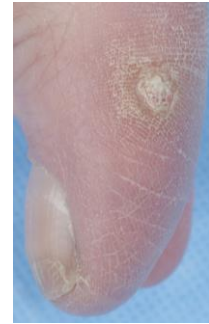

G M12

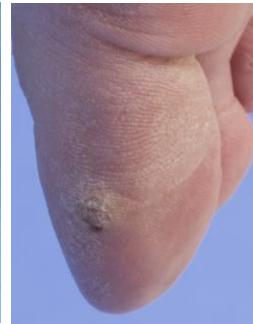

P M4

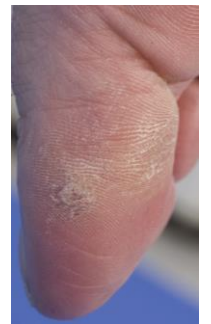

P M8

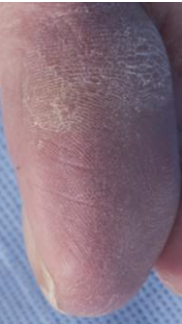

P M12

# M03 Right knee

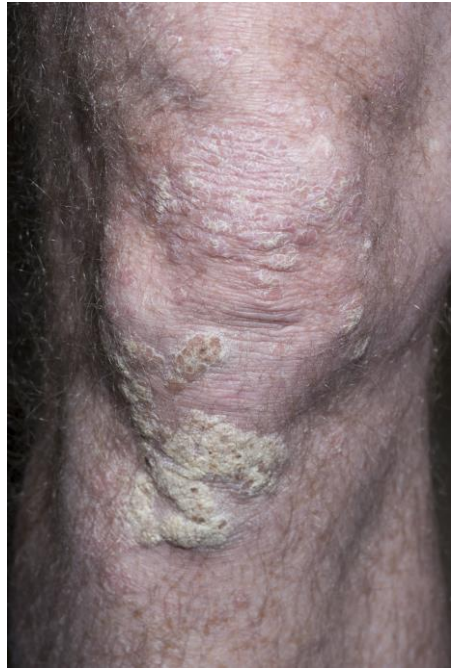

2012

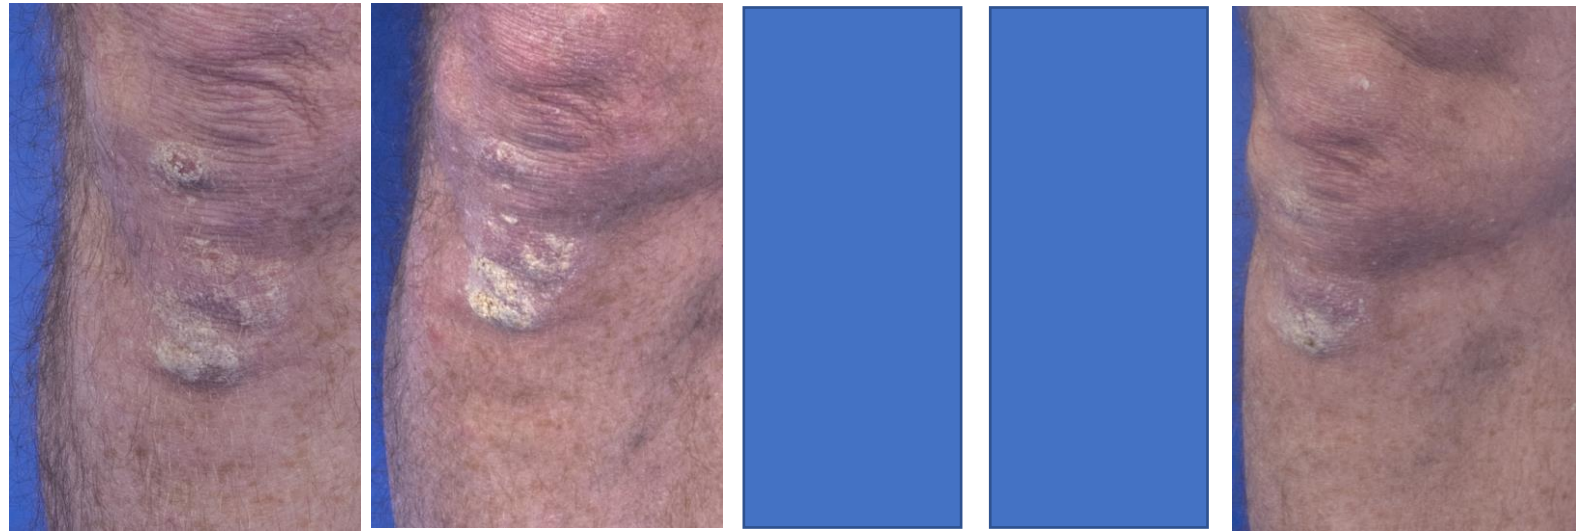

P d0 11/12/14

P M0

P M4

P M8

P M12

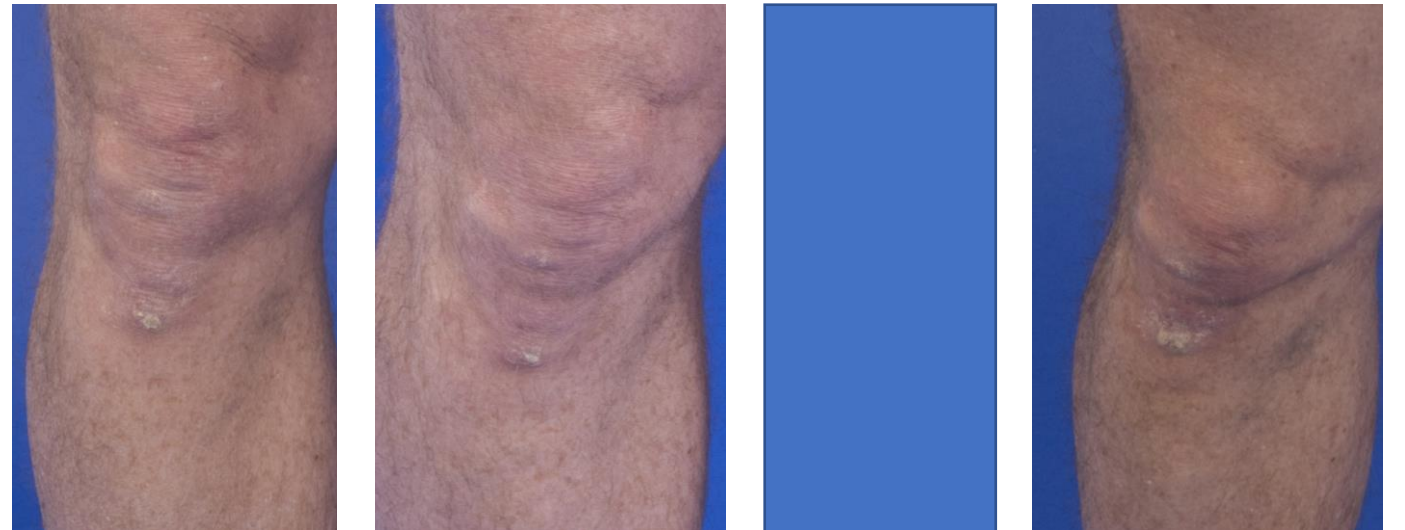

G M0

G M4

G M8

G M12

# M03 Right elbow

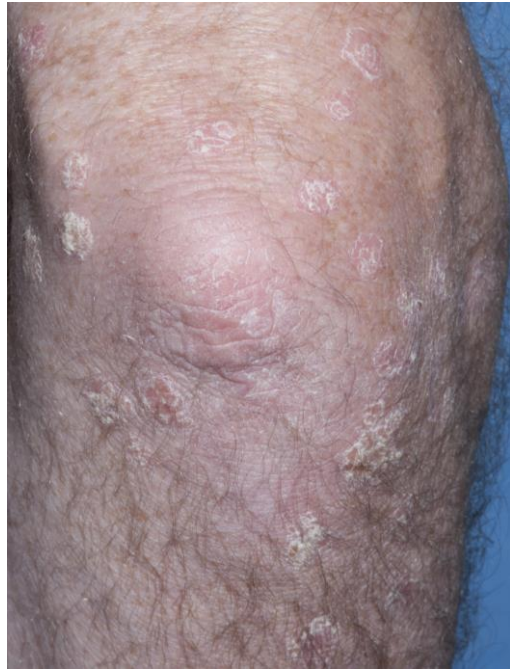

2012

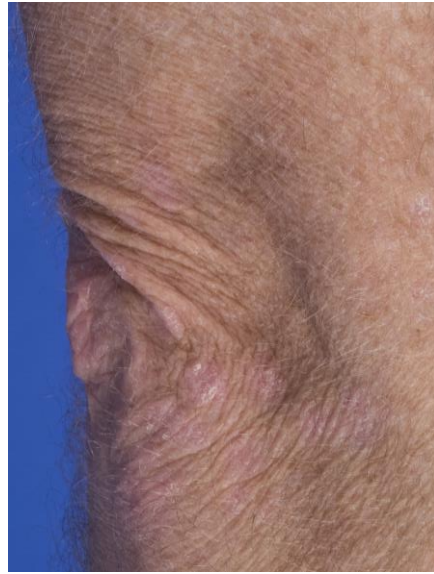

P d0

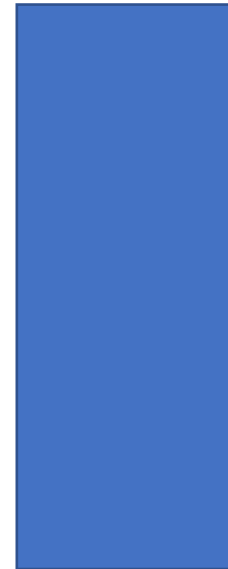

P M0

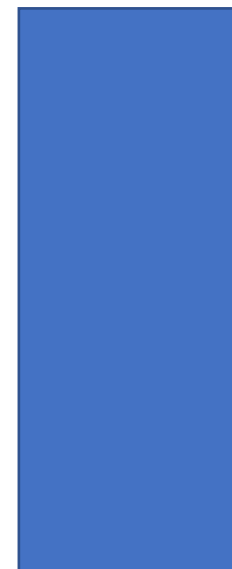

P M4

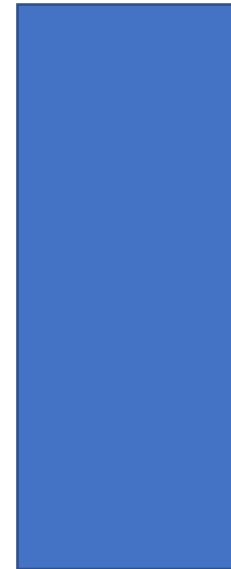

P M8

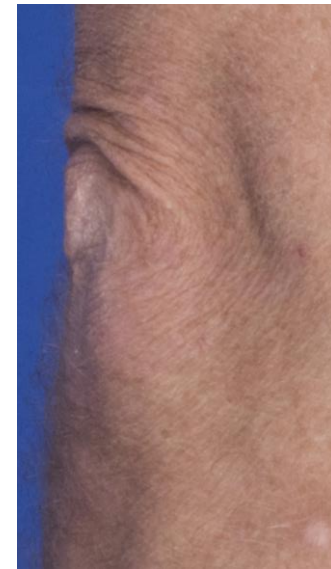

P M12

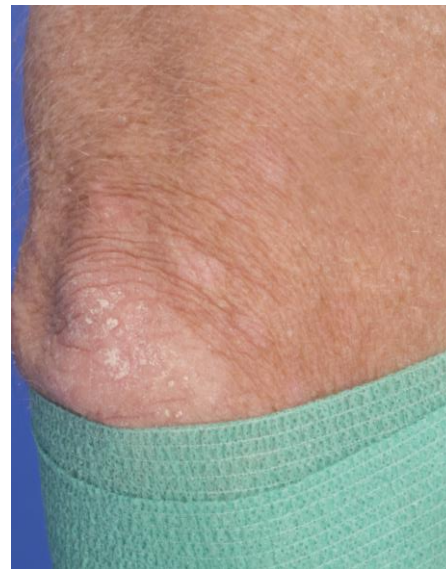

G M0

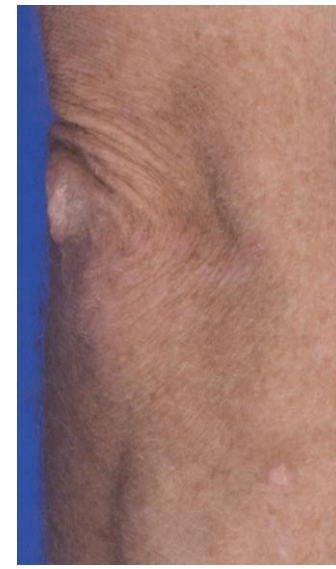

G M4

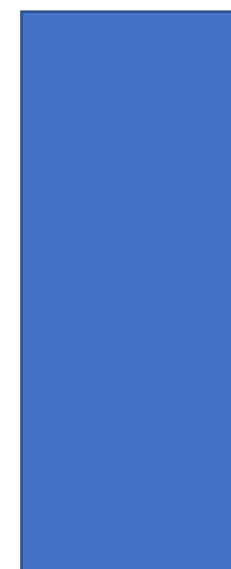

G M8

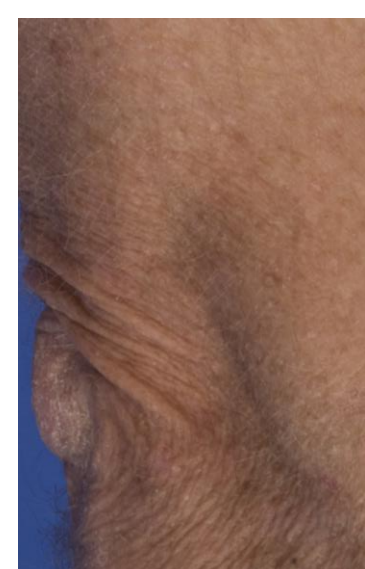

G M12

# M03 Right foot, dorsum

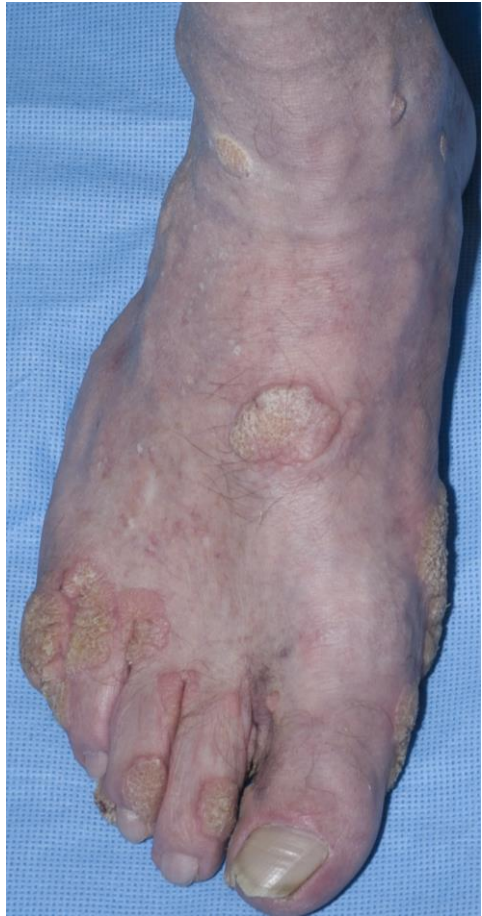

2012

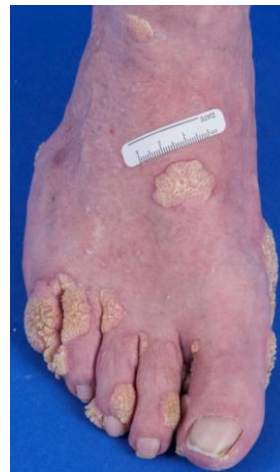

P d0  
11/12/14

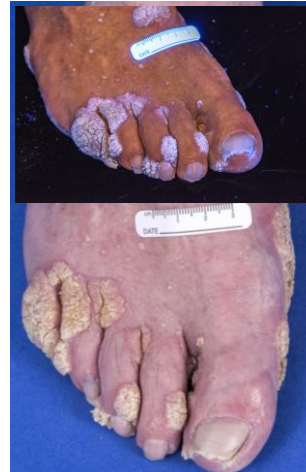

P M0

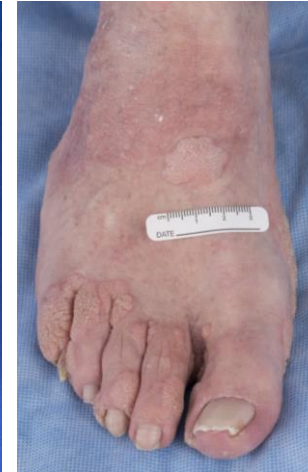

P M4

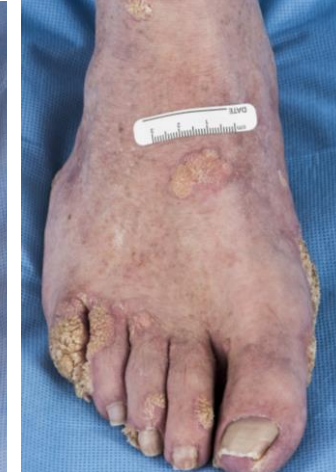

P M8

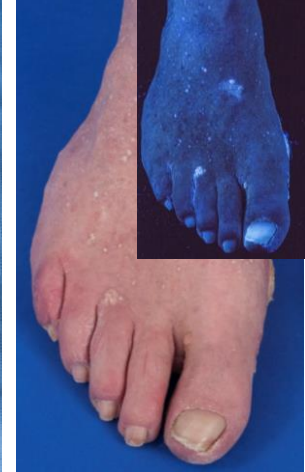

P M12

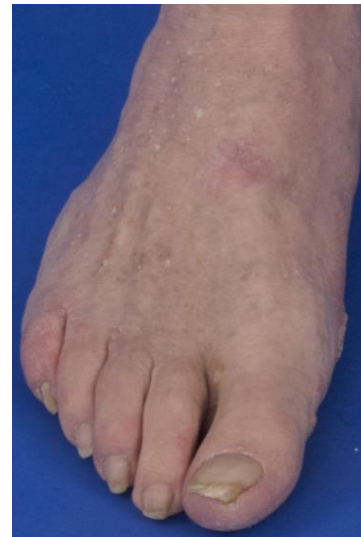

G M0

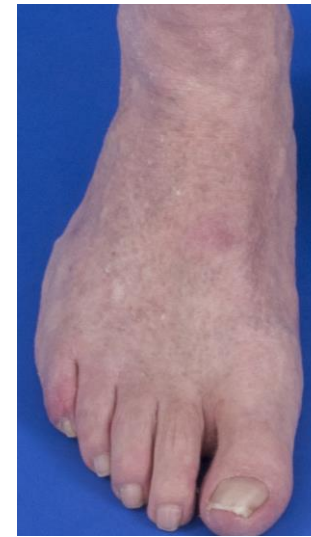

G M4

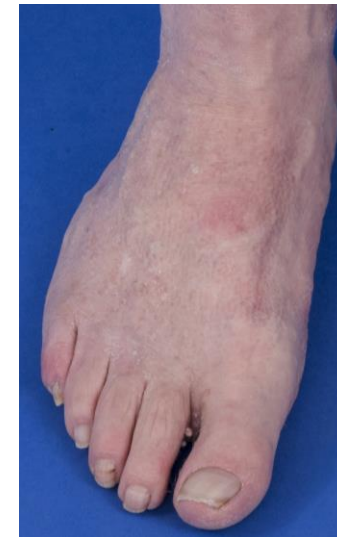

G M8

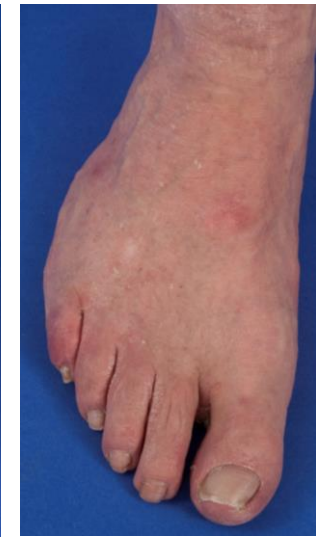

G M12

# M03 Right plantar area

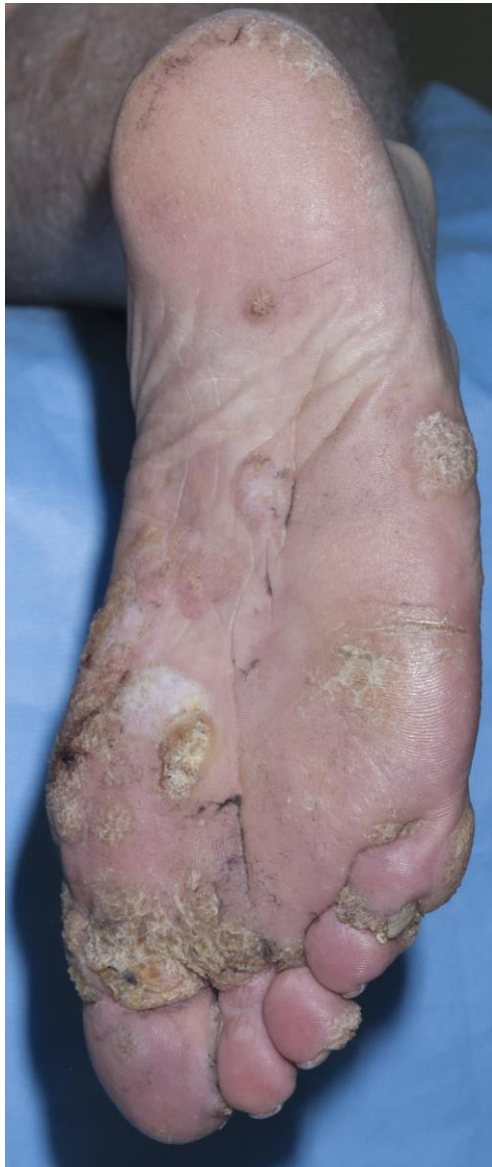

2/2012

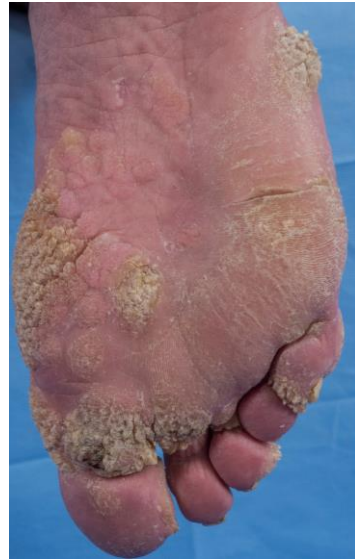

P d0  
11/12/14

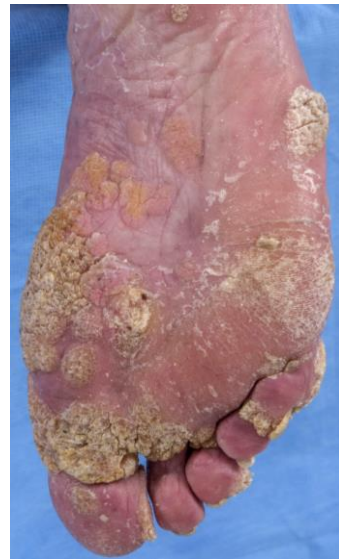

P M0

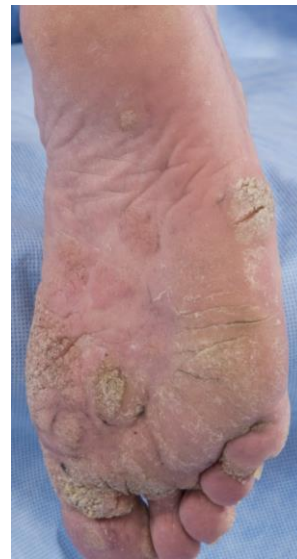

P M4

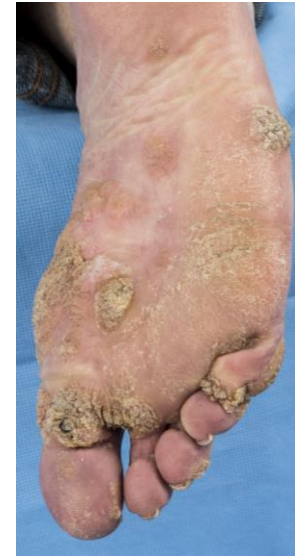

P M8

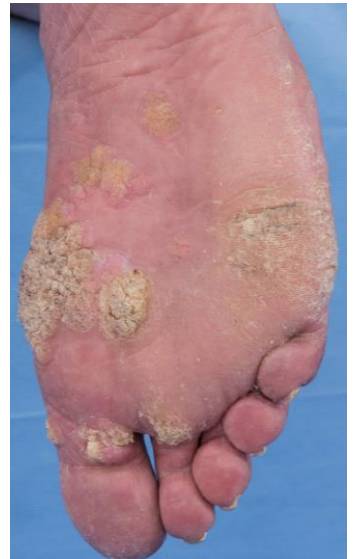

P M12

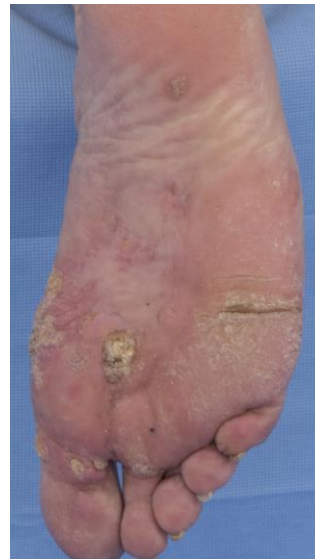

G M0

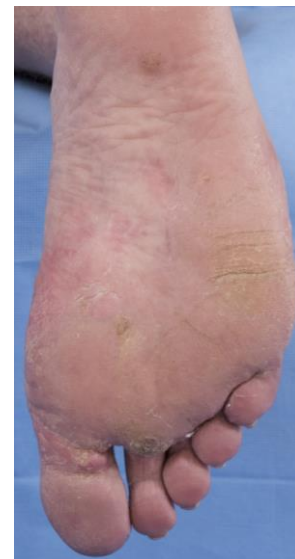

G M4

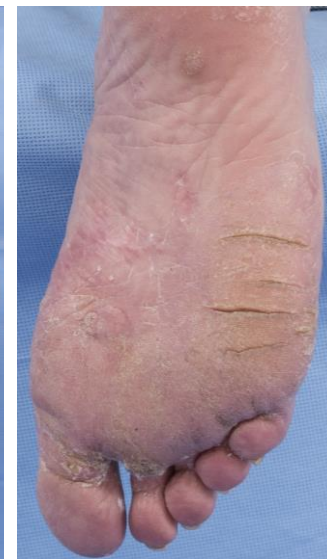

G M8

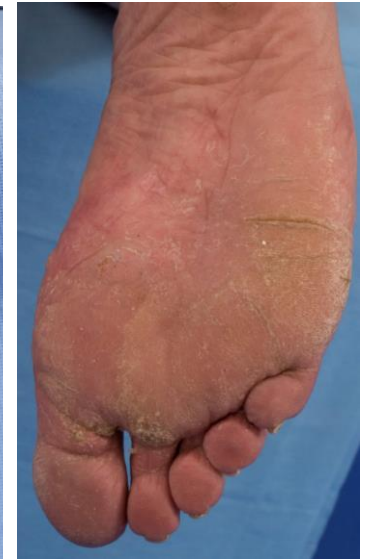

G M12

# M03 Left foot dorsum

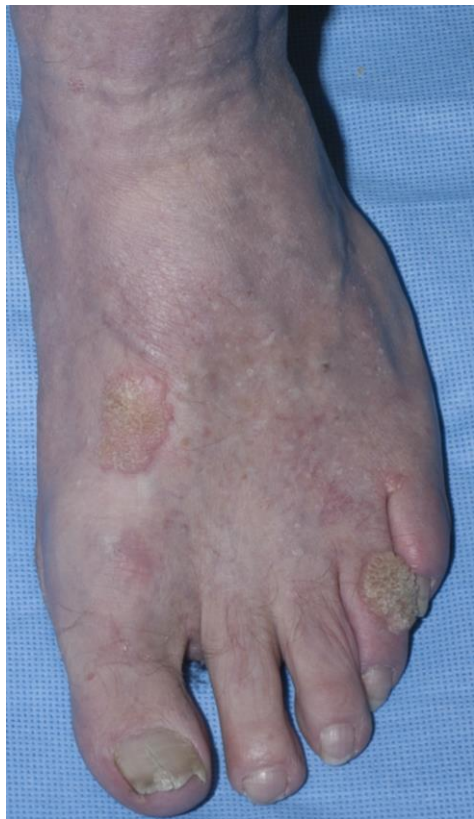

2012

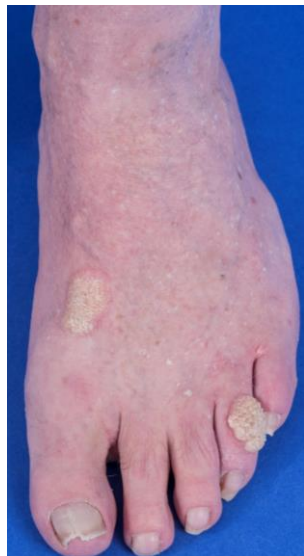

P d0  
11/12/14

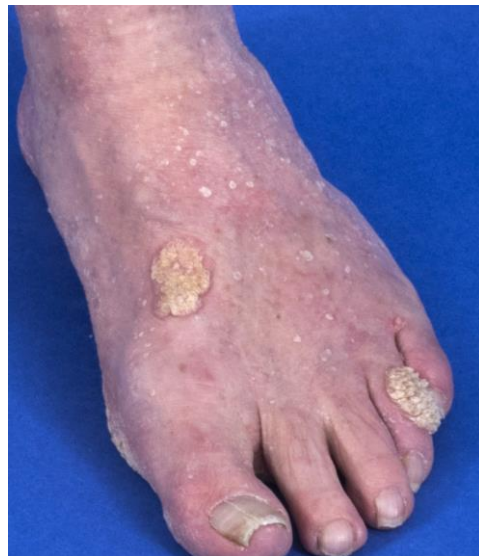

P M0

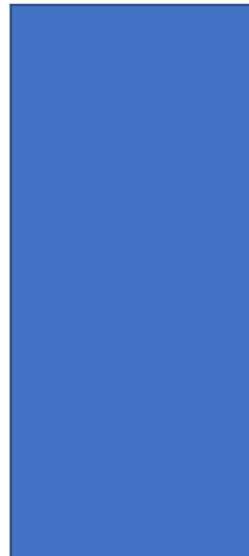

P M4

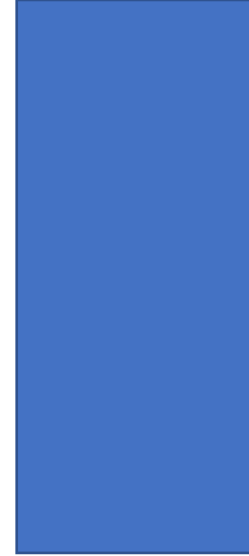

P M8

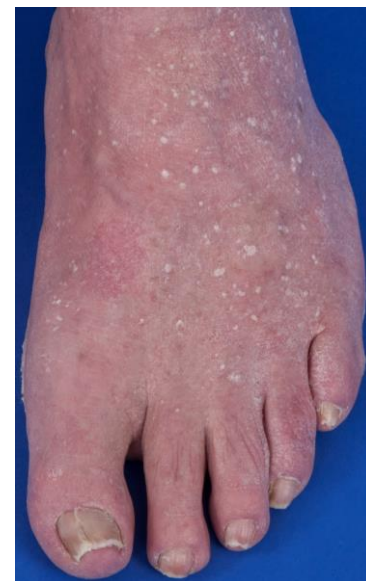

P M12

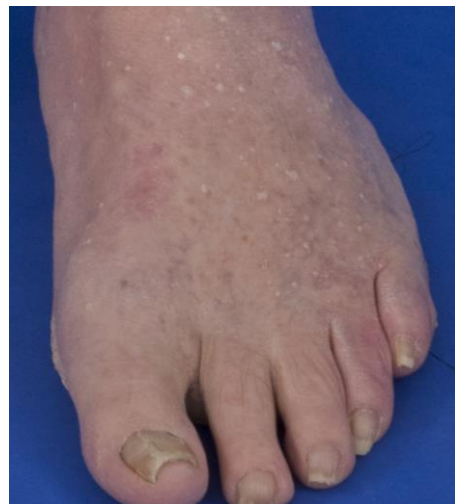

G M0

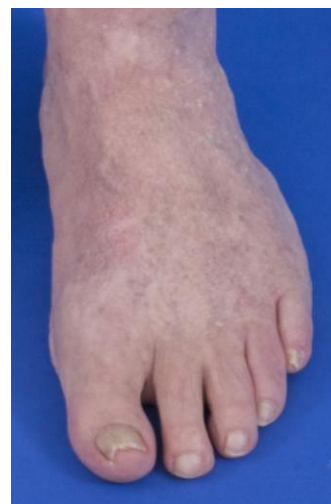

G M4

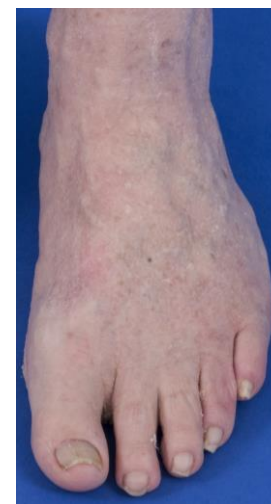

G M8

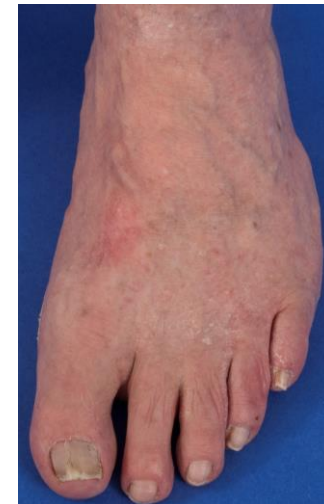

G M12



# M03 Left foot

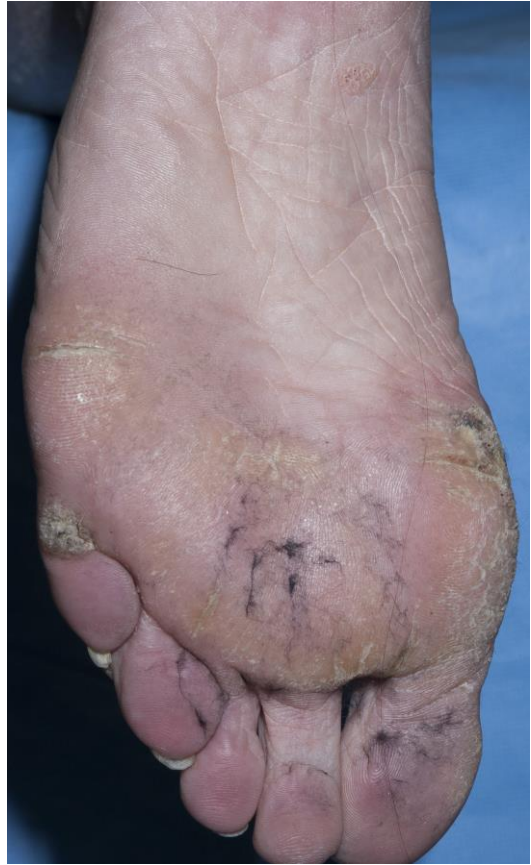

2012

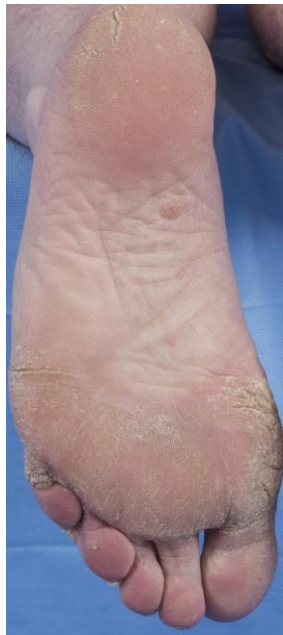

P d0

11/12/14

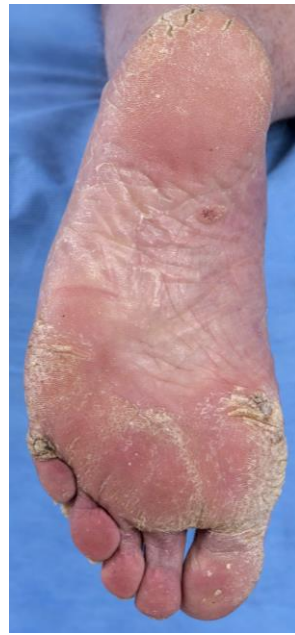

P M0

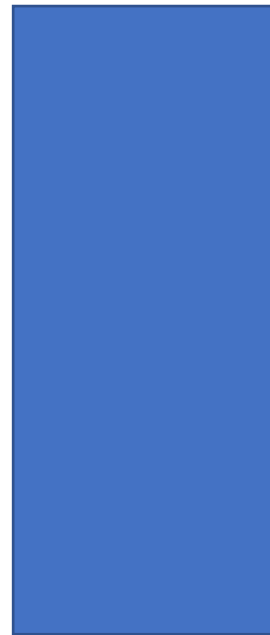

P M4

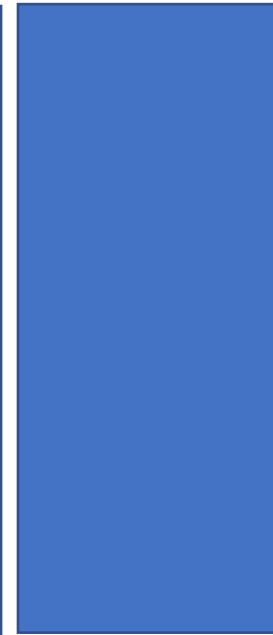

P M8

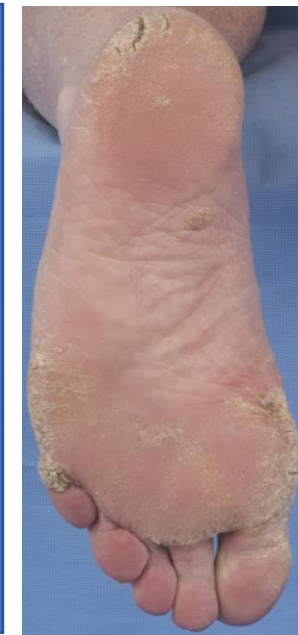

P M12

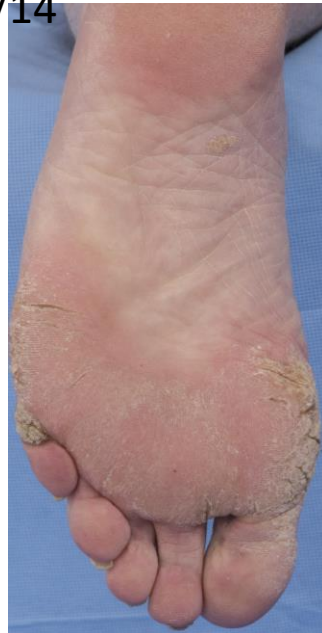

G M0

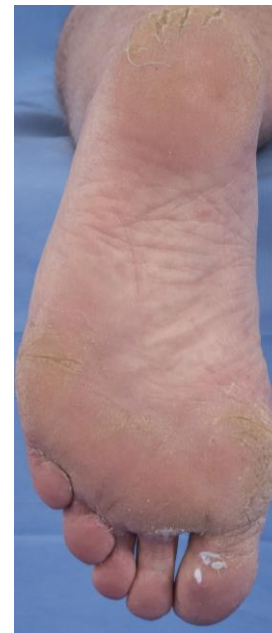

G M4

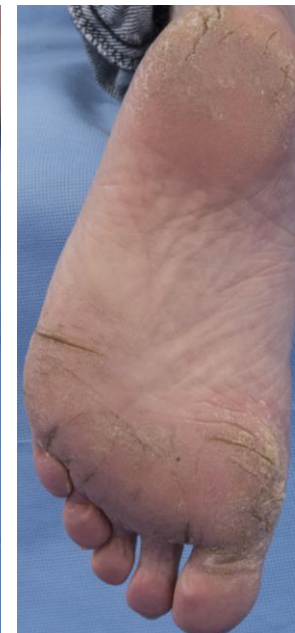

G M8

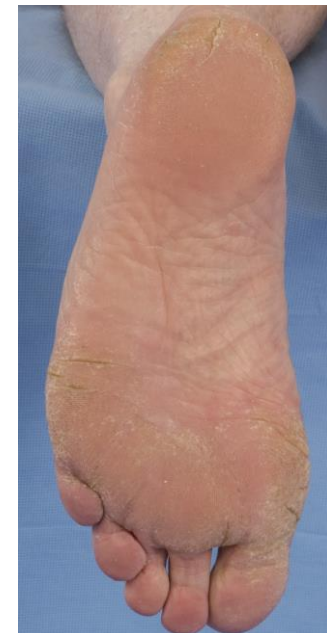

G M12

# M03 Left Achilles tendon

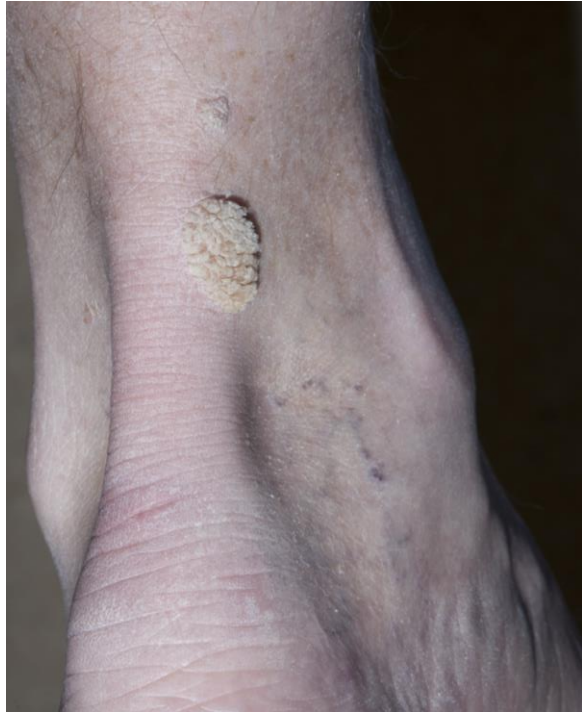

2012

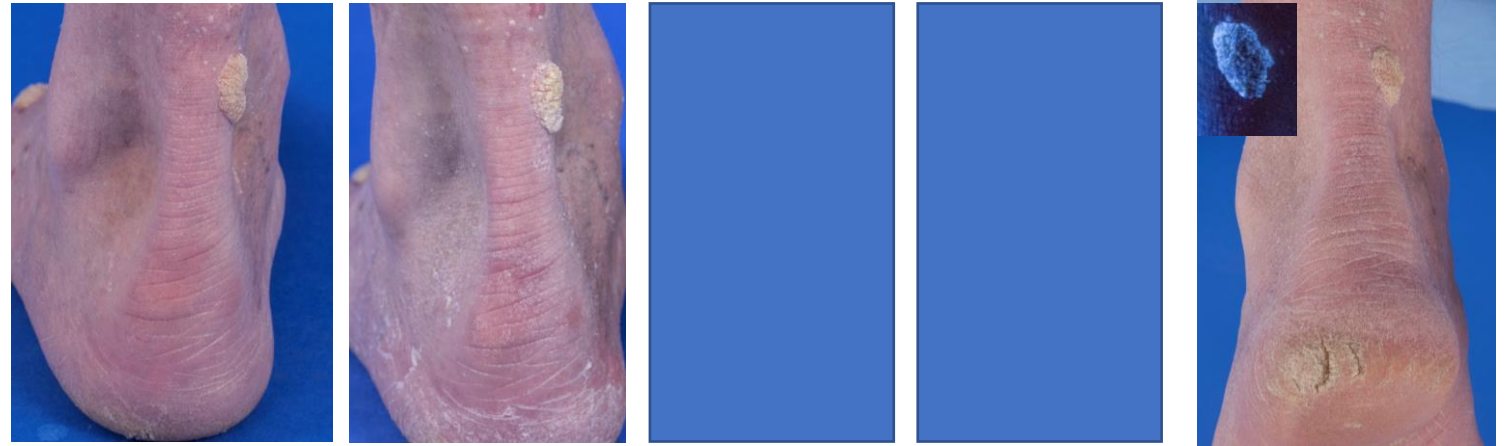

P d0  
11/12/14

P M0

P M4

P M8

P M12

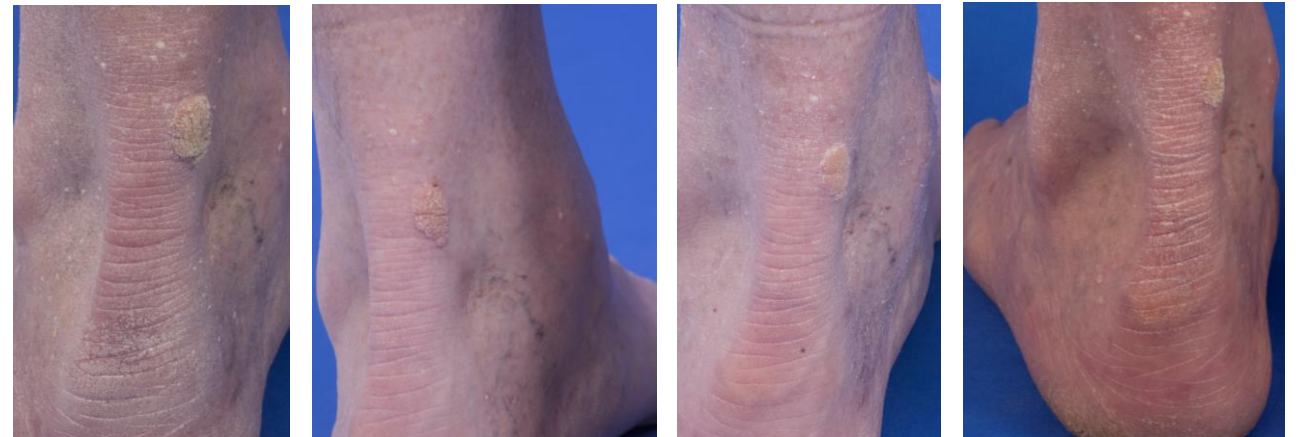

G M0

G M4

G M8

G M12

# M03 Right Hand, Finger 4, PIP and DIP region

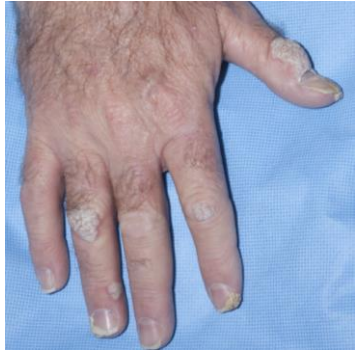

2012

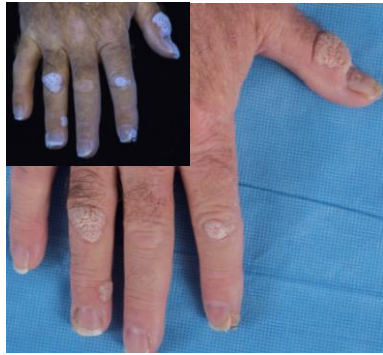

P d0  
11/12/14

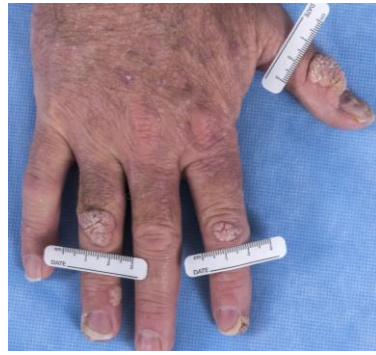

P M0

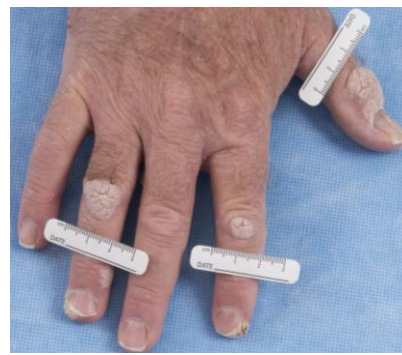

P M4

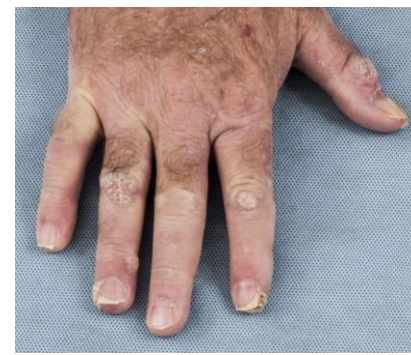

P M8

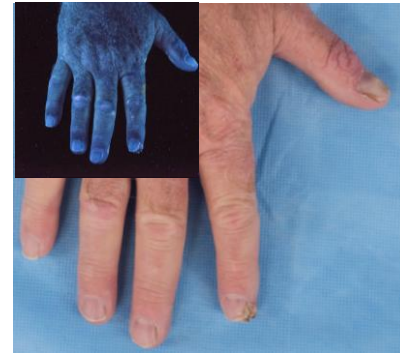

P M12

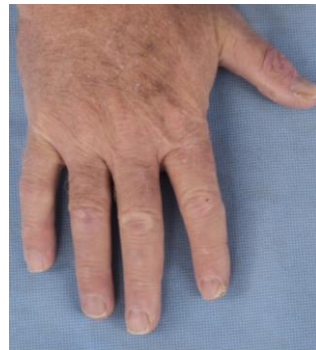

G M0

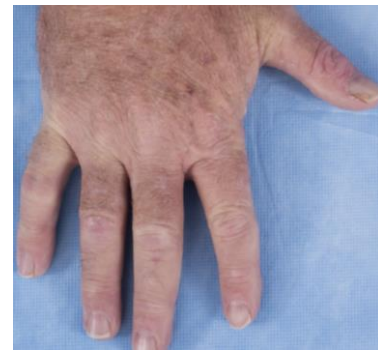

G M4

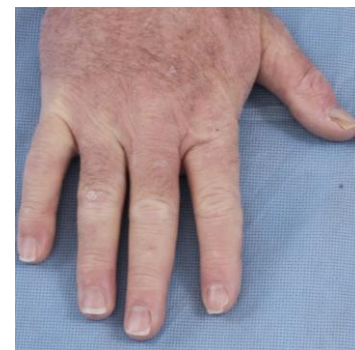

G M8

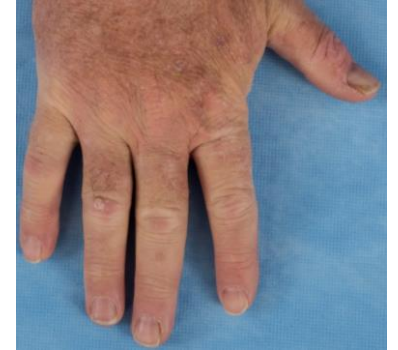

G M12

# M03

## Right Thumb

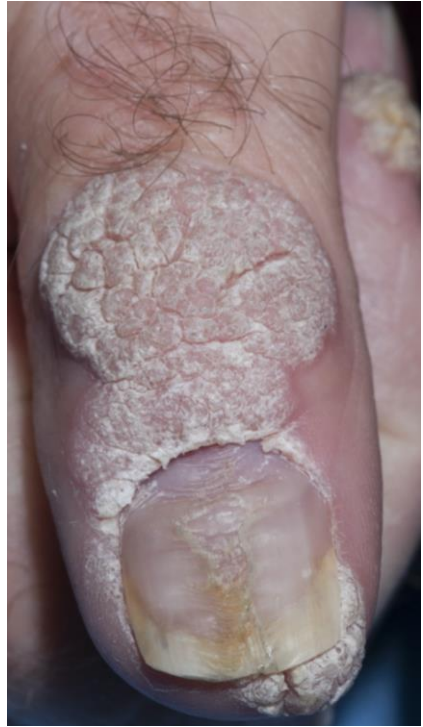

2012

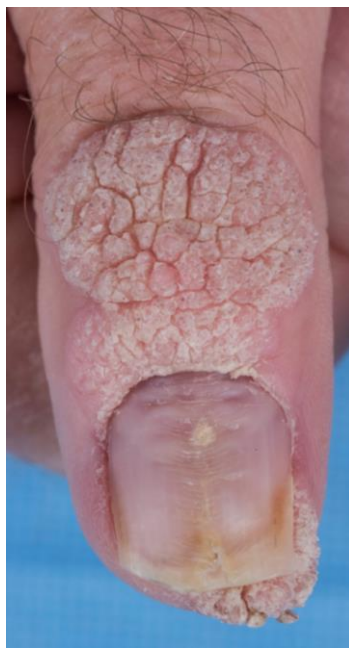

P d0  
11/12/14

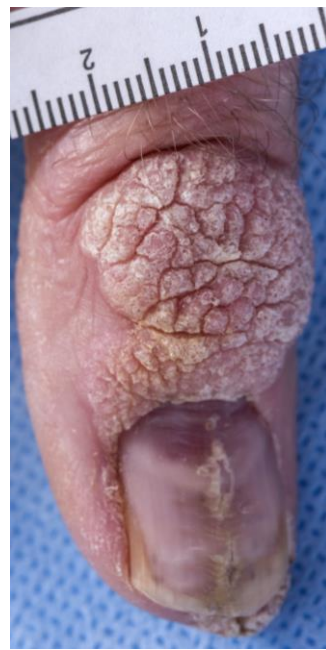

P M0

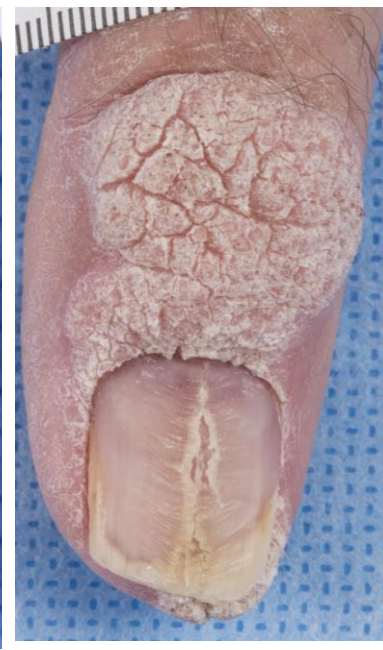

P M4

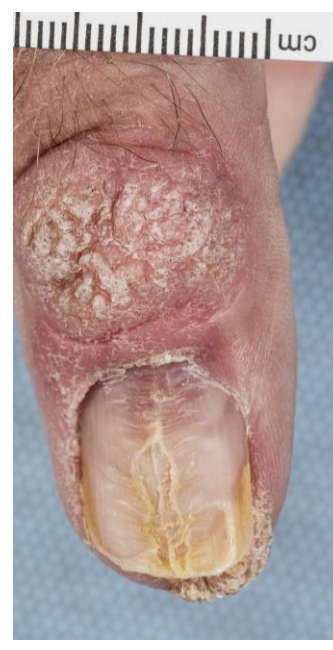

P M8

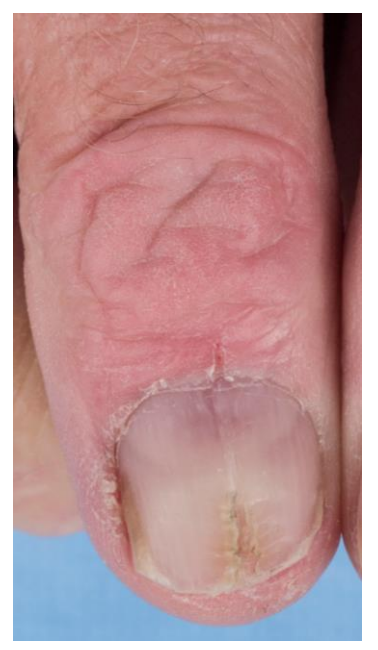

P M12

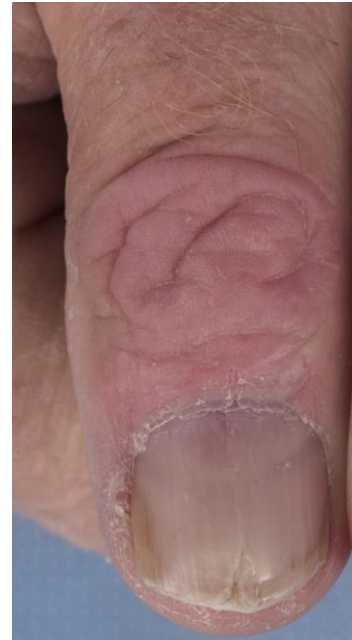

G M0

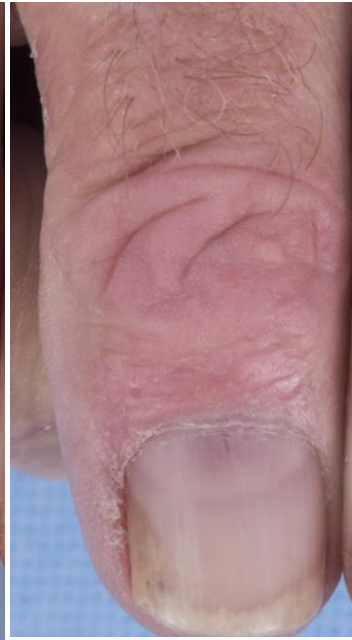

G M4

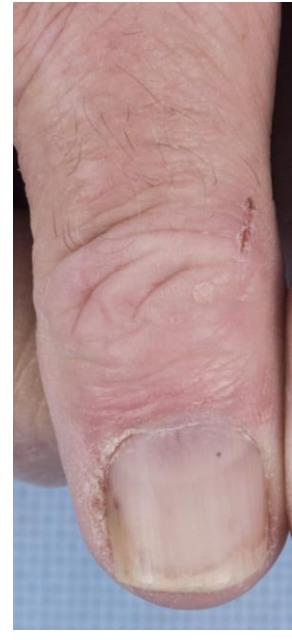

G M8

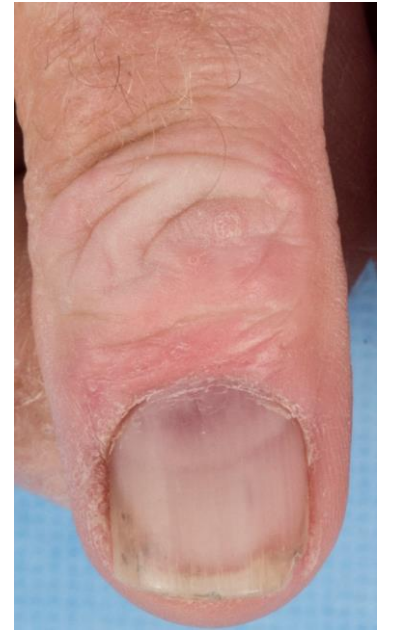

G M12

# M03

Right hand

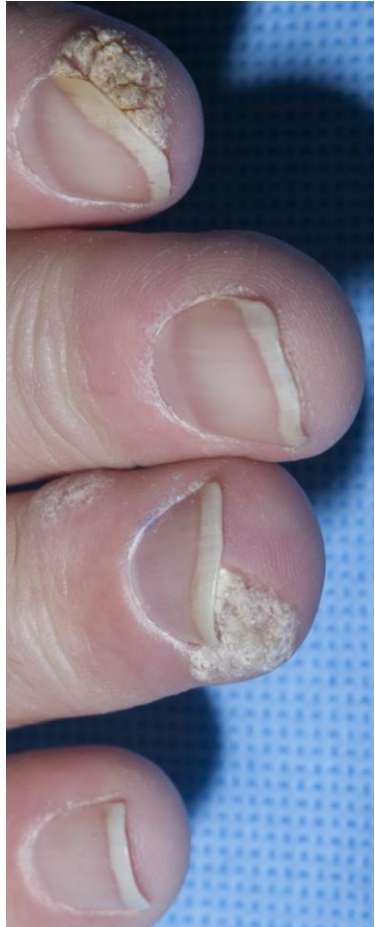

2012

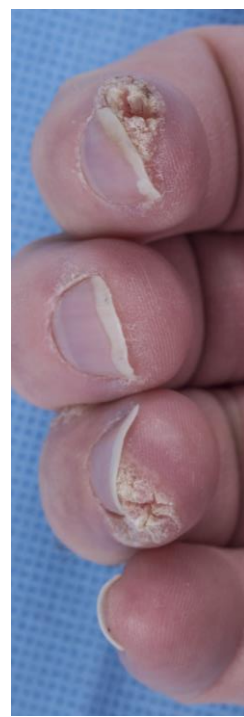

P d0  
11/12/14

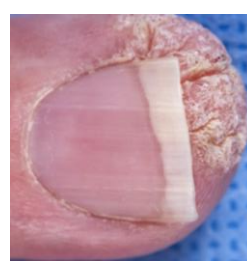

P M0

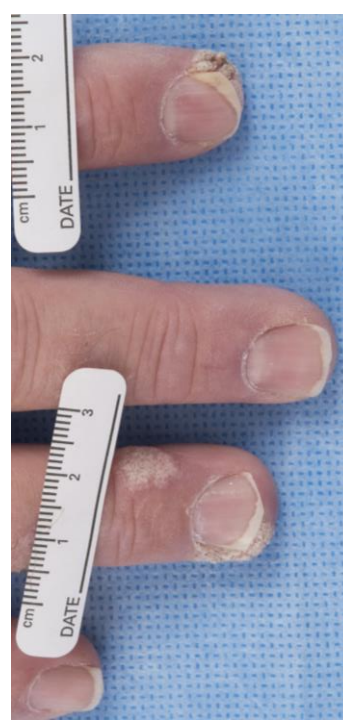

P M4

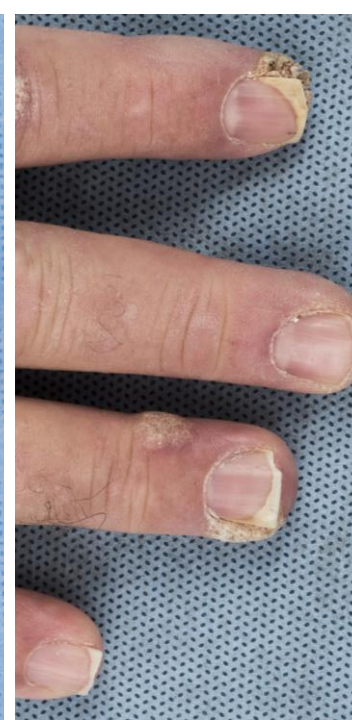

P M8

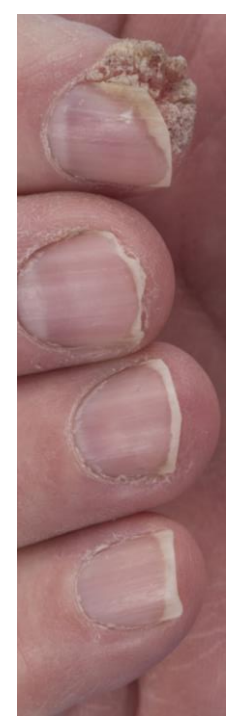

P M12

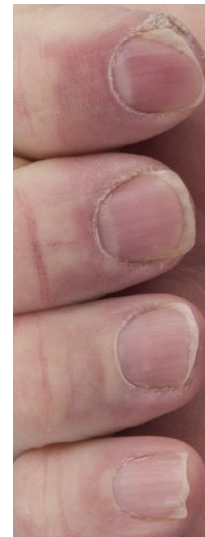

G M0

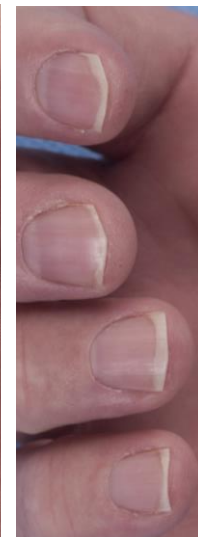

G M4

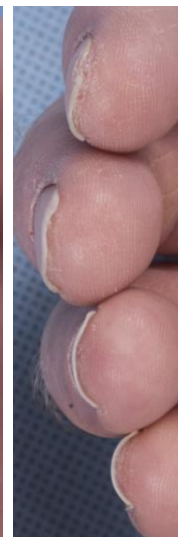

G M8

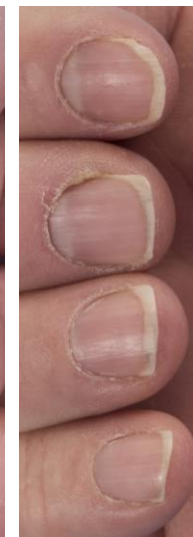

G M12

# M03

Left hand

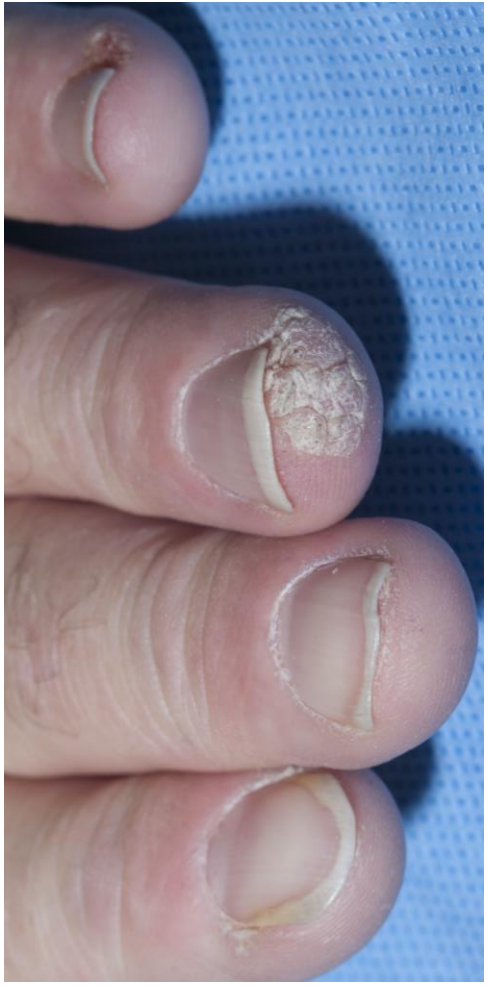

2012

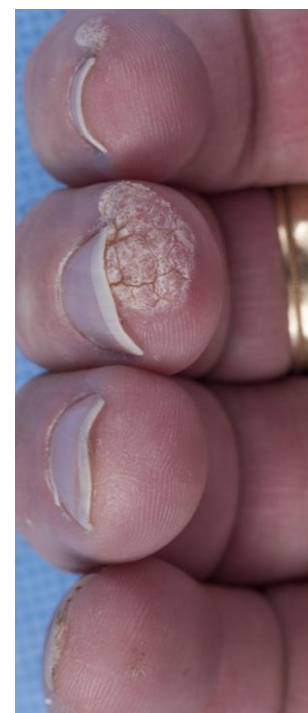

P d0  
11/12/14

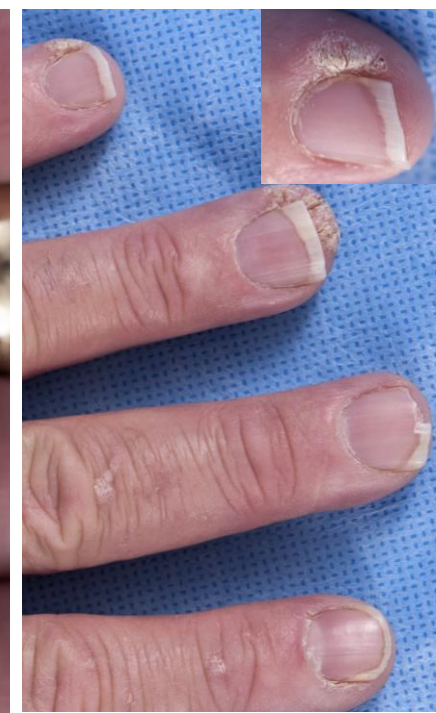

P M0

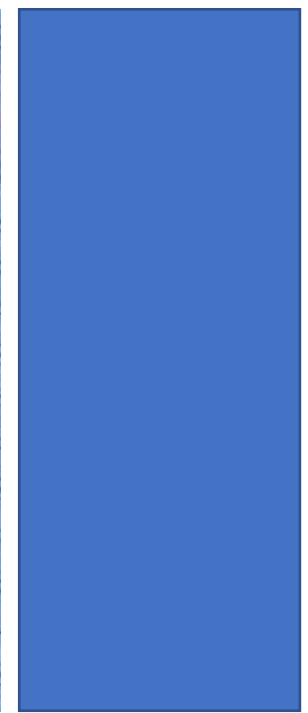

P M4

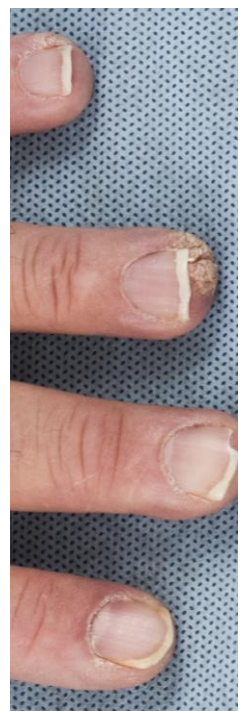

P M8

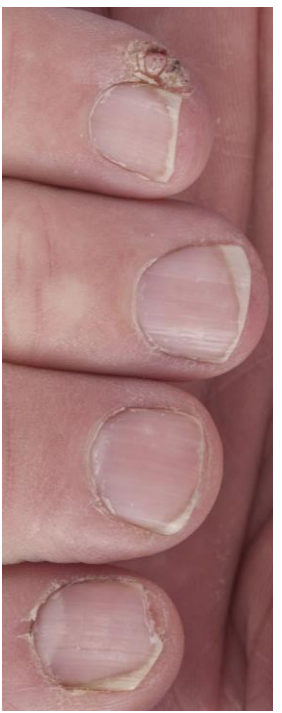

P M12

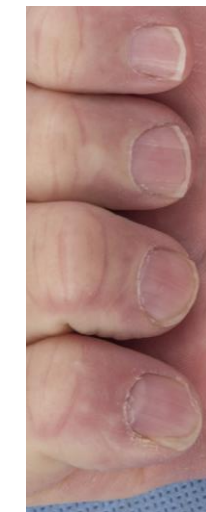

G M0

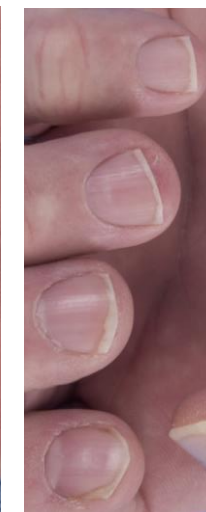

G M4

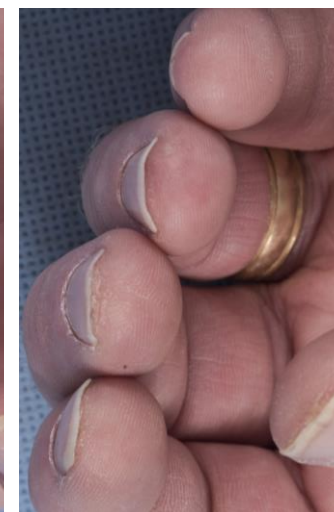

G M8

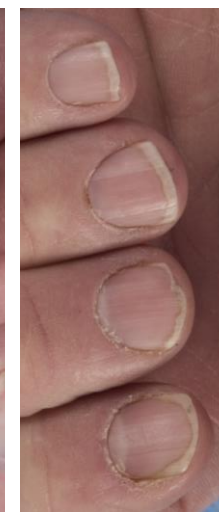

G M12

# M03 Penis, scrotum and left upper thigh

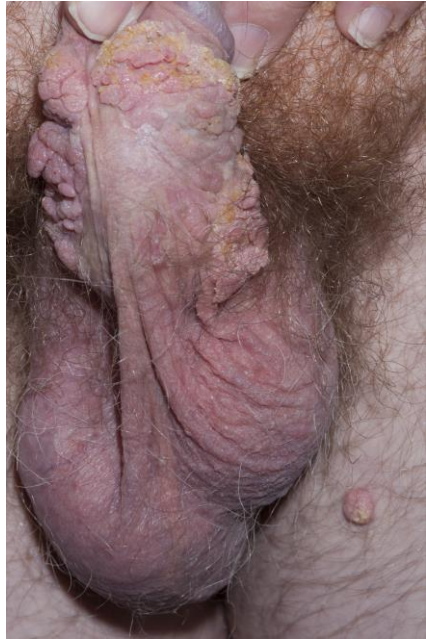

2012

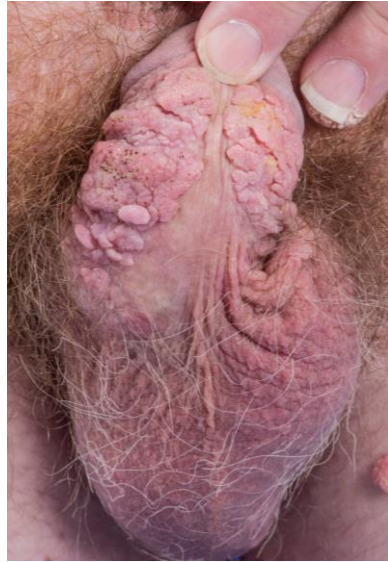

P d0  
11/12/14

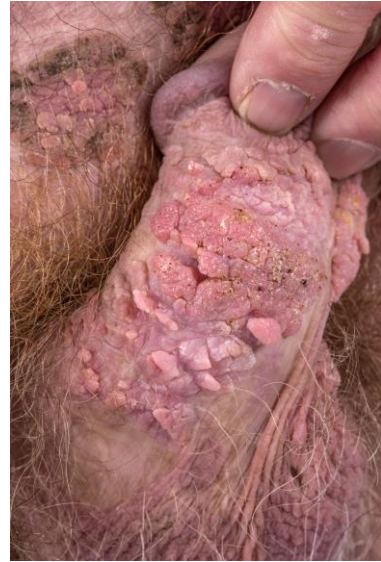

P M0

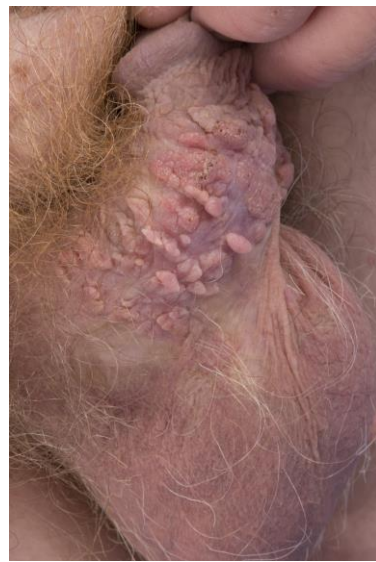

P M4

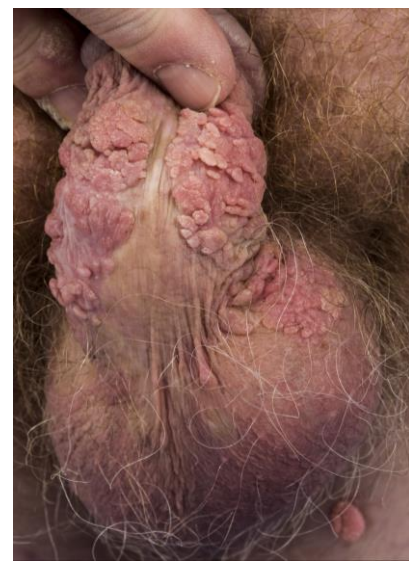

P M8

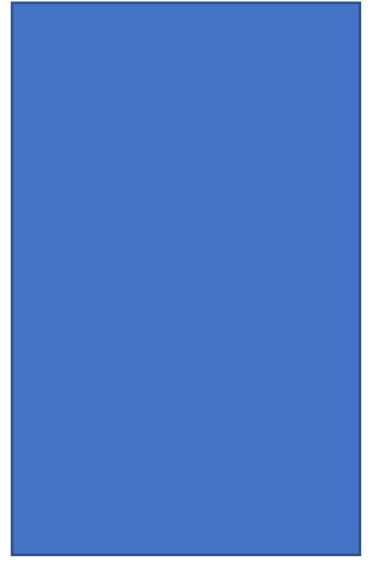

P M12

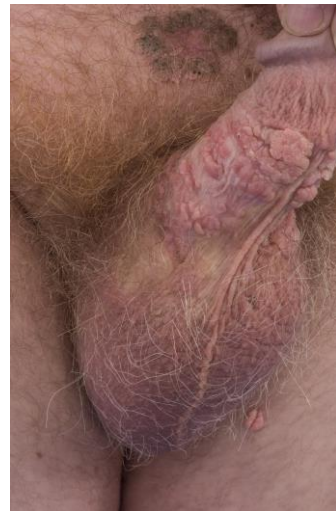

G M0

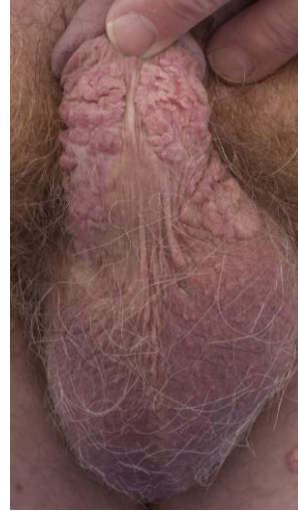

G M4

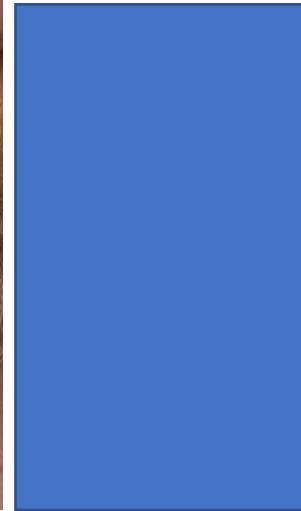

G M8

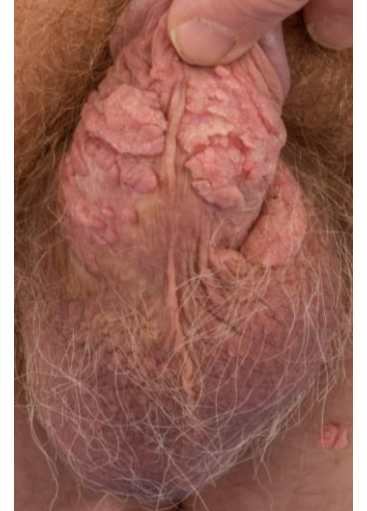

G M12

# M03 Suprapubic area

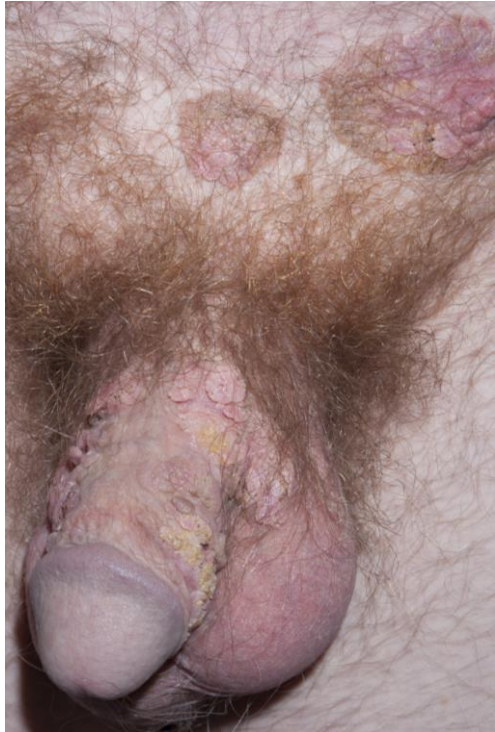

2012

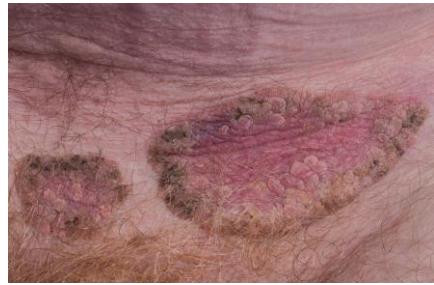

P d0  
11/12/14

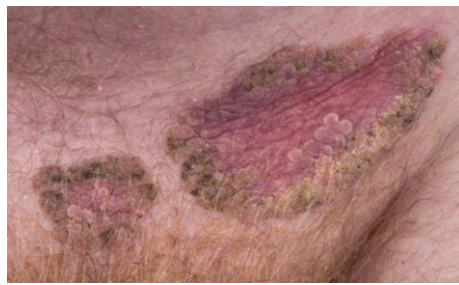

P M0

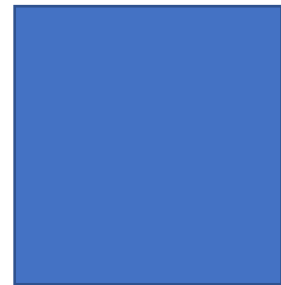

P M4

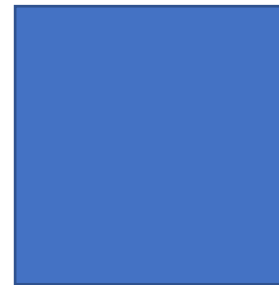

P M8

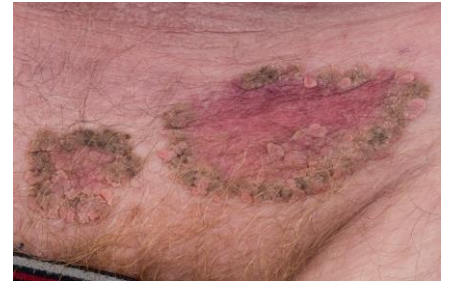

P M12

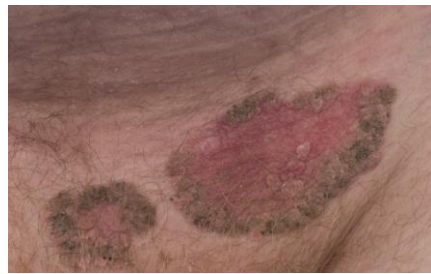

G M0

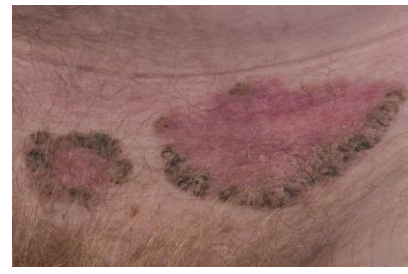

G M4

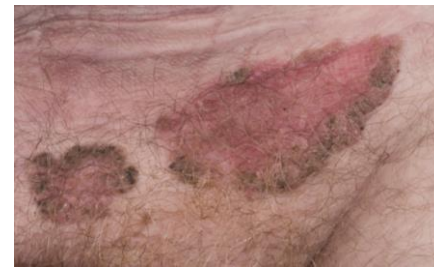

G M8

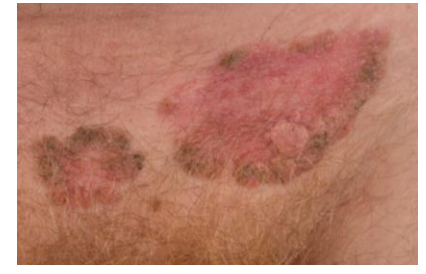

G M12



# M03 Chest area

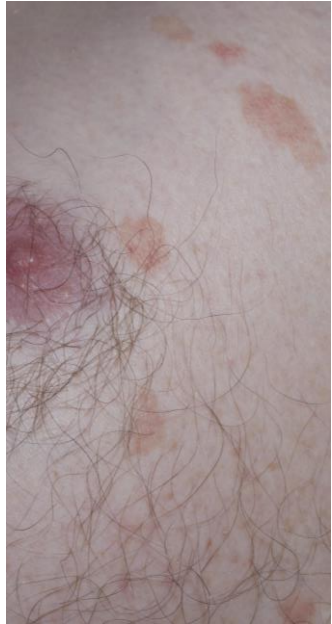

2012

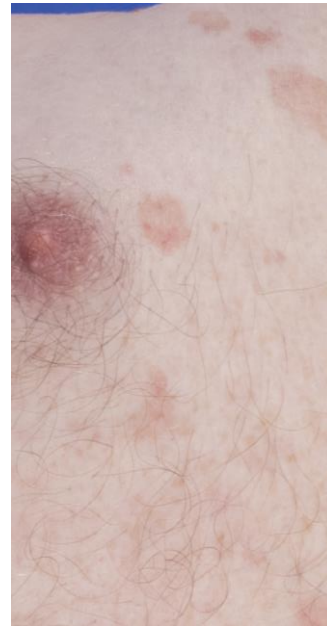

P d0  
11/12/14

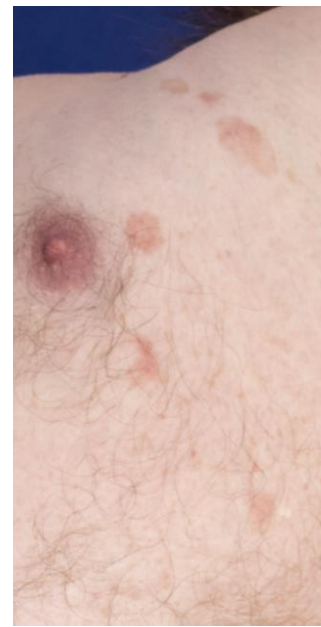

P M0

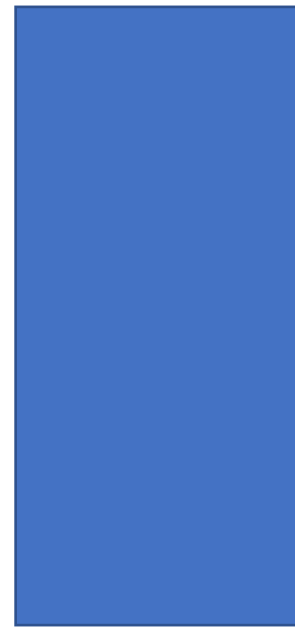

P M4

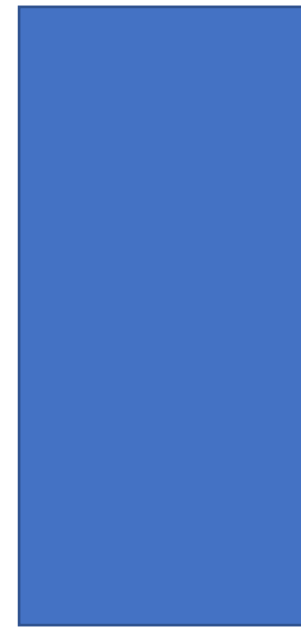

P M8

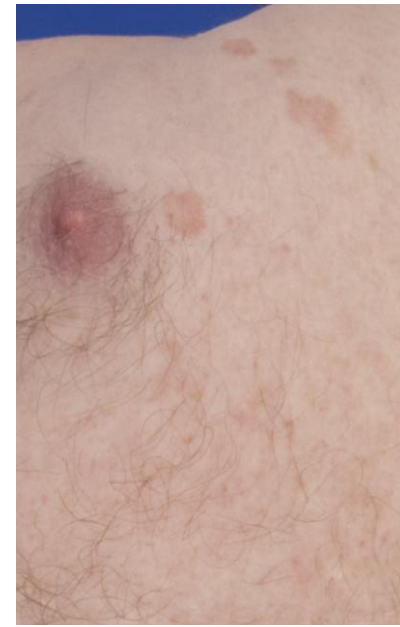

P M12

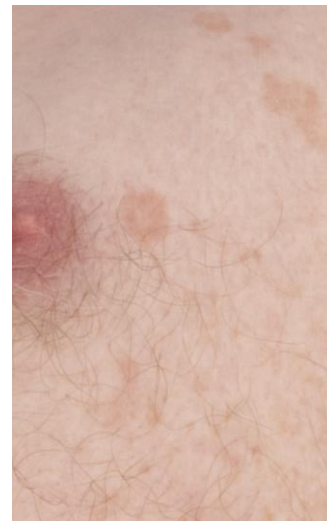

G M0

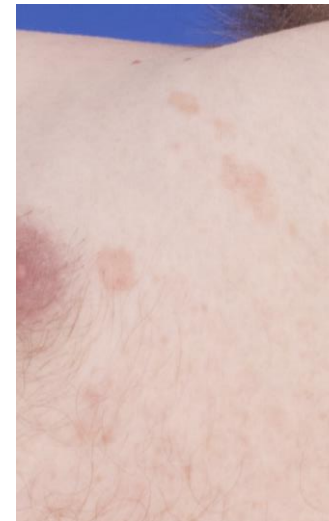

G M4

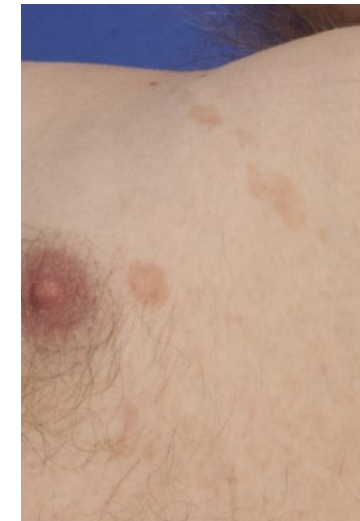

G M12

# M03 Left hand, finger 2

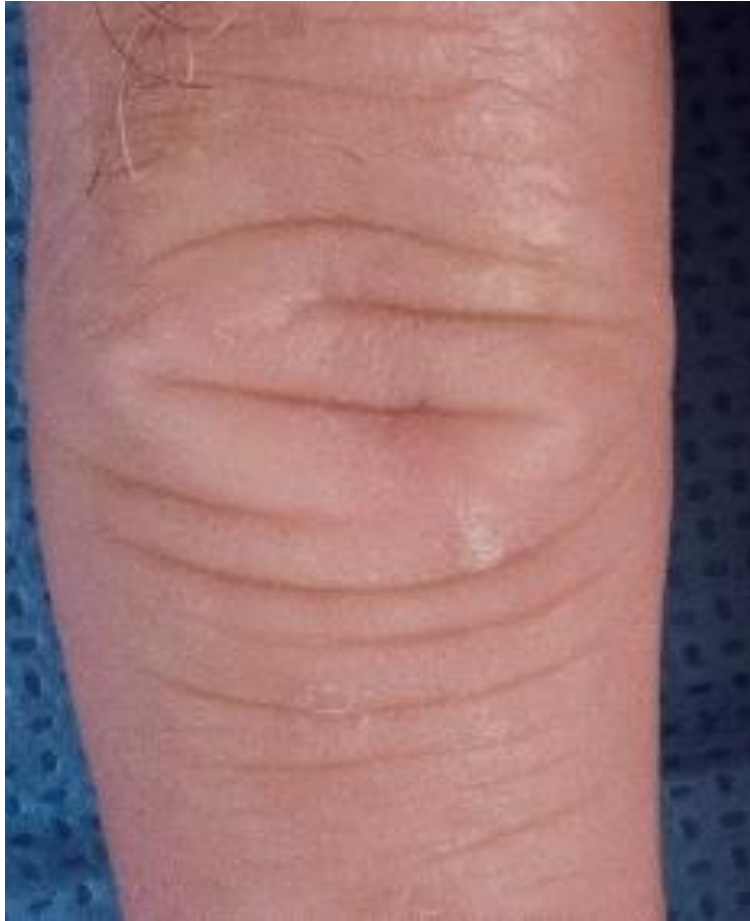

P d0

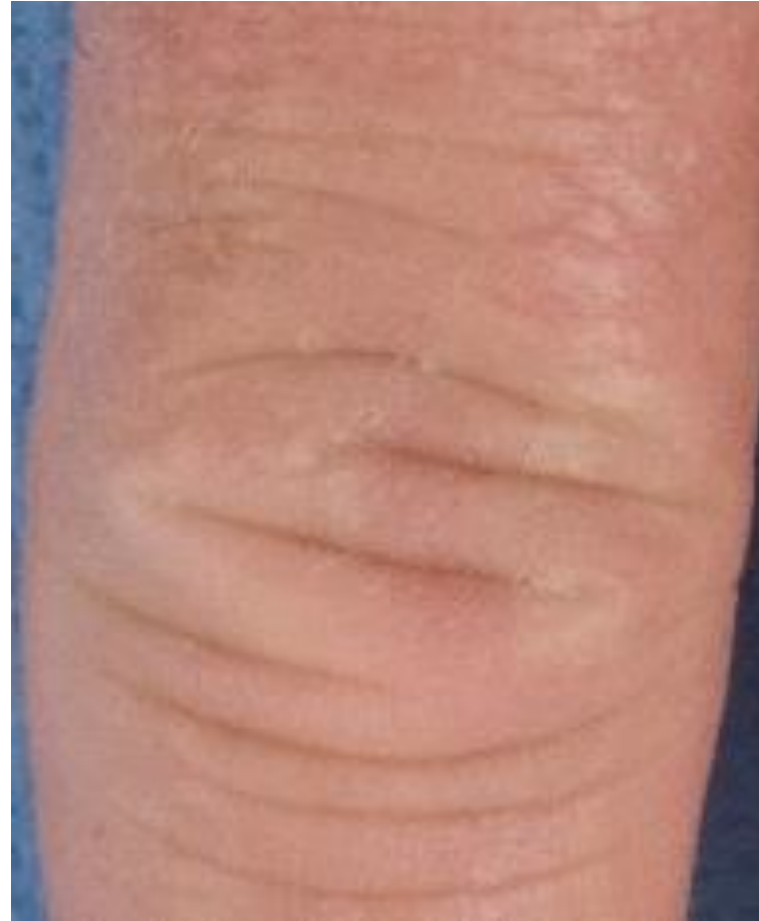

P M12

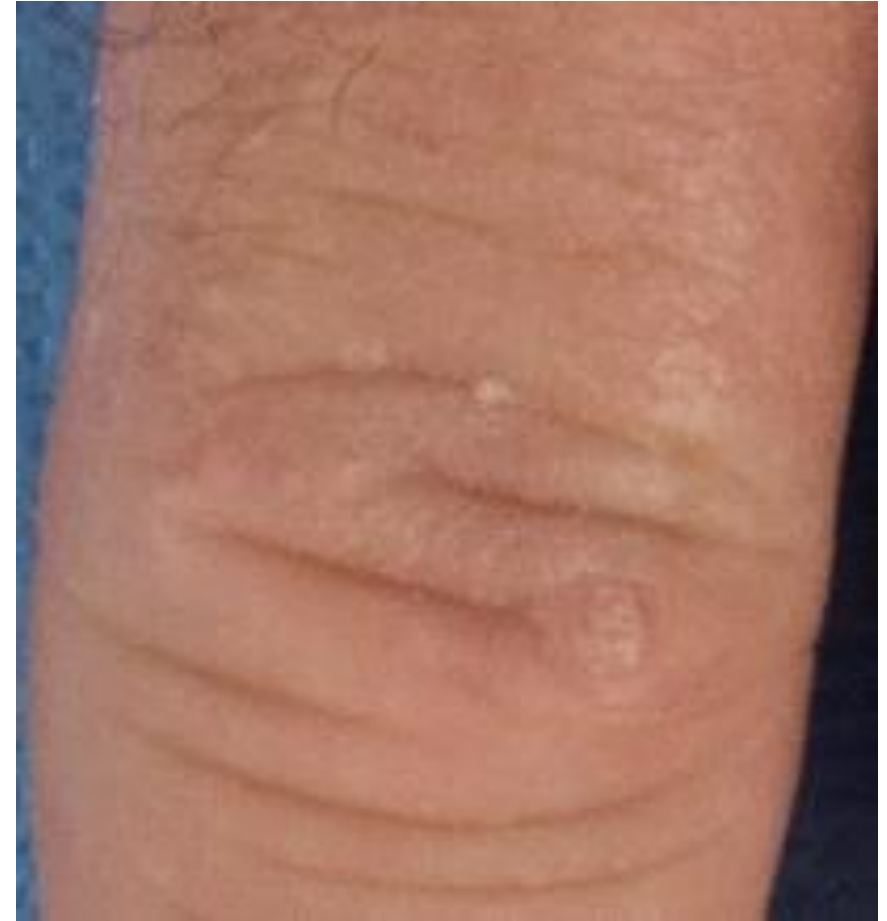

G M12

# M04 Right hand dorsum

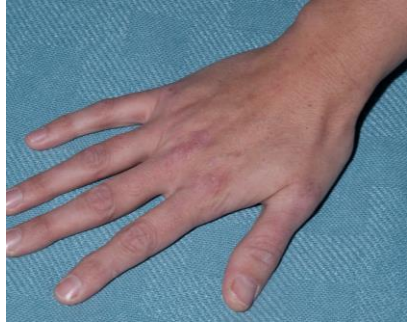

2010

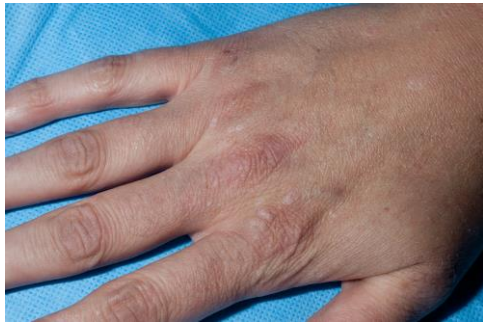

2011

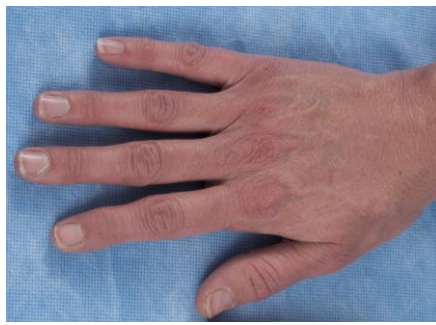

2014

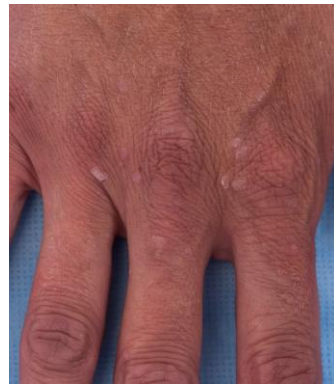

G d0

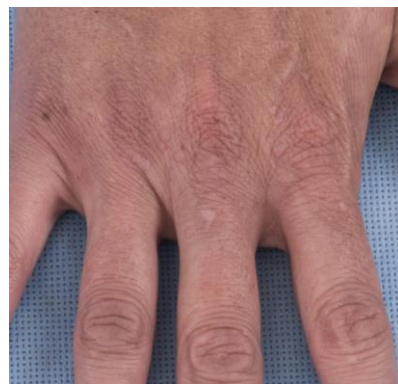

G M0

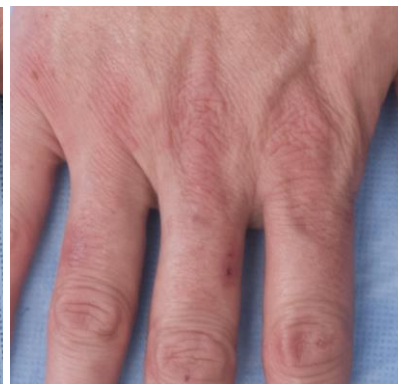

G M4

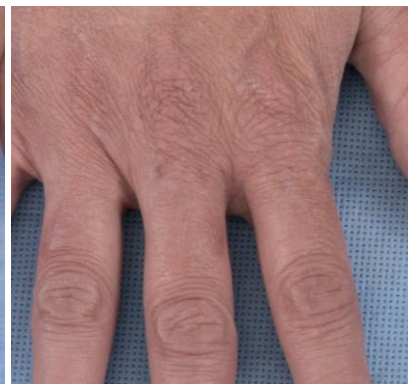

G M8

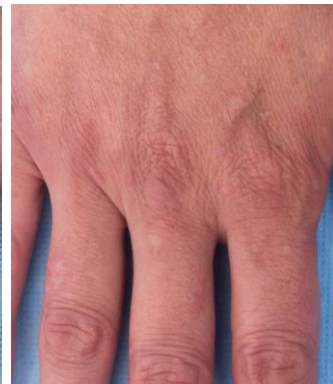

G M12

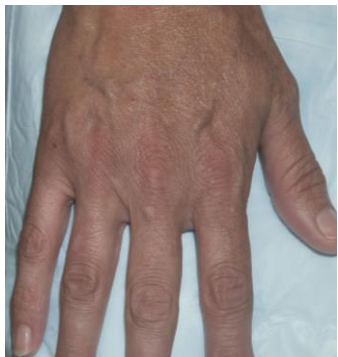

4/19

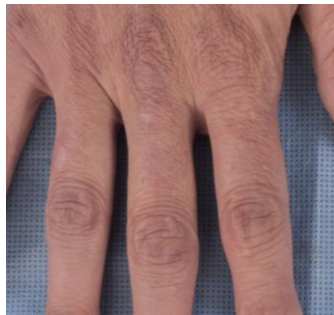

P M0

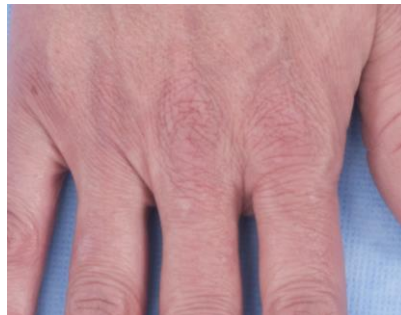

P M4

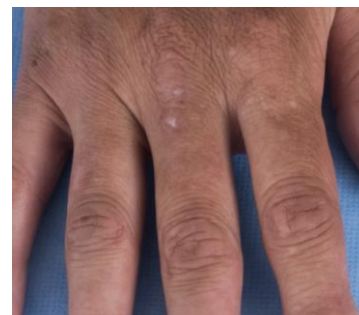

P M8

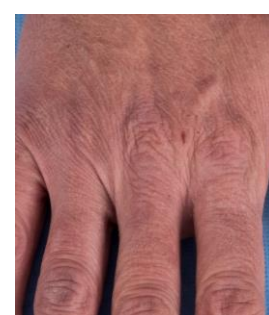

P M12

# M04 Left hand, finger 3 dorsum

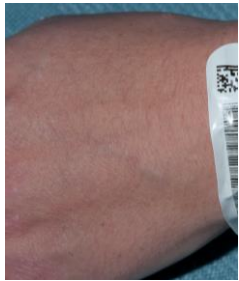

2010

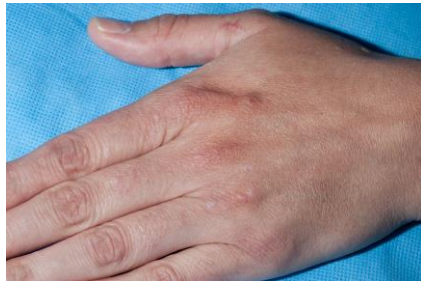

2011

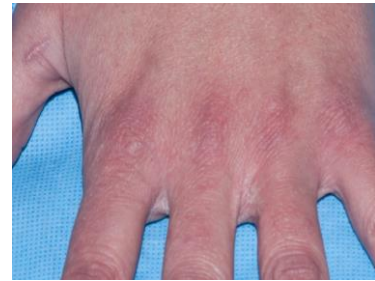

2012

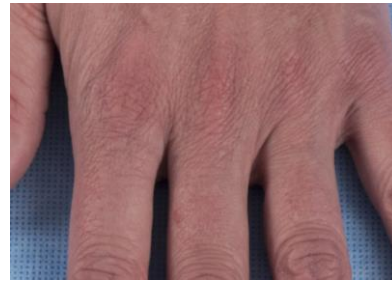

2014

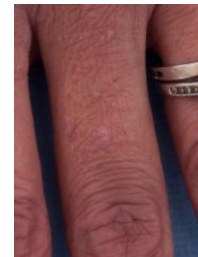

G d0

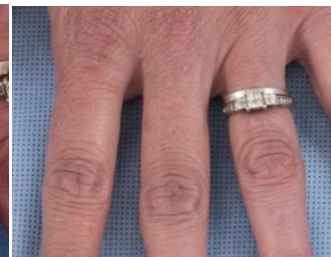

G M0

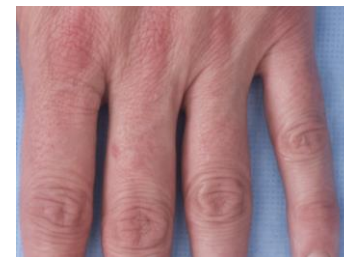

G M4

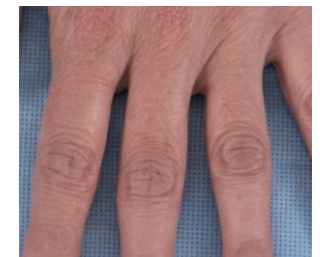

G M8

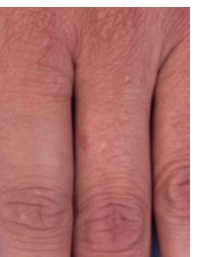

G M12

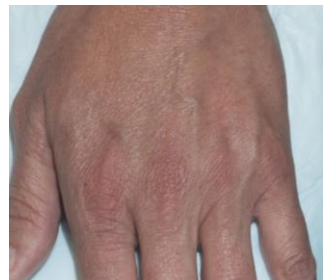

4/19

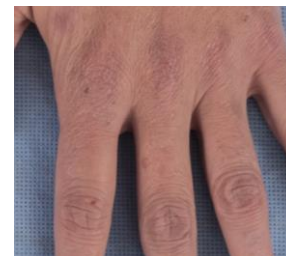

P M0

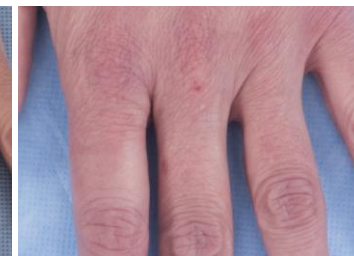

P M4

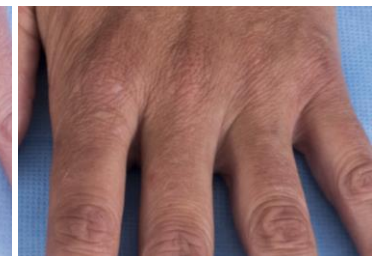

P M8

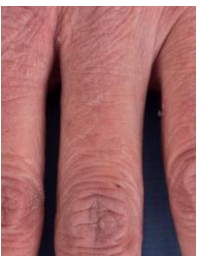

P M12

# M04 Genitalia

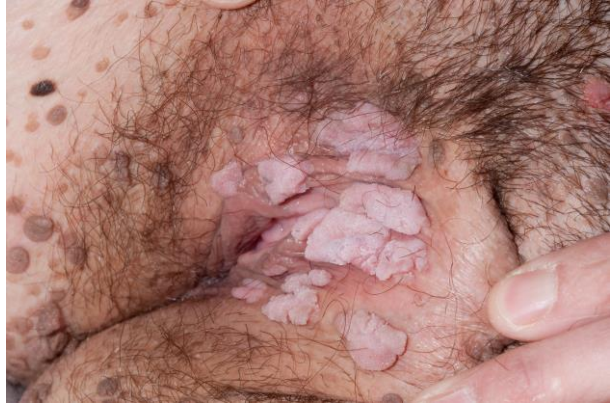

2010

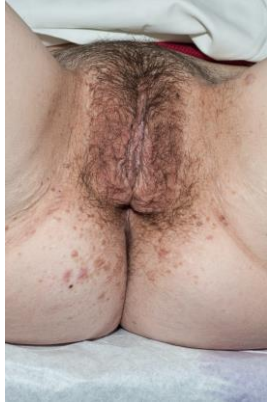

2011

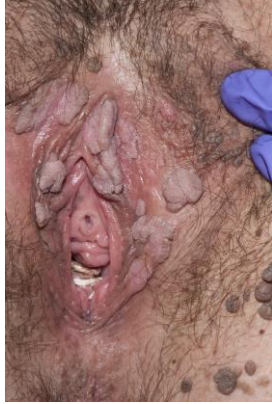

2012

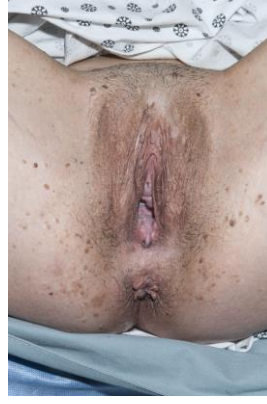

2013

Post surgery

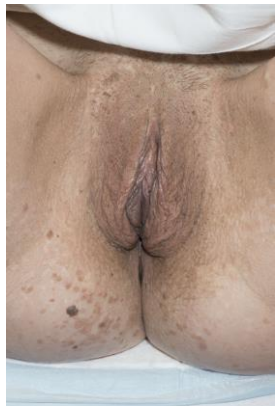

4/19

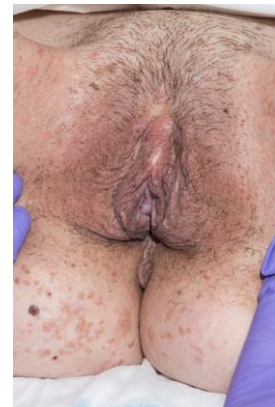

G d0

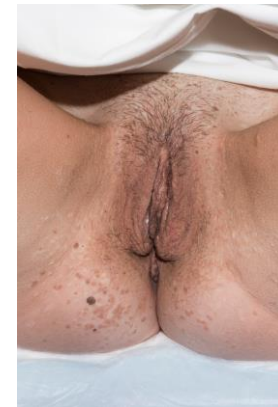

G M12

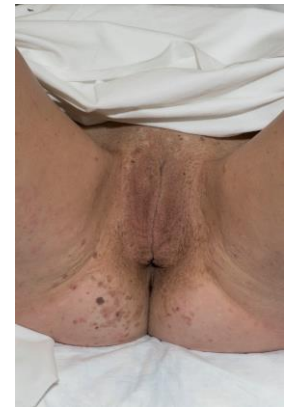

P M12

# M05

Right hand

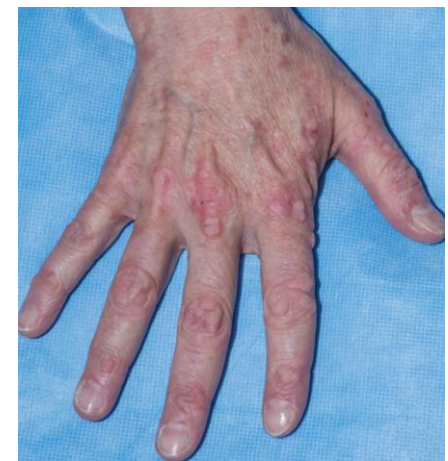

6/2013

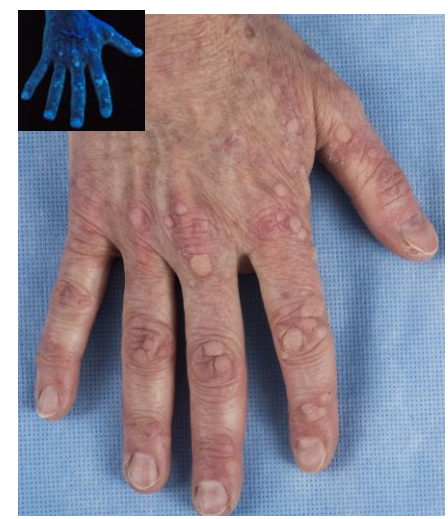

1/2015

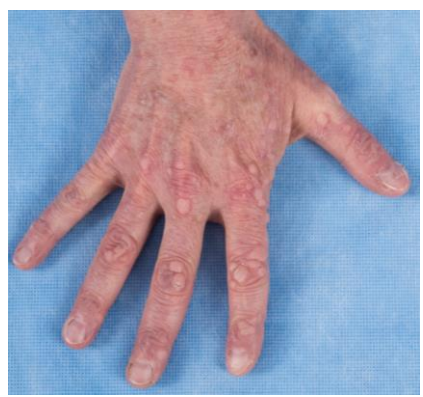

P d0 3/2015

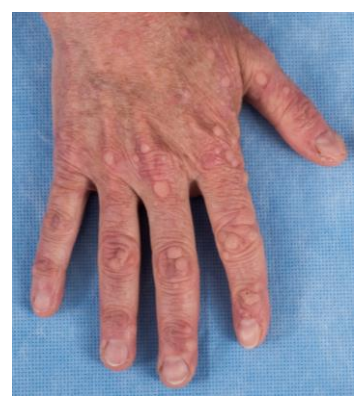

P M0

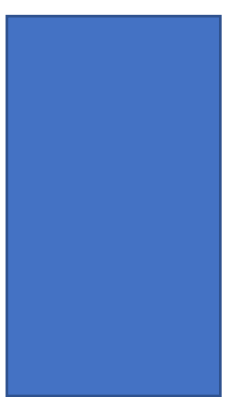

P M4

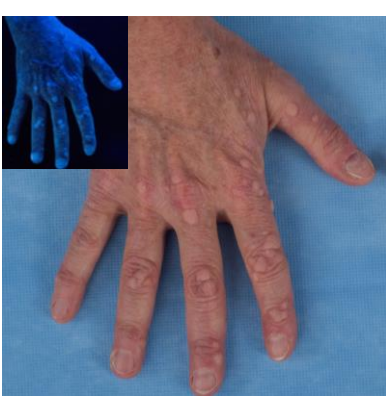

P M8

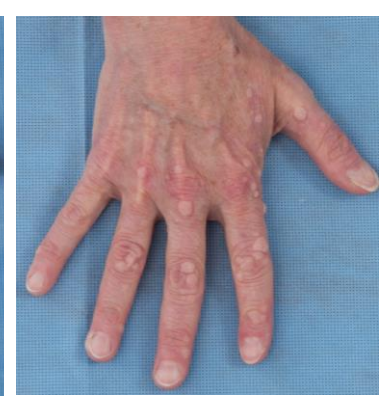

P M12

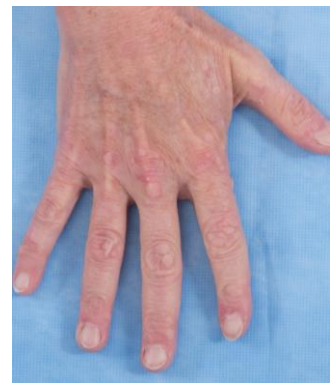

G M0

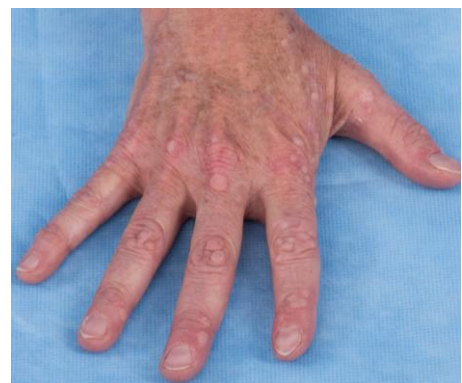

G M4

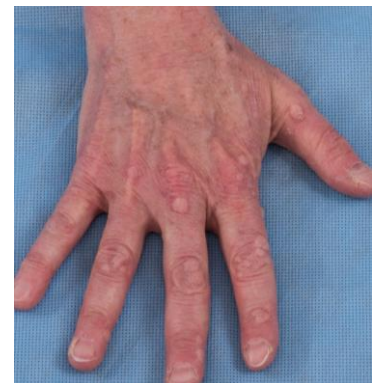

G M8

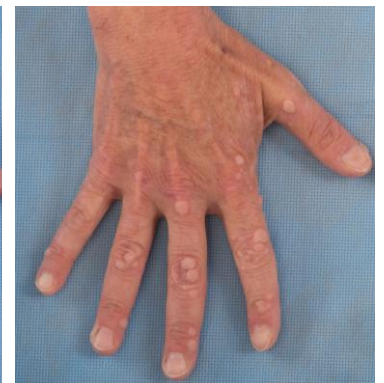

G M12

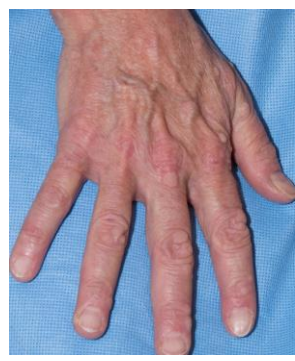

11/2017

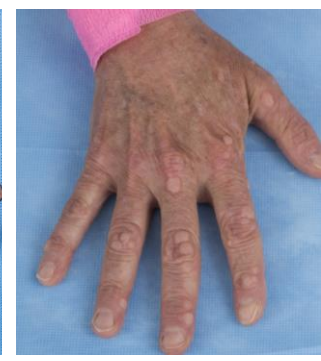

7/2018

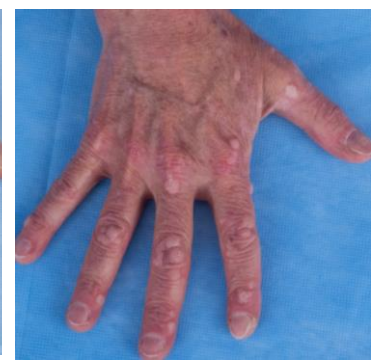

6/2019

# M05

Left hand

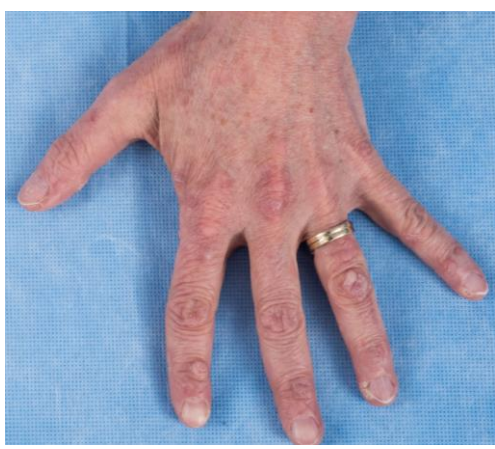

P d0

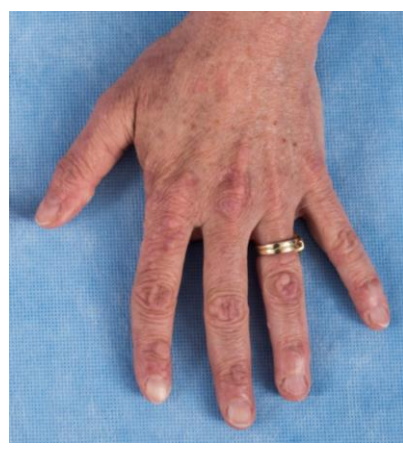

P M0

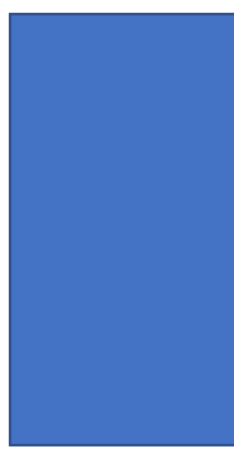

P M4

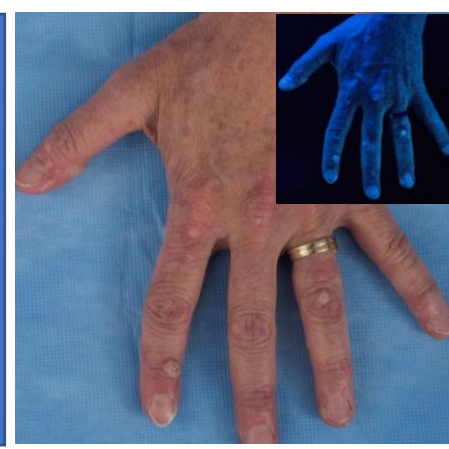

P M8

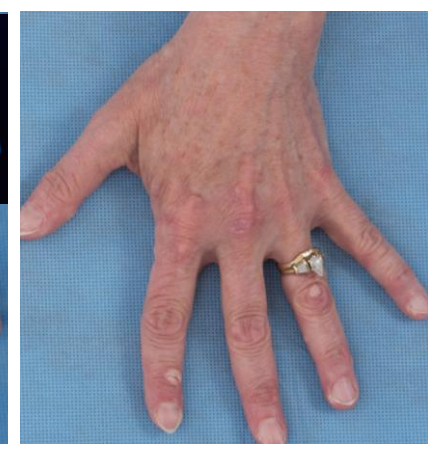

P M12

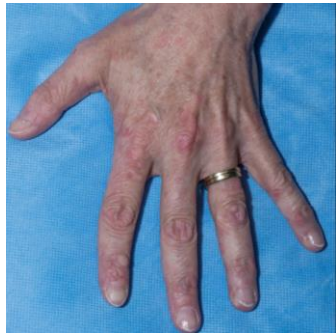

6/2013

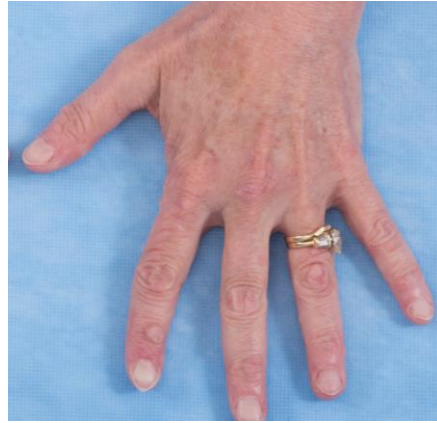

G M0

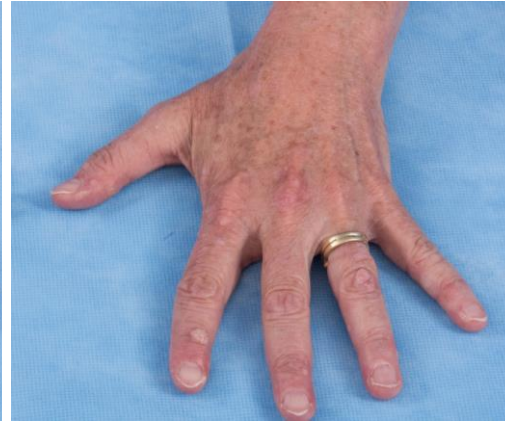

G M4

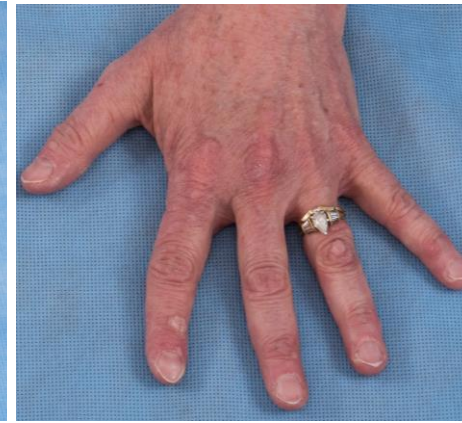

G M8

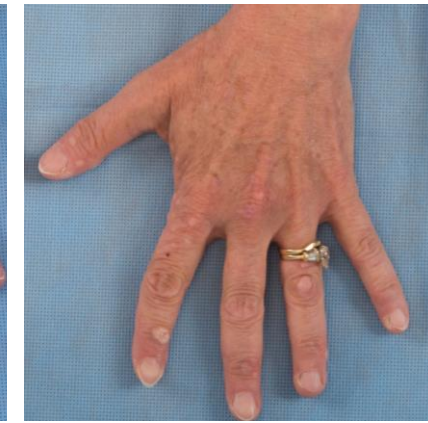

G M12

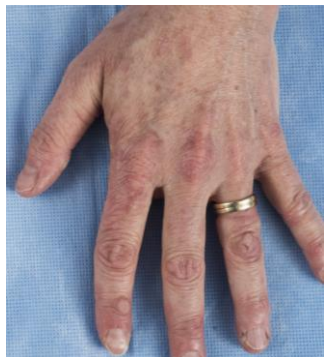

1/2015

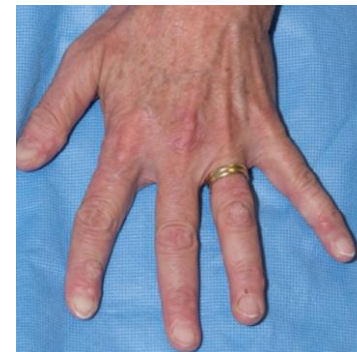

11/2017

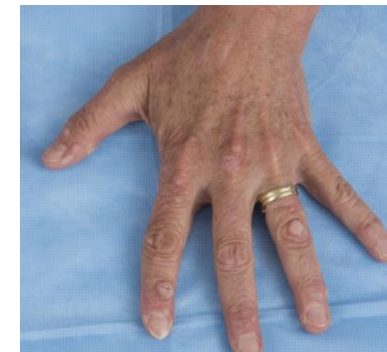

7/2018

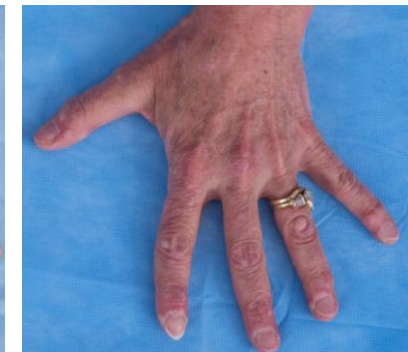

6/2019

# M05

Left pinky

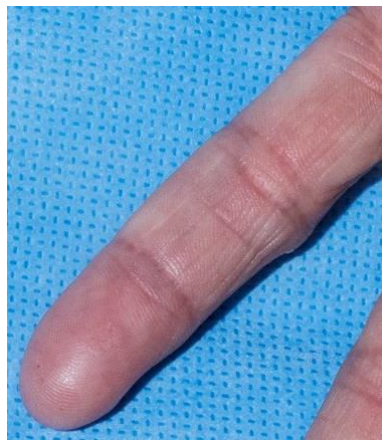

6/2013

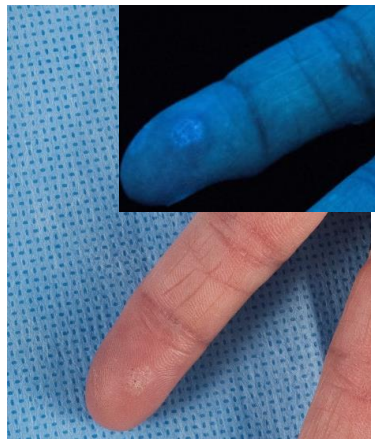

1/2015

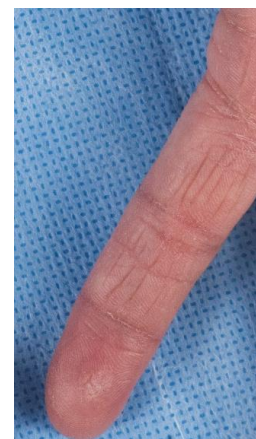

P d0

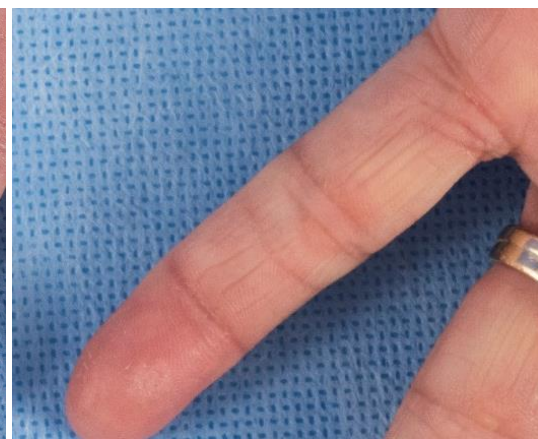

P M0

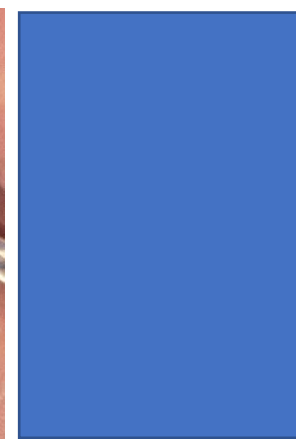

P M4

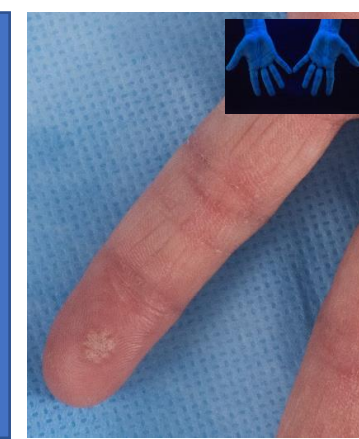

P M8

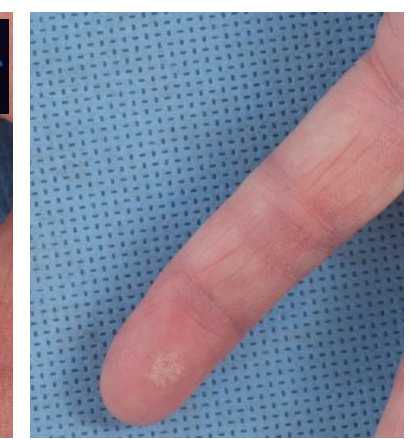

P M12

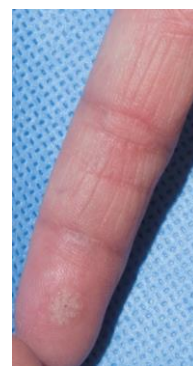

11/2017

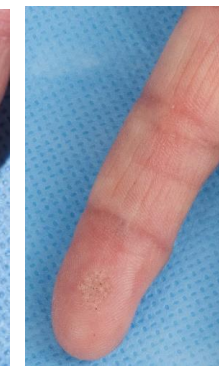

7/2018

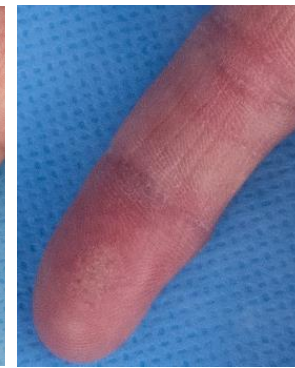

6/2019

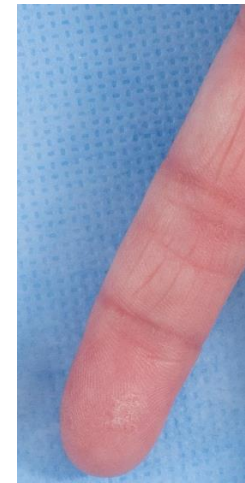

G M0

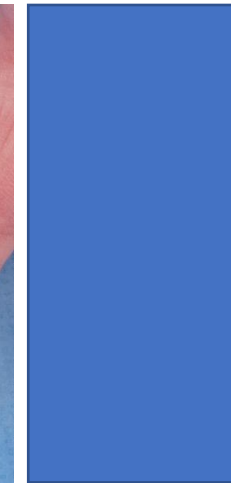

G M4

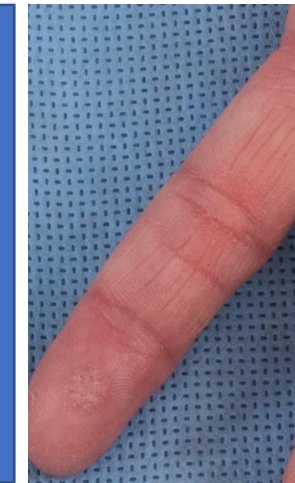

G M8

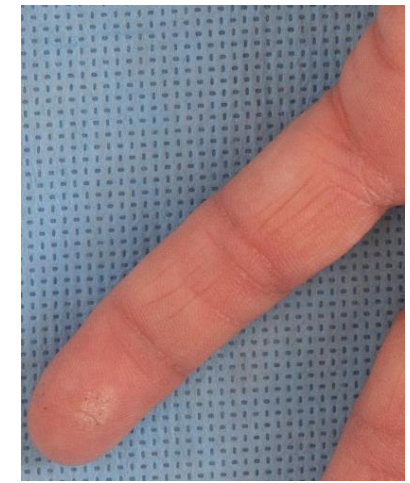

G M12



# M05 Left foot plantar surface

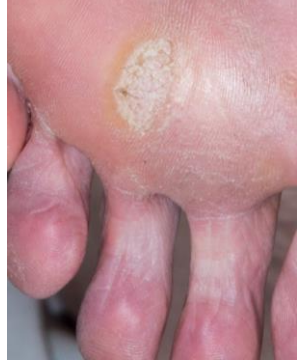

6/2013

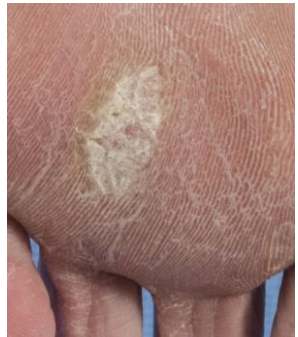

1/2015

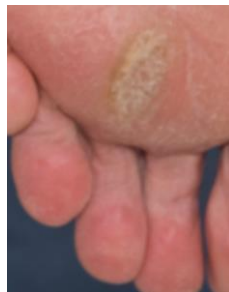

11/2017

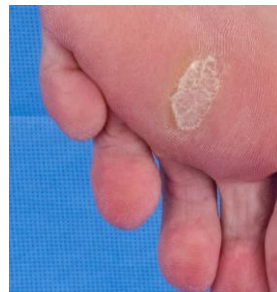

7/2018

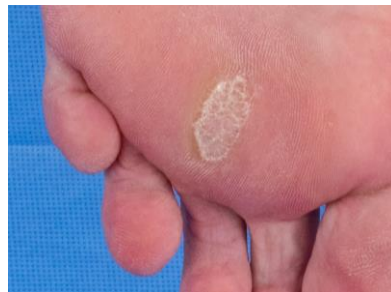

6/2019

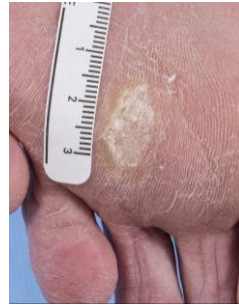

P d0

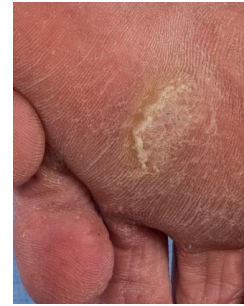

P M0

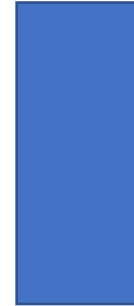

P M4

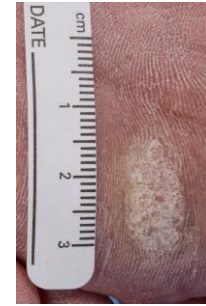

P M8

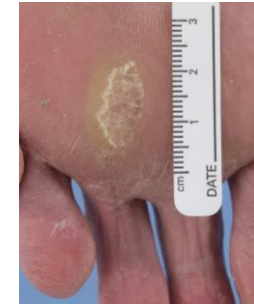

P M12

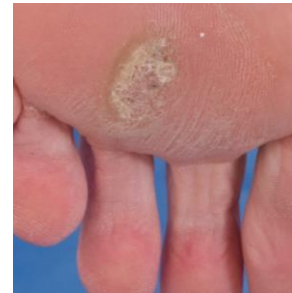

G M0

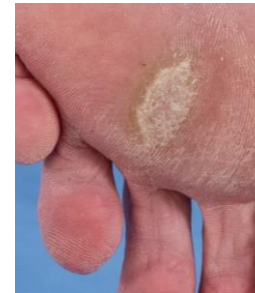

G M4

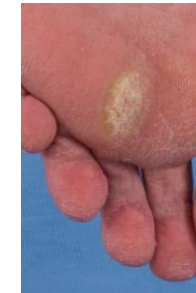

G M8

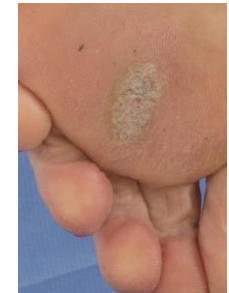

G M12

# M06 Right thumb

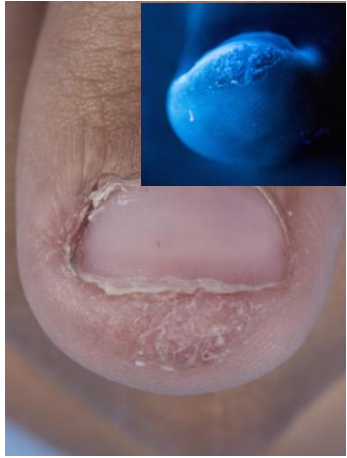

P d0

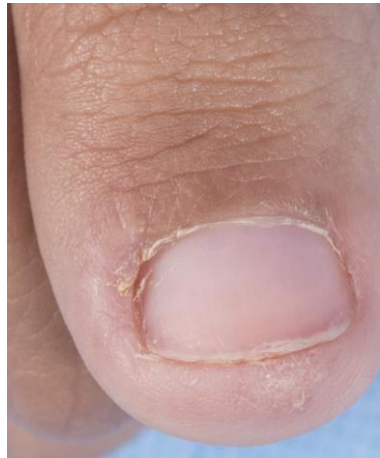

P M0

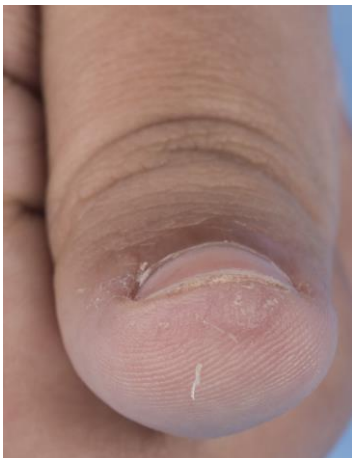

P M4

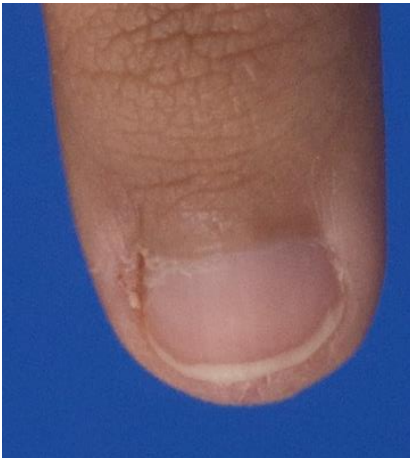

P M8

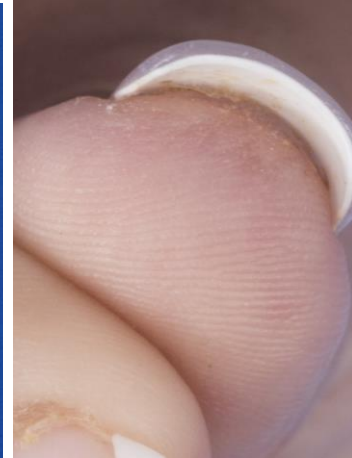

P M12

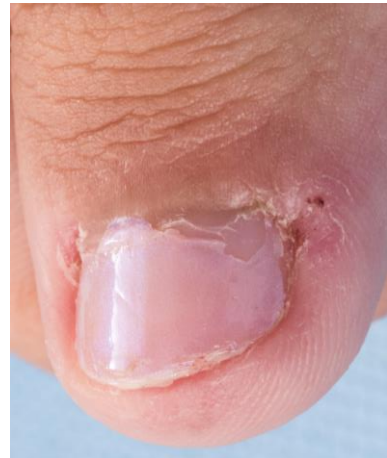

G M0

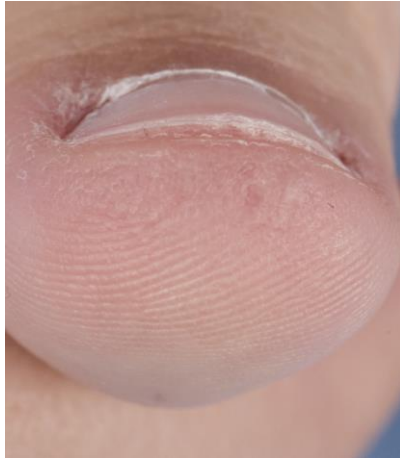

G M4

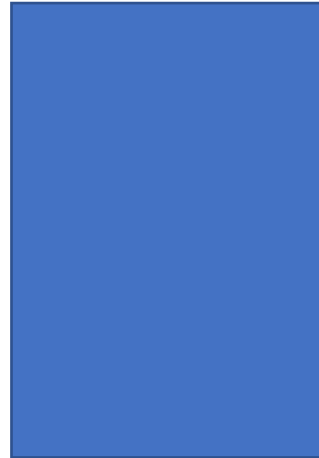

G M8

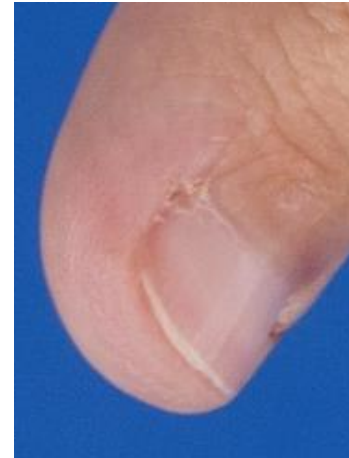

G M12

# M06

Left foot dorsum

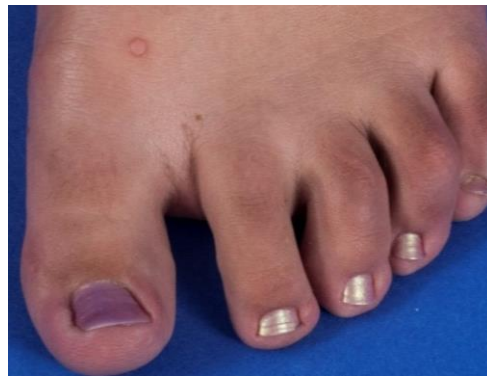

P d0

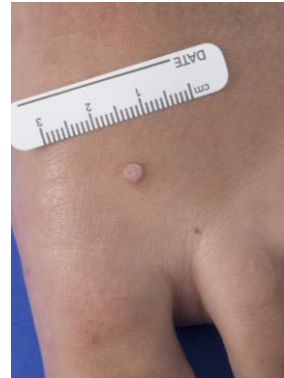

P M0

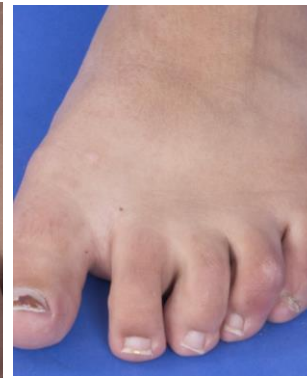

P M4

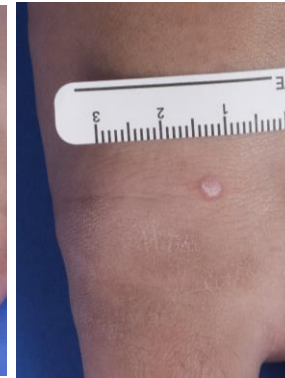

P M12

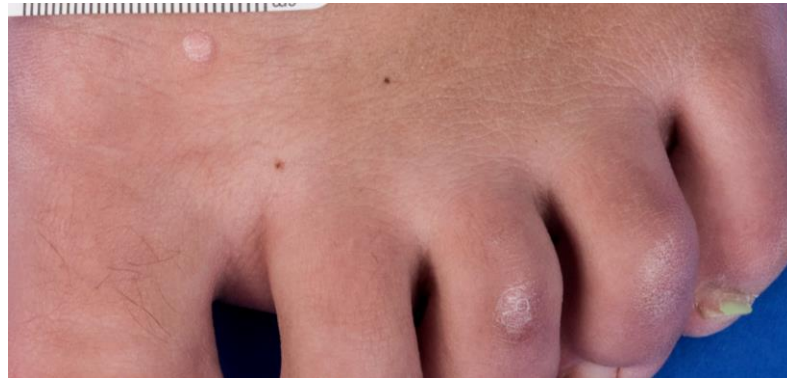

G M0

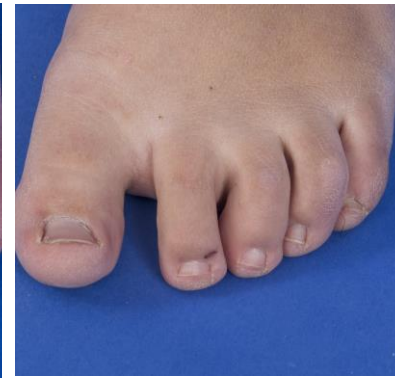

G M4

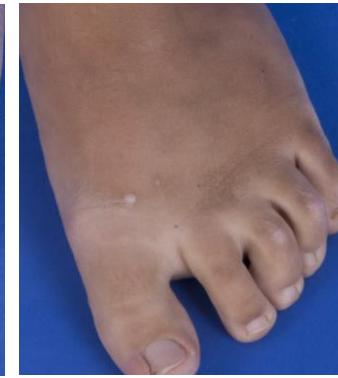

G M8

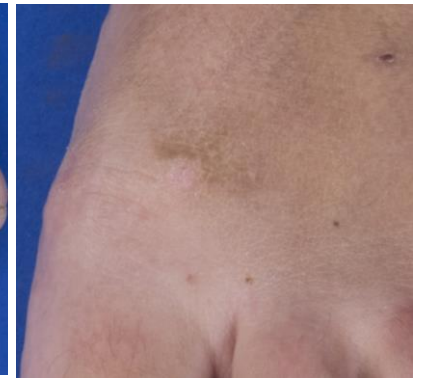

G M12

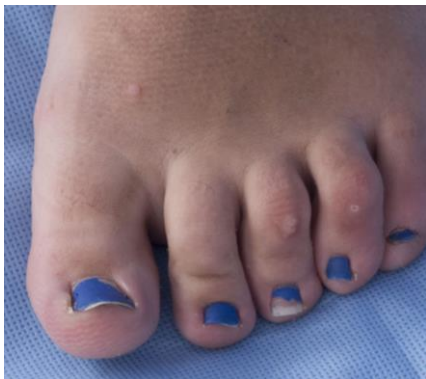

12/2019

# M06 Right elbow

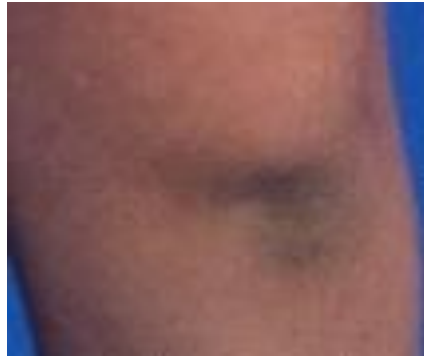

P d0

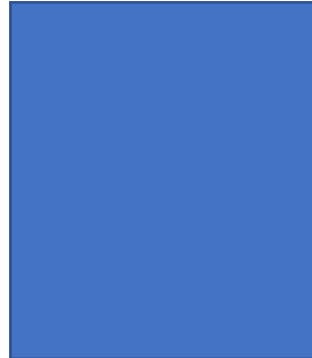

P M4

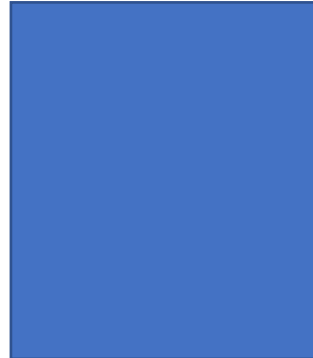

P M8

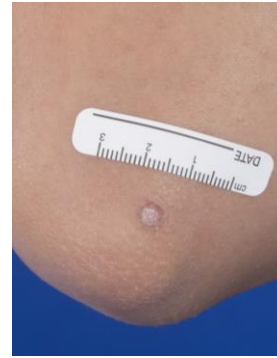

P M12

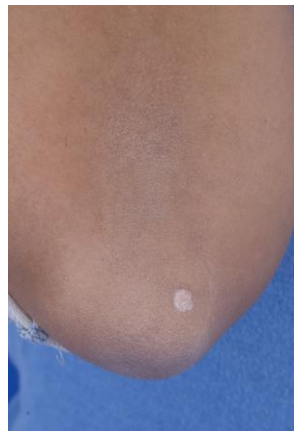

12/2019

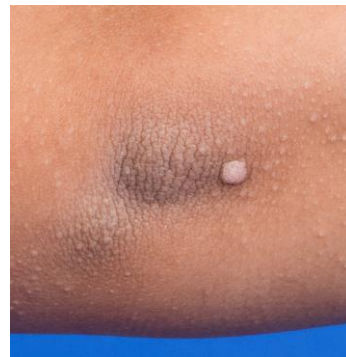

G M0

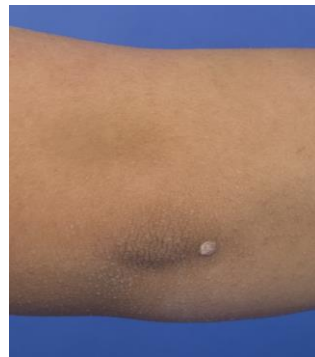

G M4

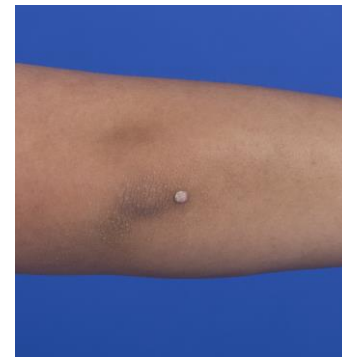

G M8

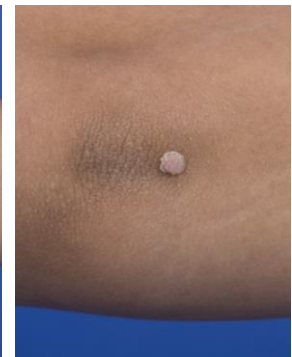

G M12

# M07 Right elbow

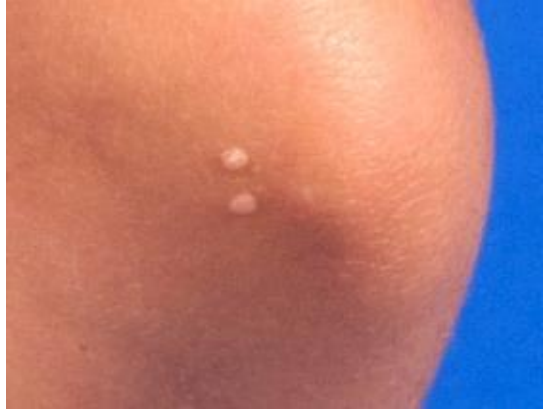

8/14

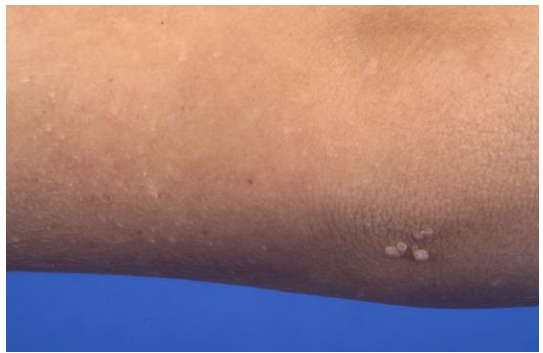

6/15

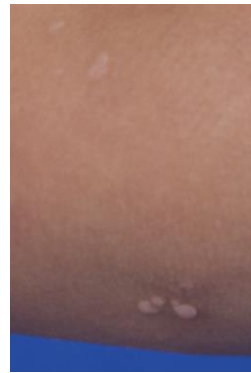

G d0  
10/2015

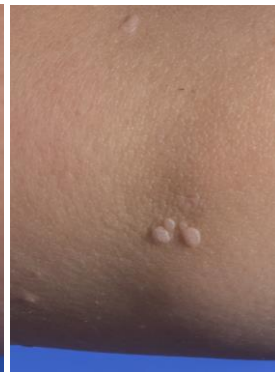

G M0

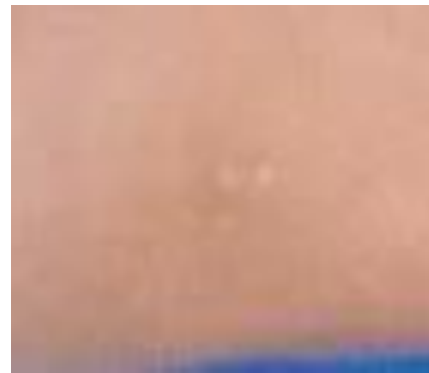

G M4

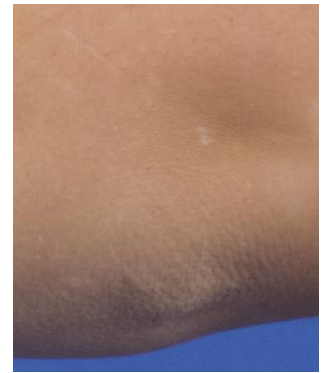

G M12

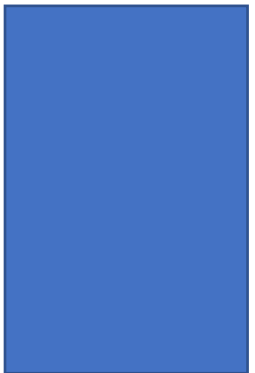

P M0  
Failed on P

# M07 Left elbow

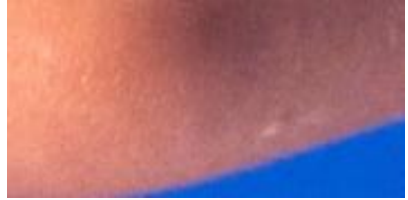

8/14

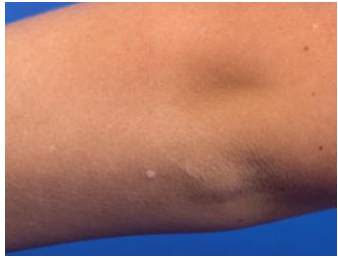

6/15

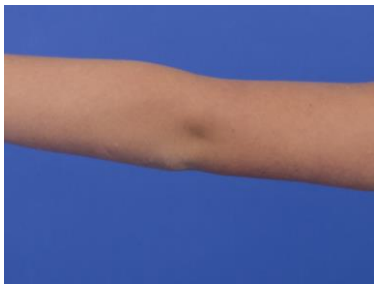

7/17

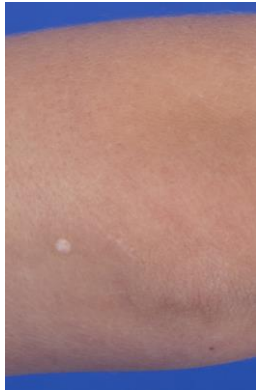

G d0

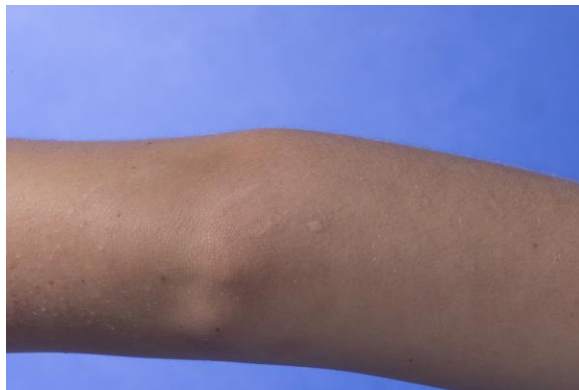

G M0

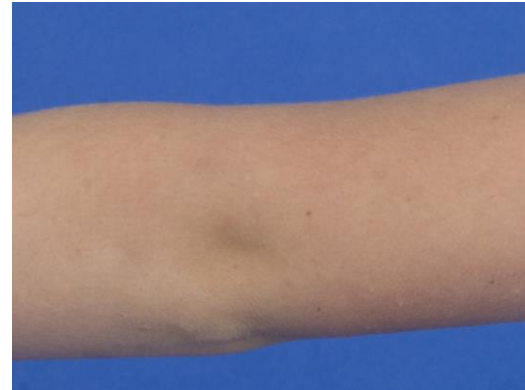

G M4

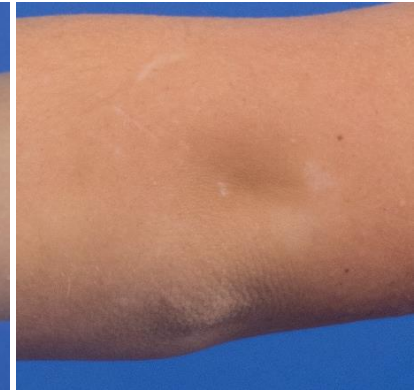

G M12

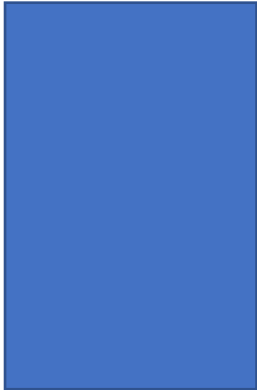

P M0 na  
Failed on P

# M07 Buttocks, perirectal area

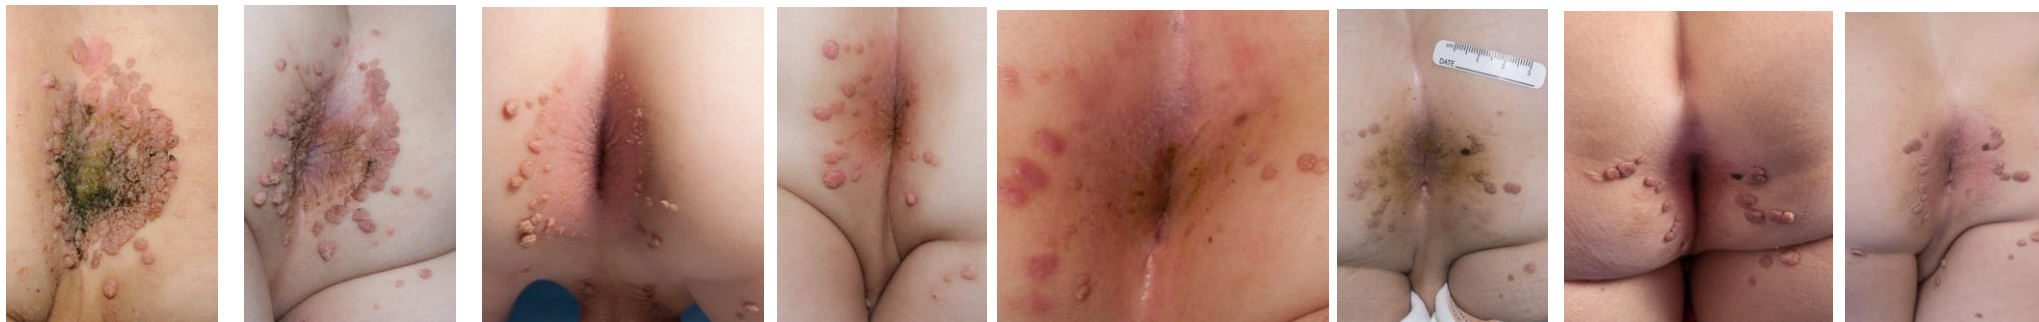

11/09

8/10

7/11

6/12

9/7/12

4/13

8/14

6/15

Tagamet  
Aldara

Podophyllin  
IVIG

Pre-surgical  
Removal

Post-surgical  
Removal

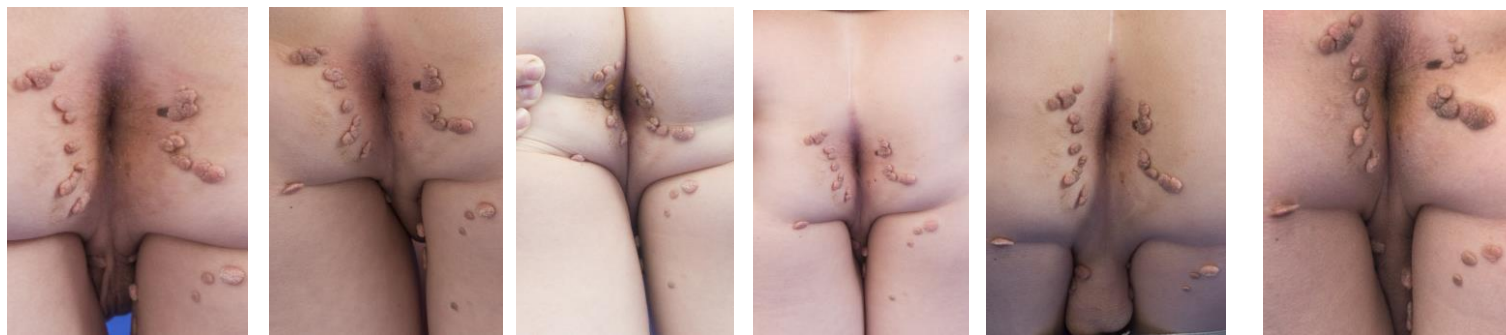

G d0

G M0

G M4

G M8

G M12

P M0  
Failed on P

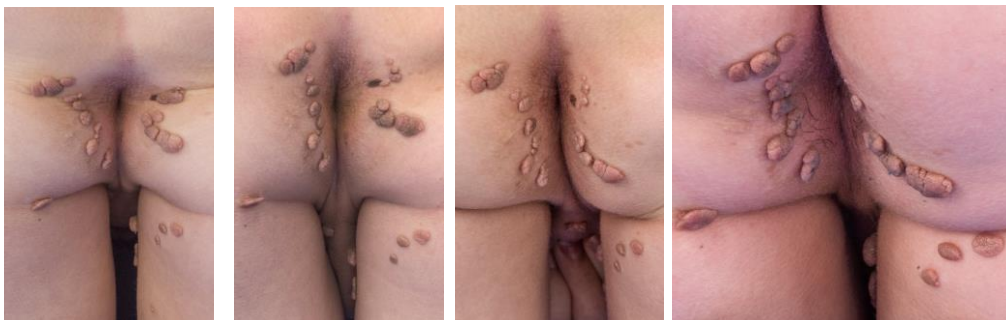

7/17

12/17

4/18

2/19

# M07 Right hand dorsum

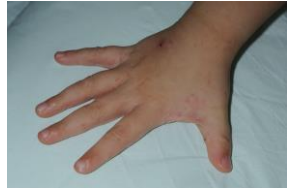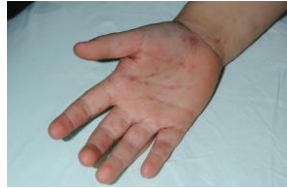

11/09

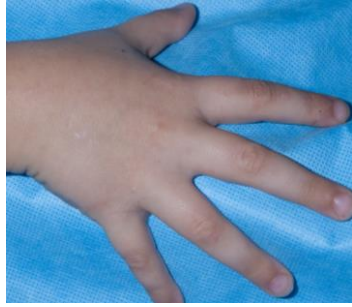

8/10

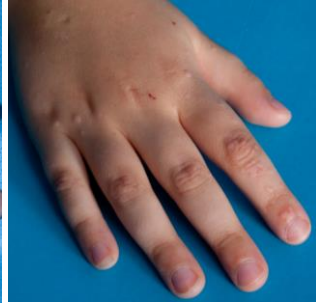

8/11

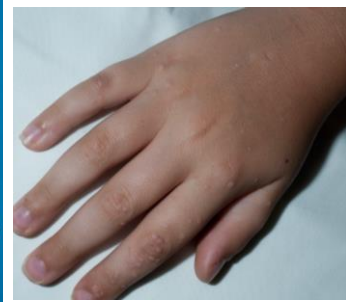

6/12

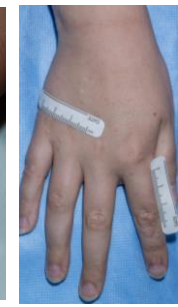

4/13

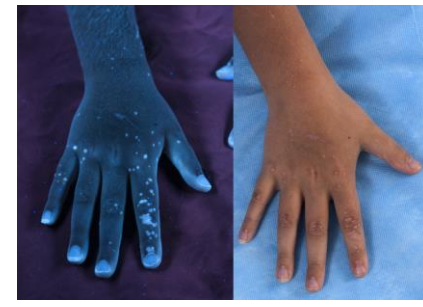

8/14

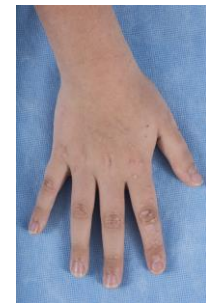

6/15

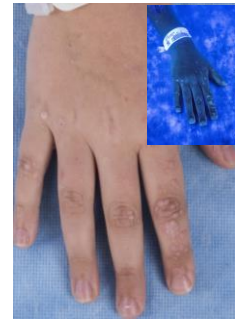

G d0

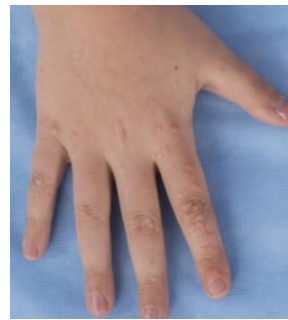

G M0

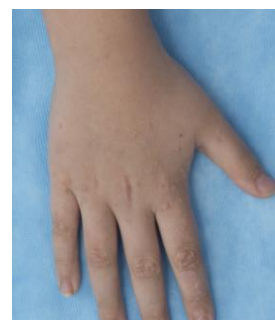

G M4

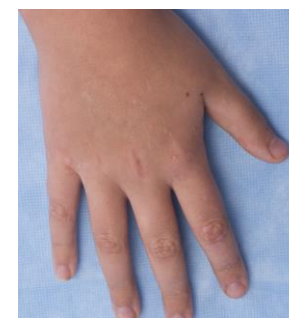

G M8

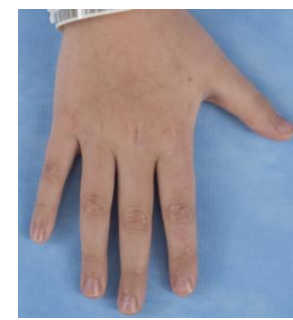

G M12

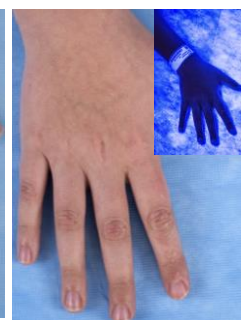

P M0  
Failed on P

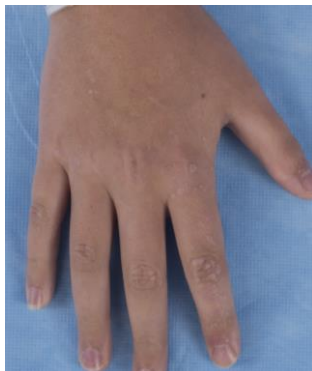

7/17

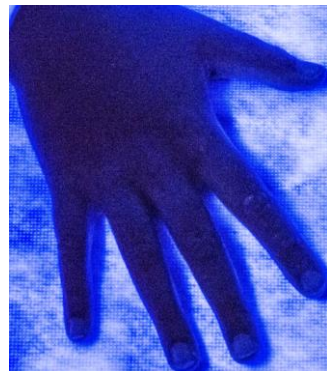

12/17

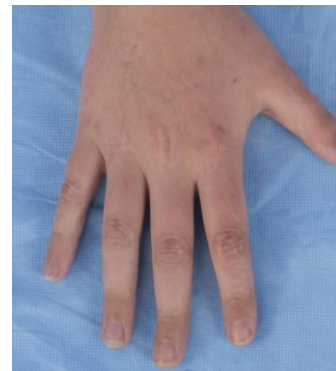

4/18



# M07 Left hand dorsum

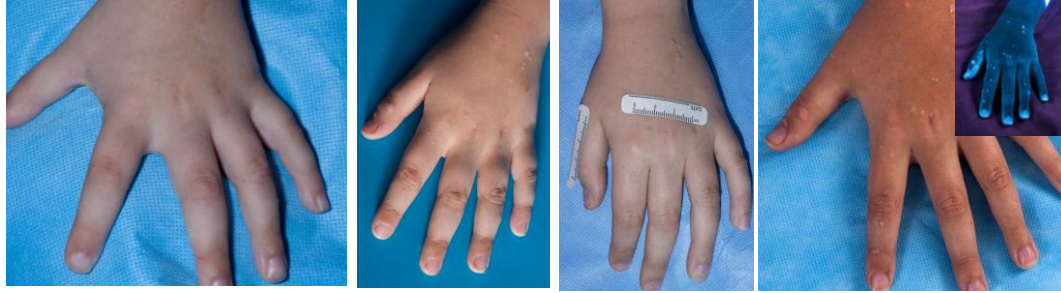

8/10

7/11

4/13

8/14

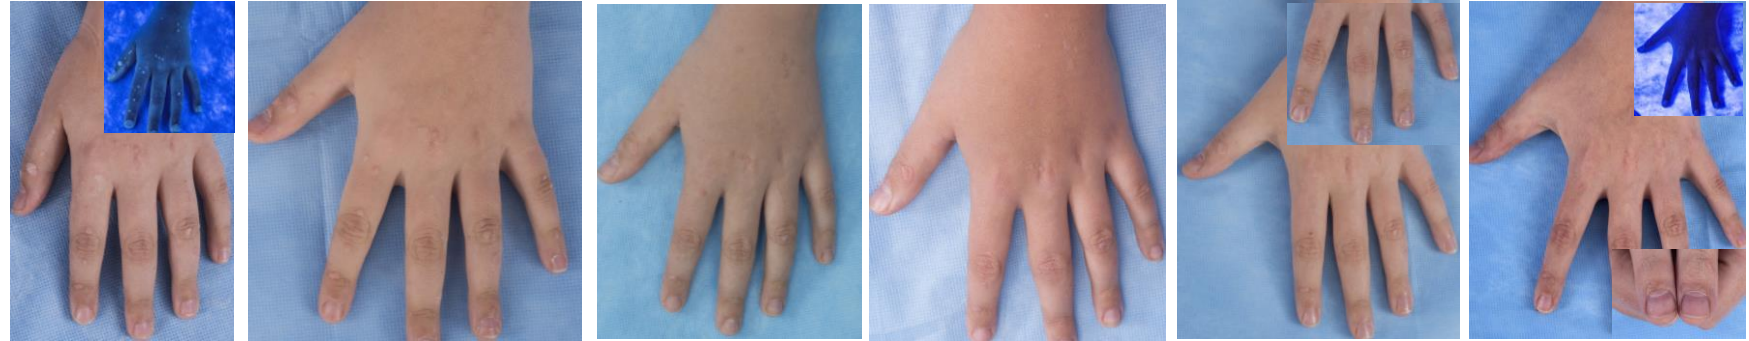

G d0

G M0

G M4

G M8

G M12

P M0  
Failed on P

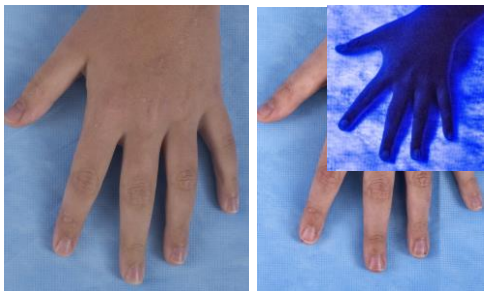

7/17

12/17

# M07

Left thumb

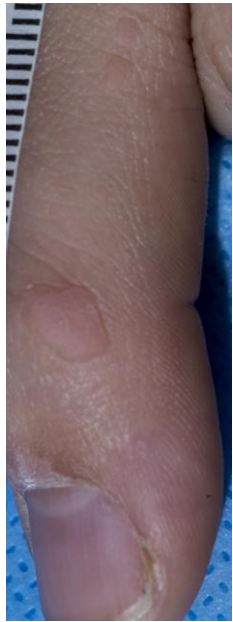

7/2013

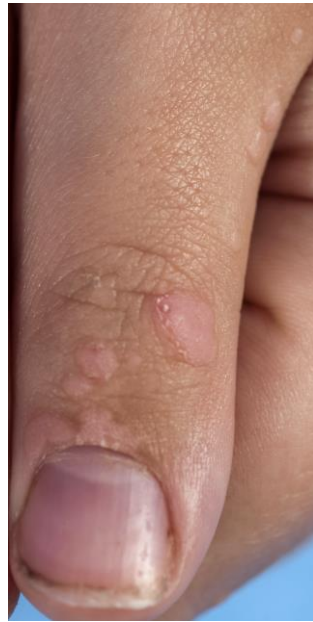

8/2014

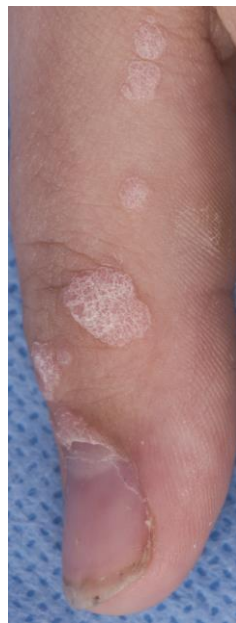

G d0 10/2015

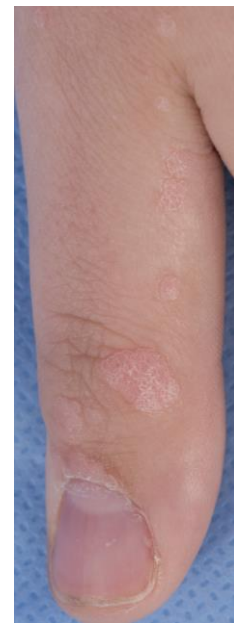

G M0

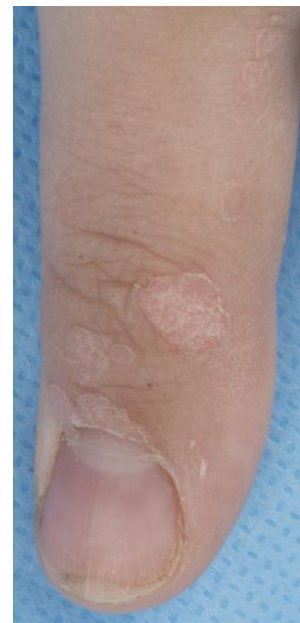

G M4

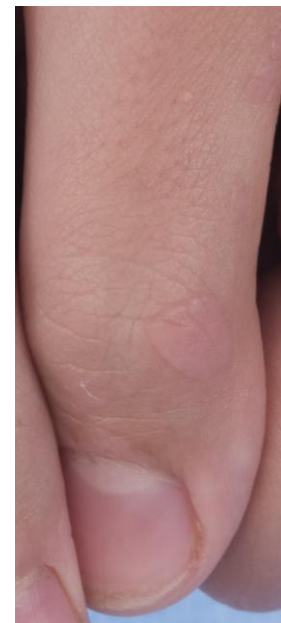

G M8

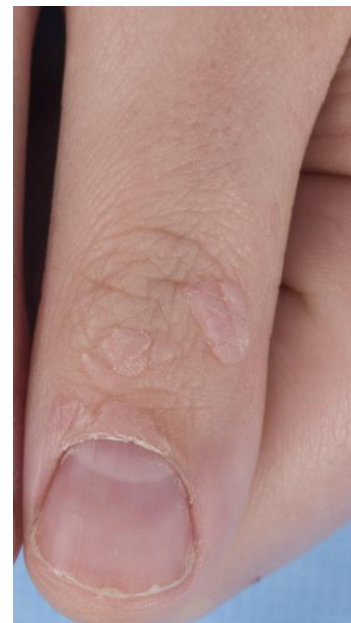

G M12

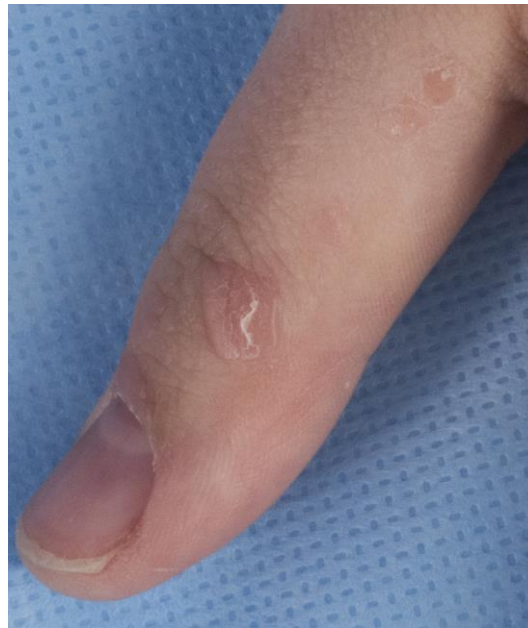

P M0 (failed on P)

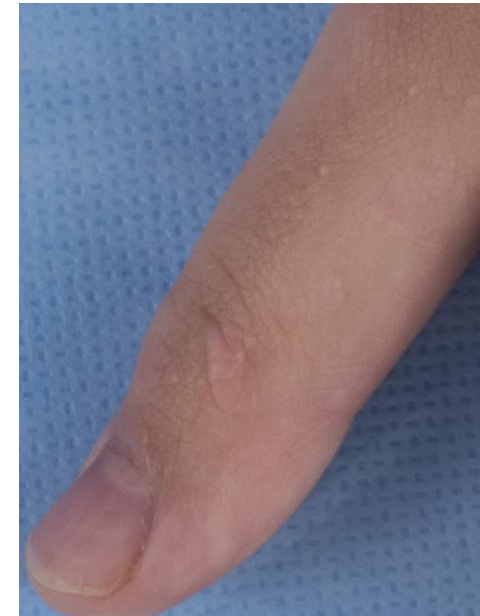

7/2017

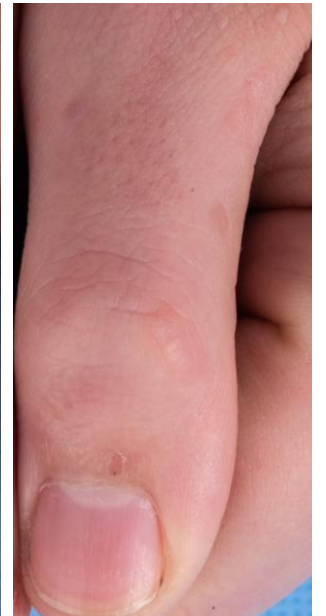

2/2019

# M07 Left foot dorsum

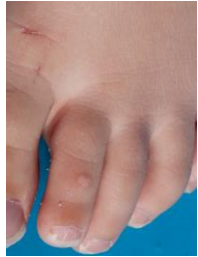

7/11

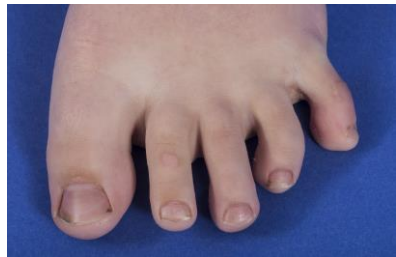

6/15

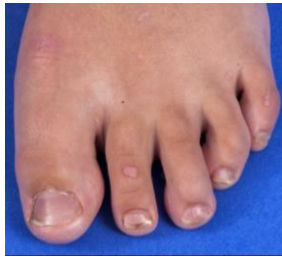

8/14

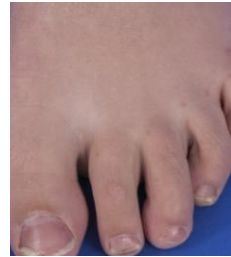

G d0

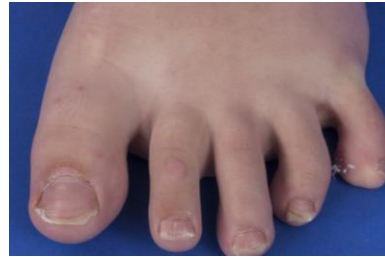

G M0

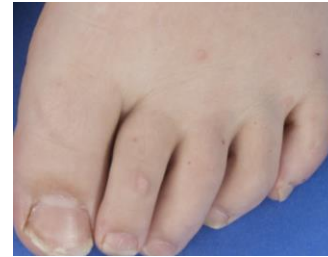

G M4

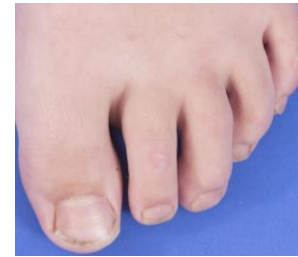

G M8

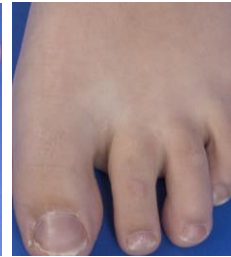

G M12

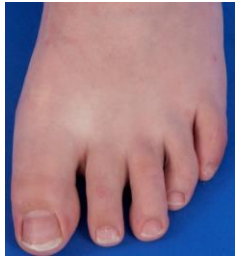

P M0

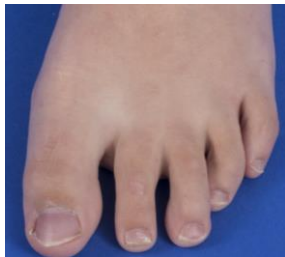

7/17

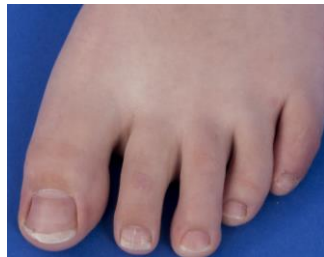

4/18

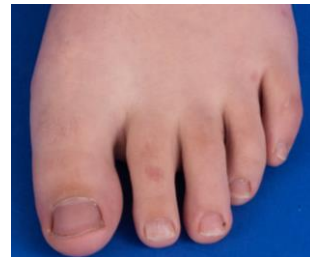

2/19

# M09 Left foot, plantar surface

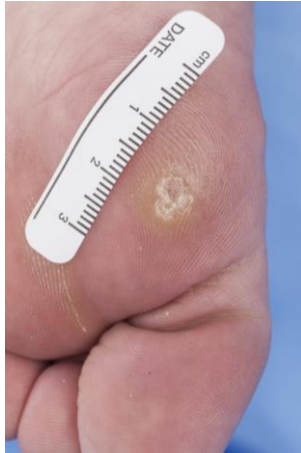

P d0 3/22/16  
(Failed on P)

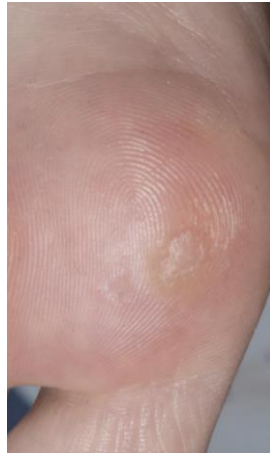

G d0

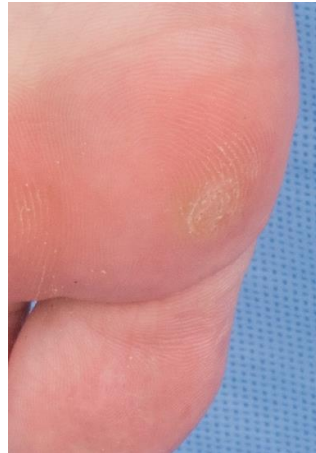

G M0

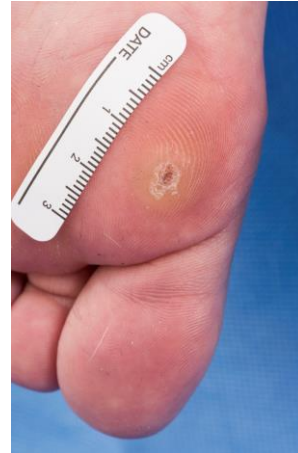

G M4

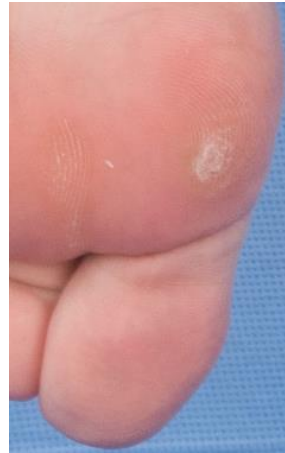

G M8

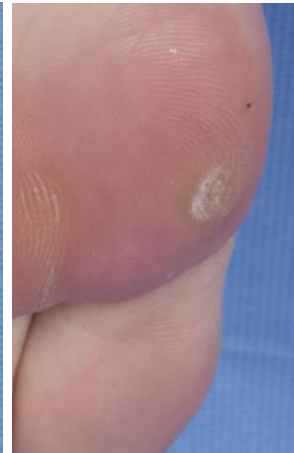

G M12

# M09 Right foot, plantar surface

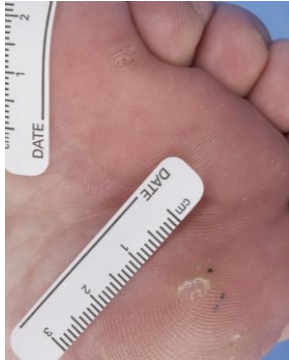

P d0  
(Failed on P)

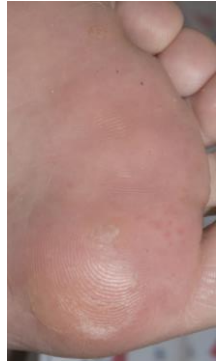

G d0

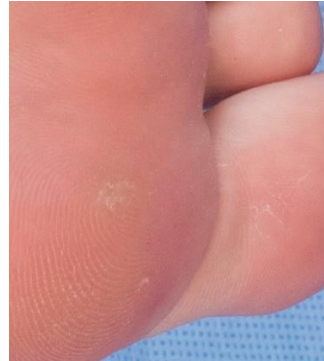

G M0

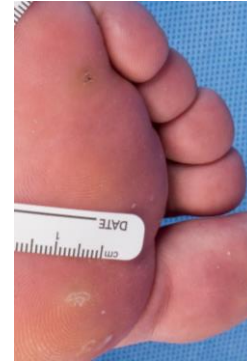

G M4

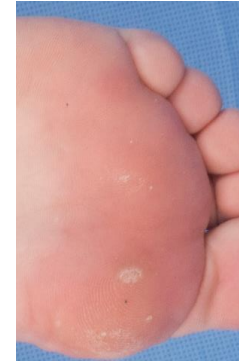

G M8

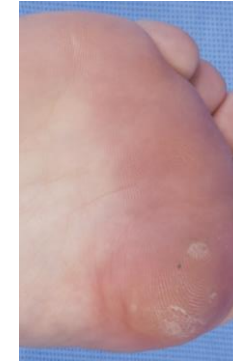

G M12

# M12 Left thumb

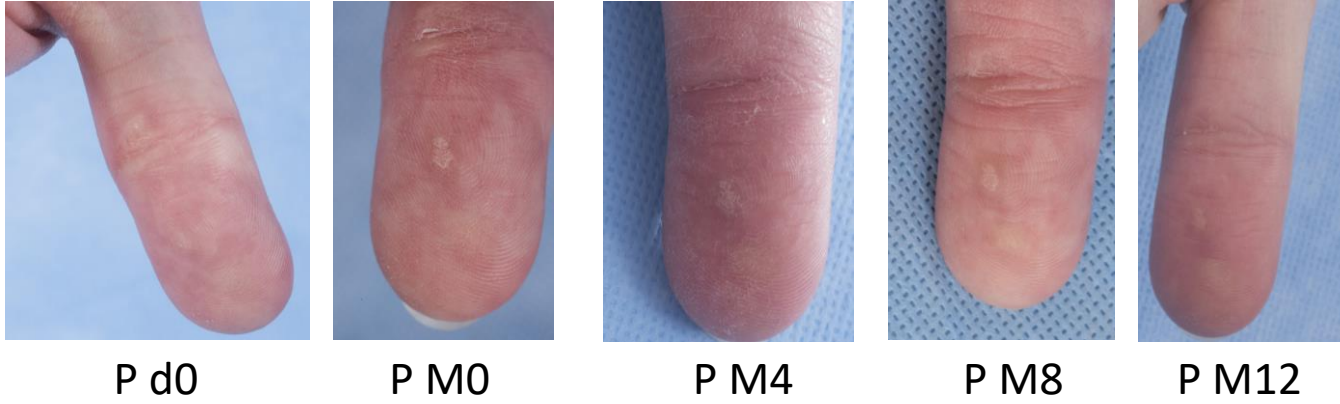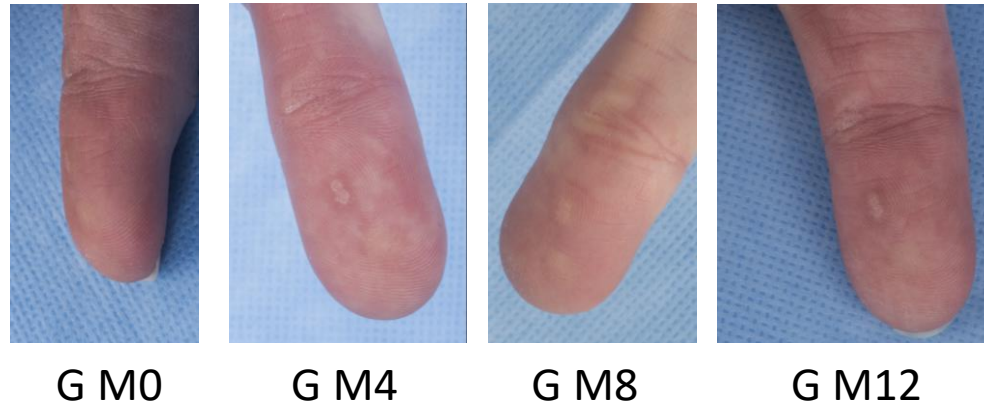

# M12 Right toes

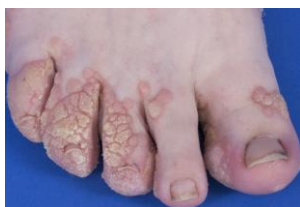

P d0  
5/25/16

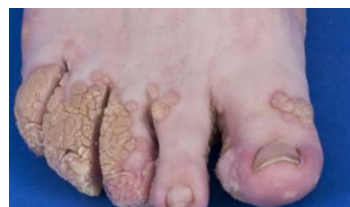

P M0

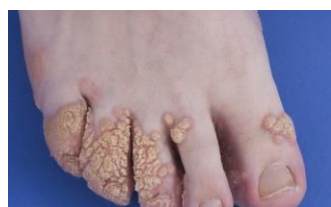

P M4

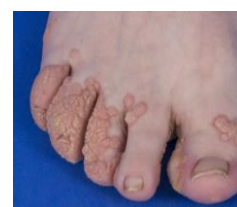

P M8

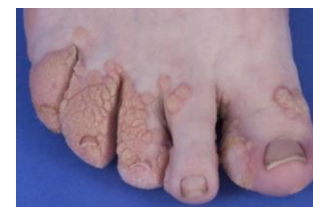

P M12

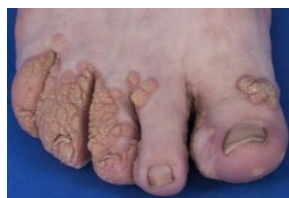

G M0

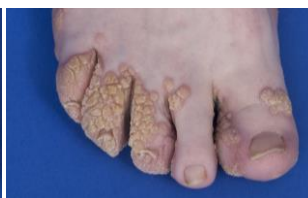

G M4

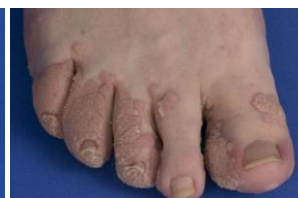

G M8

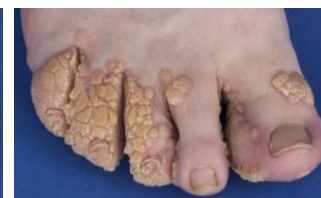

G M12  
11/28/18

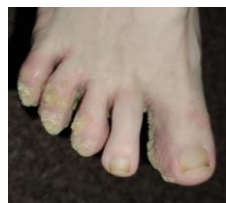

7/20

4/22

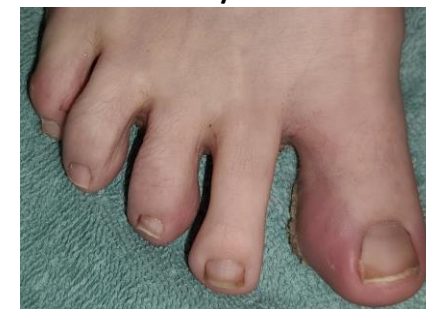

# M12 Right thumb, subungual region

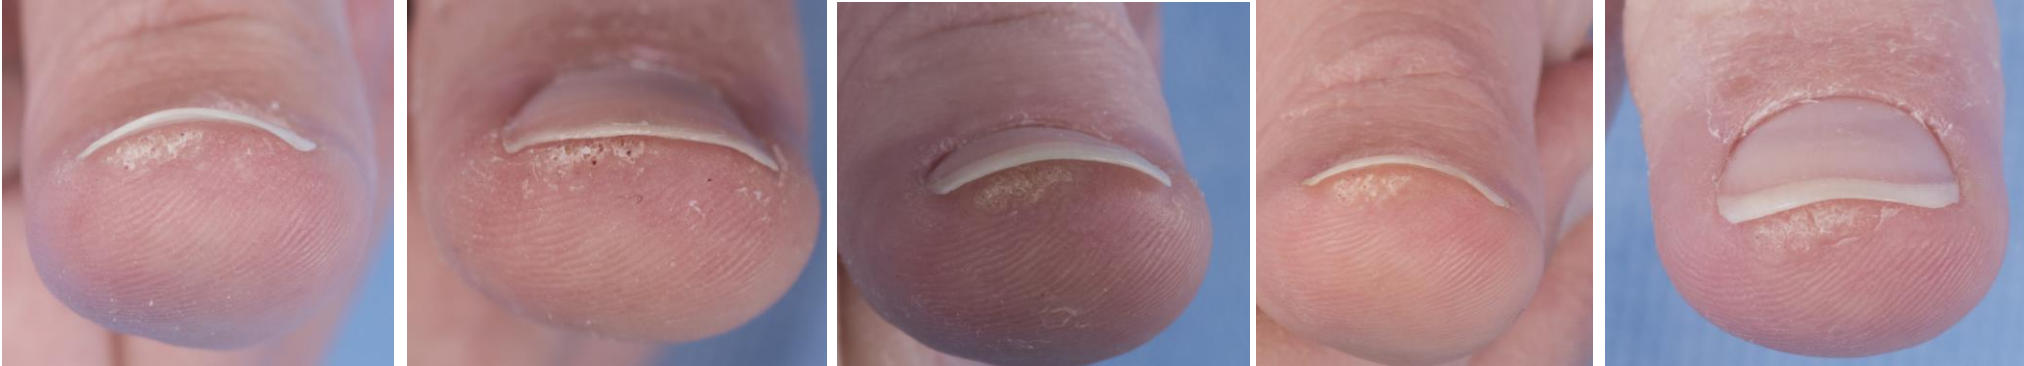

P d0

P M0

P M4

P M8

P M12

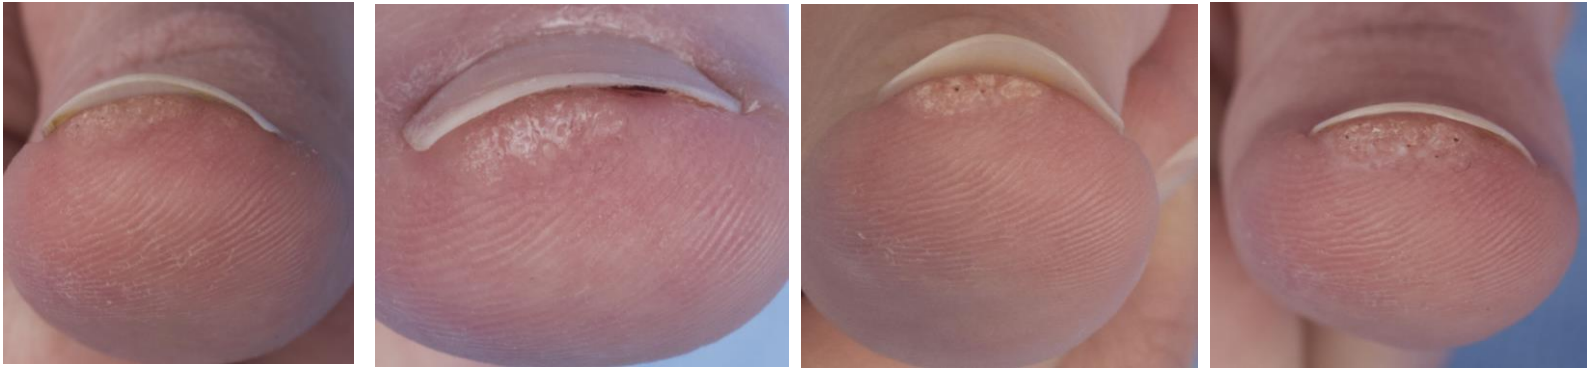

G M0

G M4

G M8

G M12



# M12 Right sole

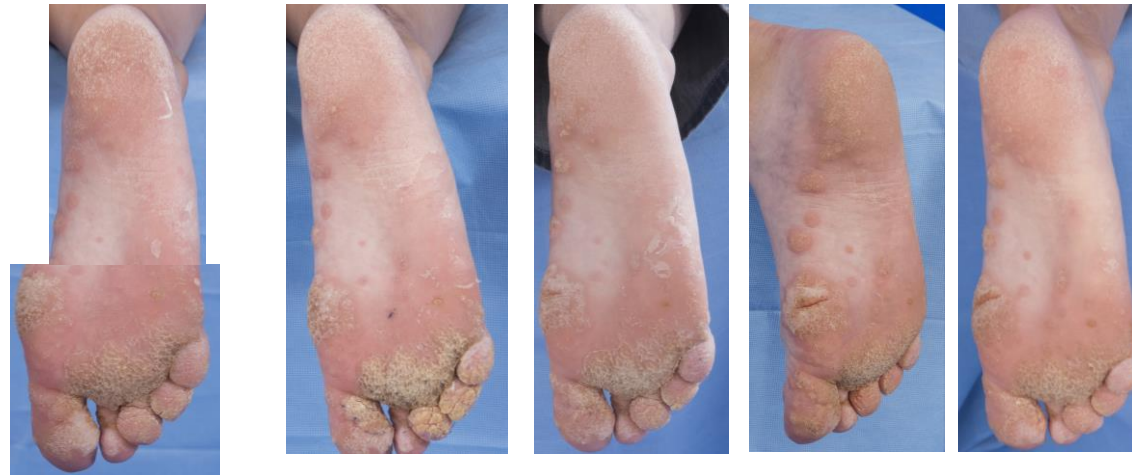

P d0

P M0

P M4

P M8

P M12

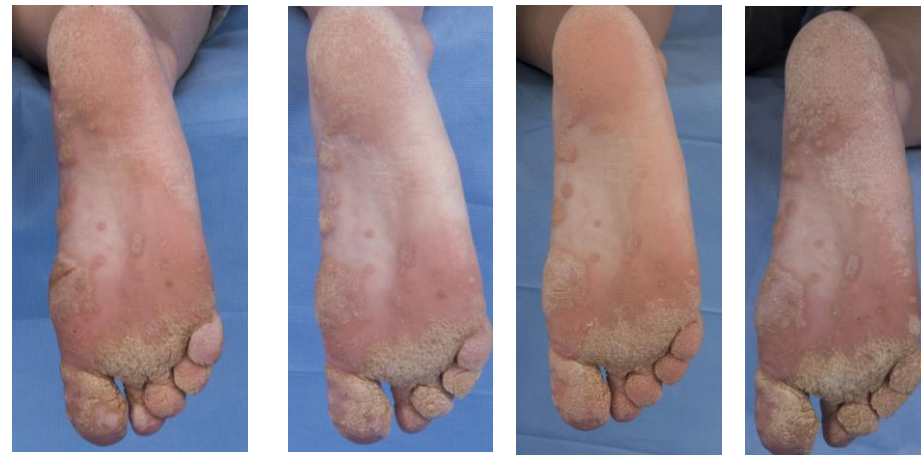

G M0

G M4

G M8

G M12

4/22

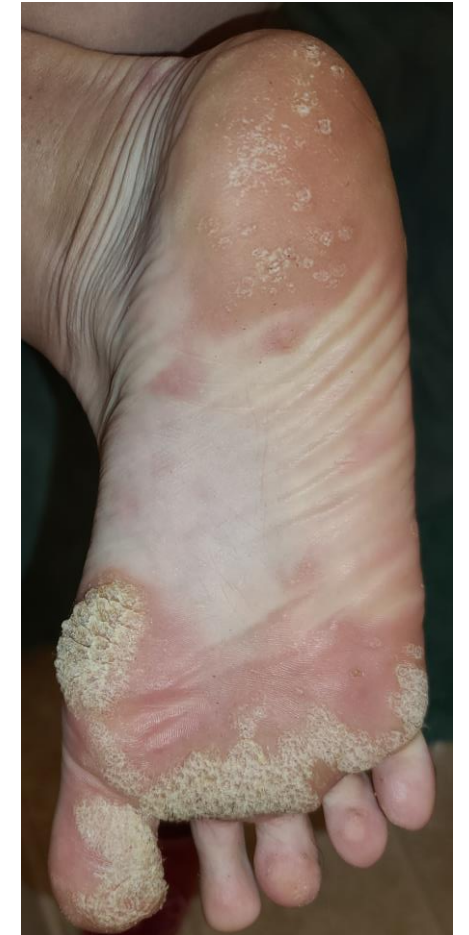

# M12 Left sole

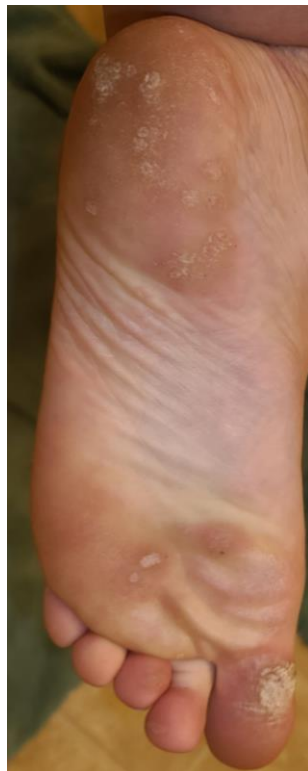

4/22

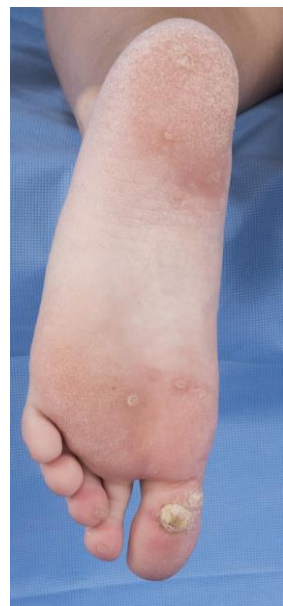

P M0

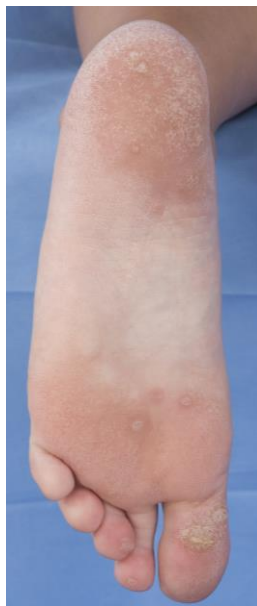

P d0

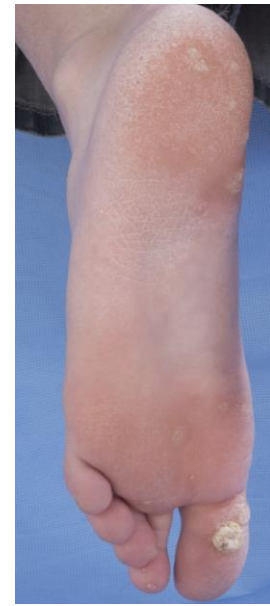

P M4

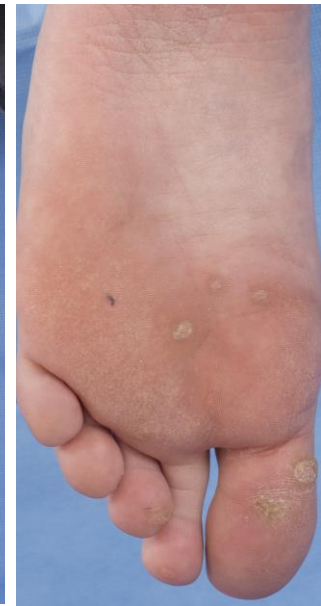

P M8

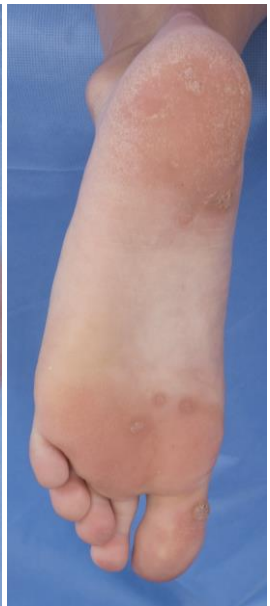

P M12

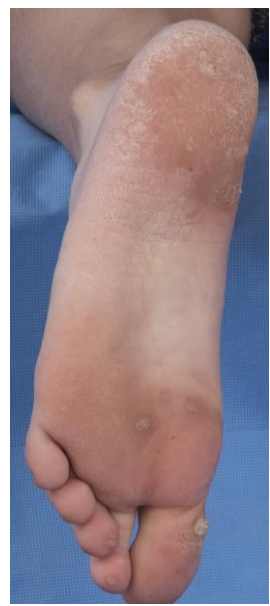

G M0

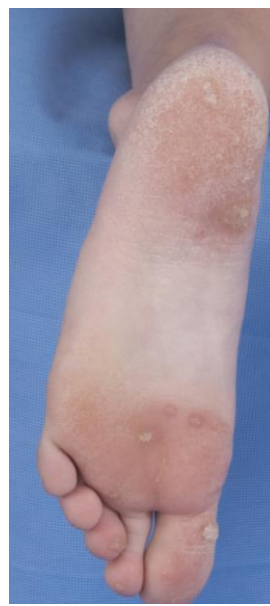

G M4

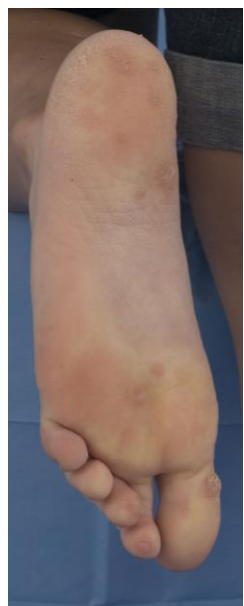

G M8

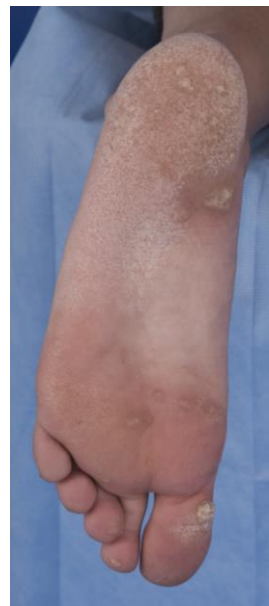

G M12

# M15 Right elbow

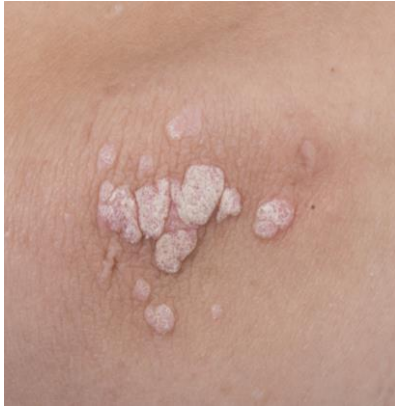

G d0

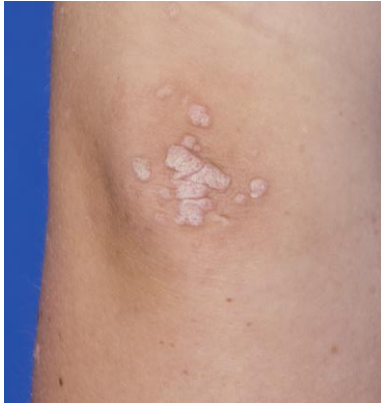

G M0

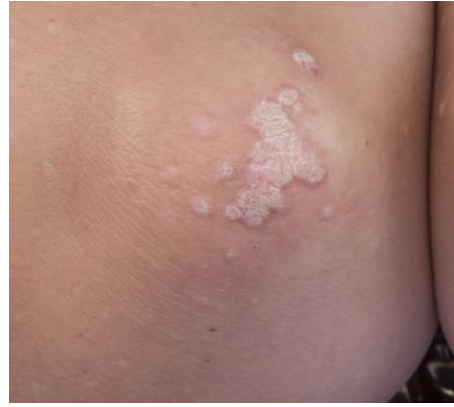

G M4

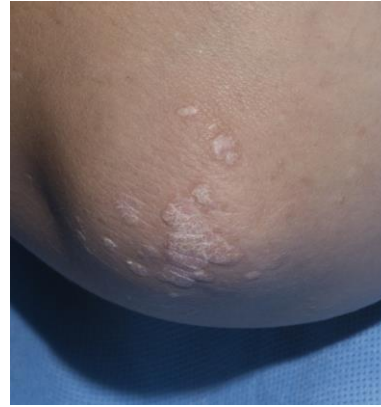

G M8

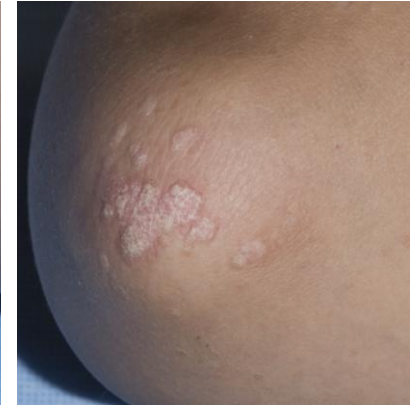

G M12

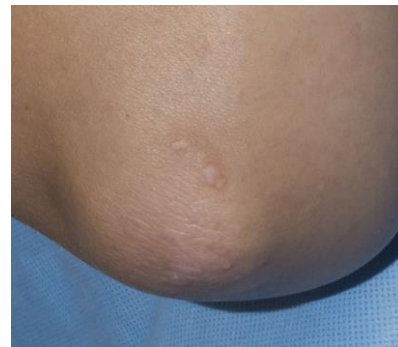

P M0

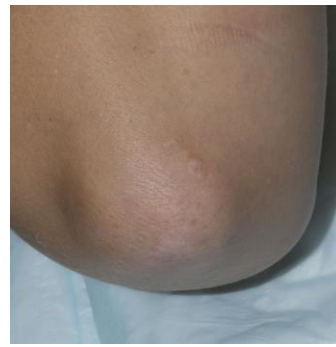

P M4

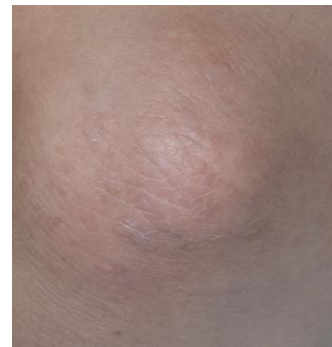

P M8

# M15 Left elbow

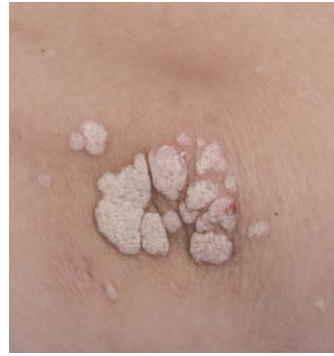

G d0

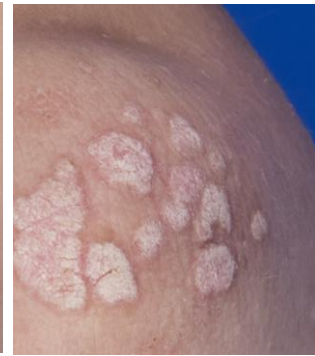

G M0

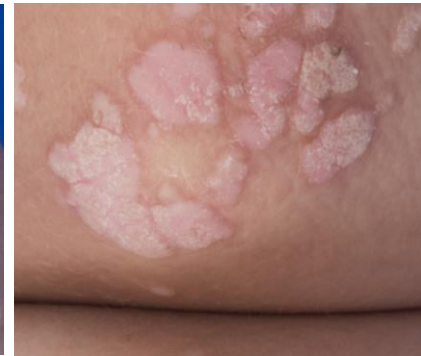

G M4

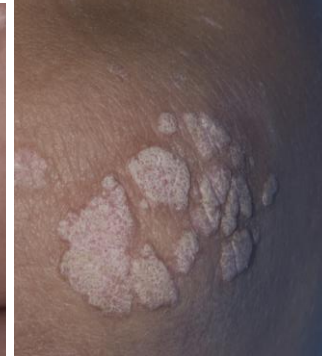

G M8

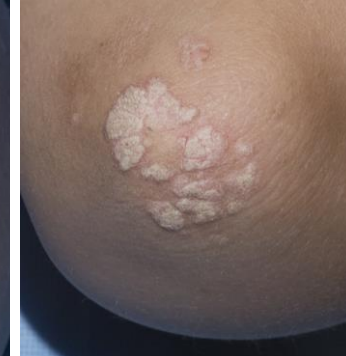

G M12

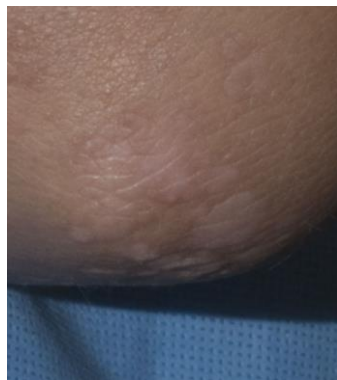

P M0

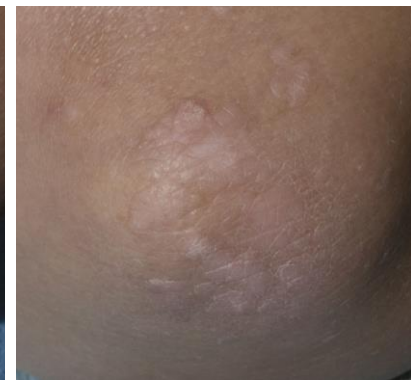

P M4

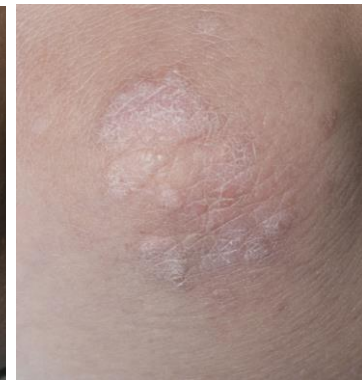

P M8

# M15 Right hand dorsum

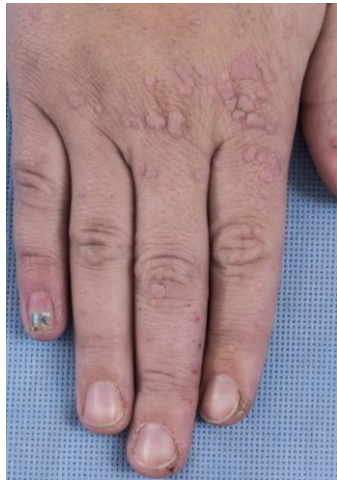

G d0

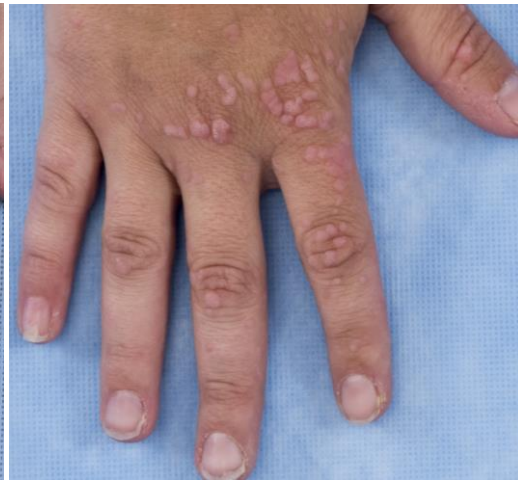

G M0

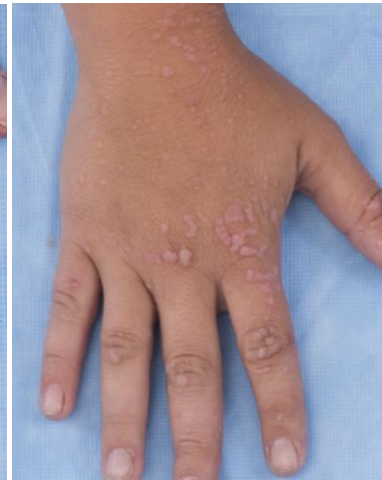

G M4

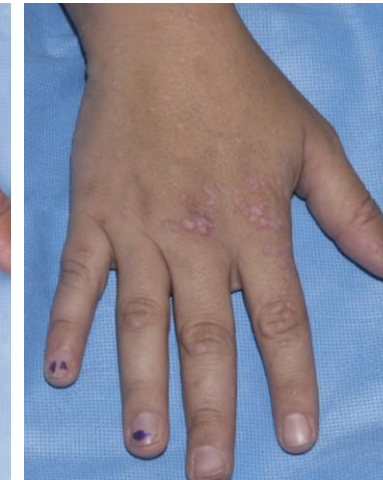

G M8

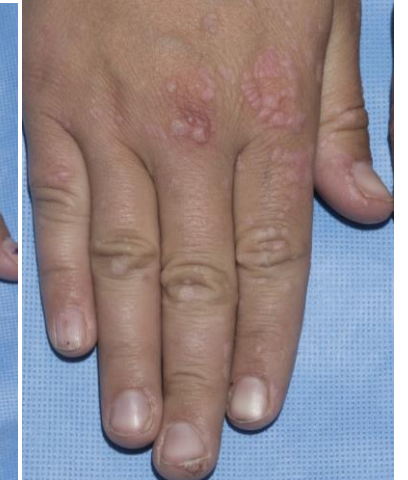

G M12

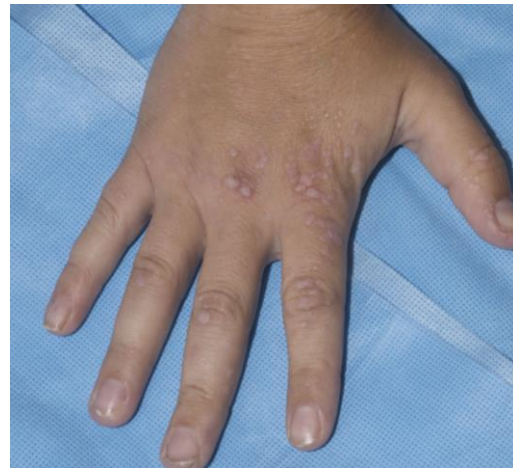

P M0

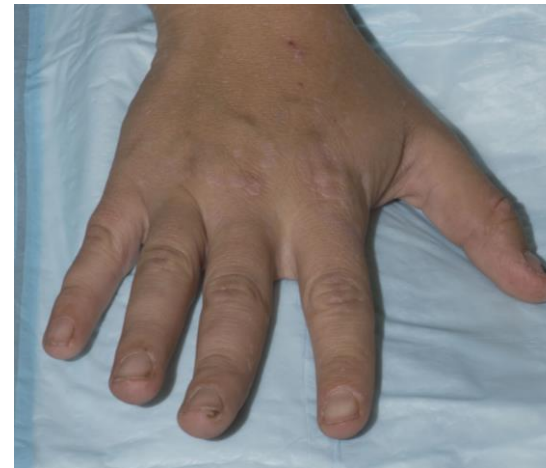

P M4

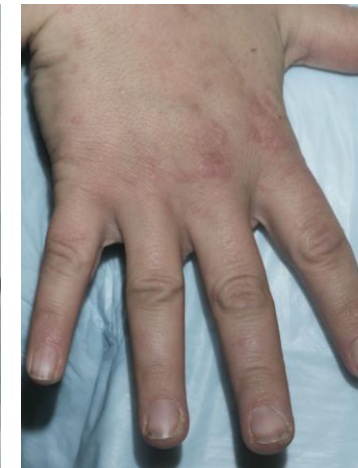

P M8

# M15 Left hand, dorsum

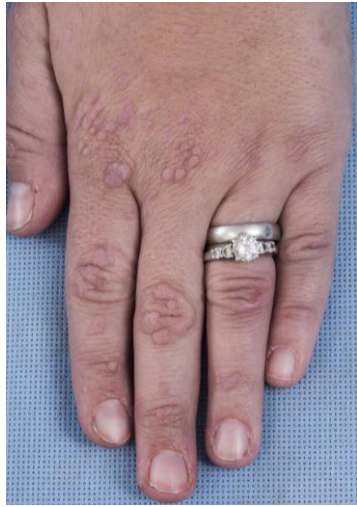

G d0

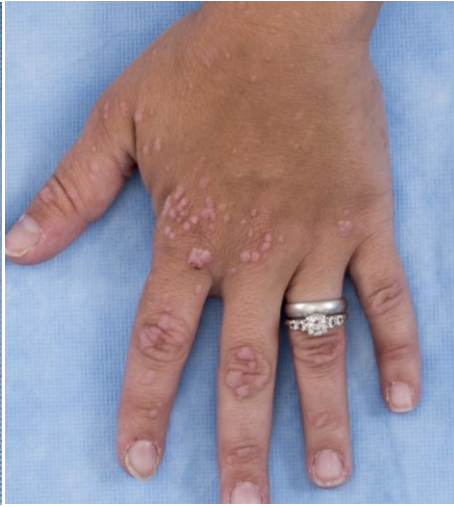

G M0

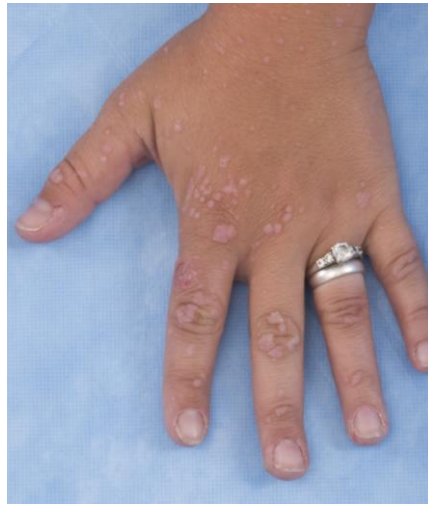

G M4

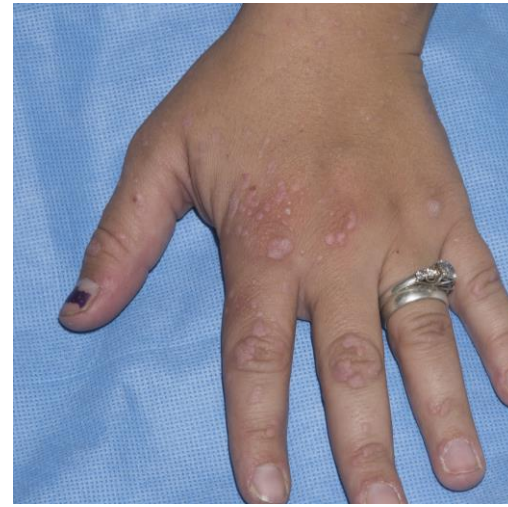

G M8

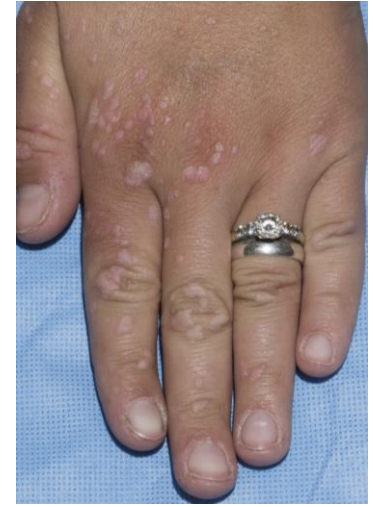

G 12

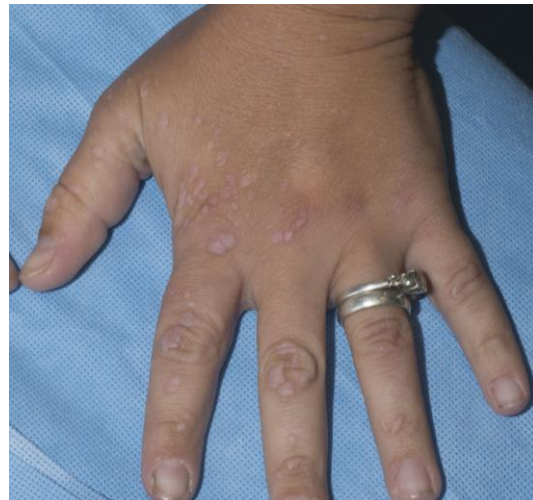

P M0

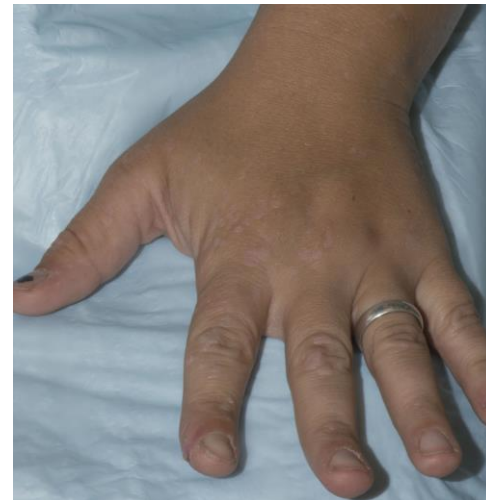

P M4

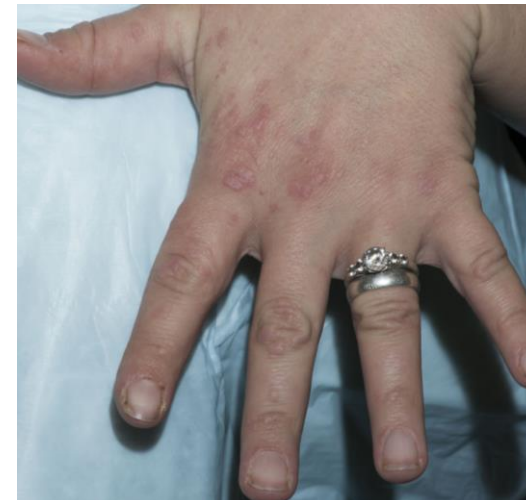

P M8

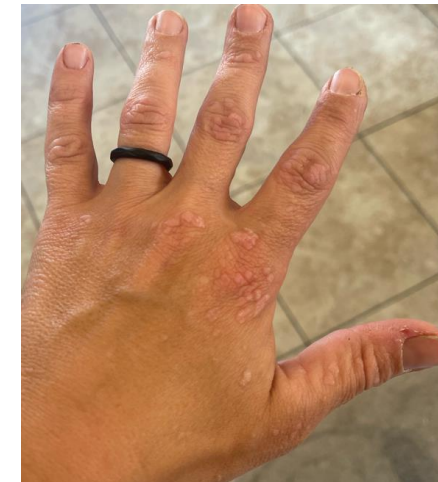

3/2022

# M15 Genitalia

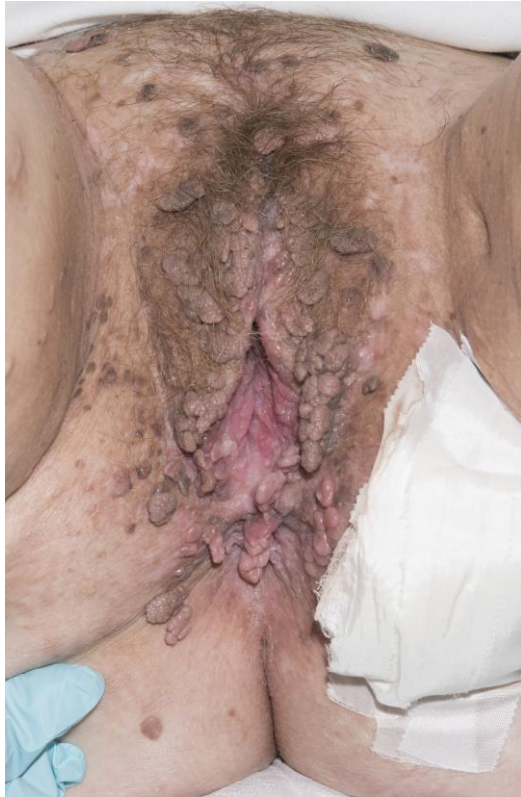

G d0

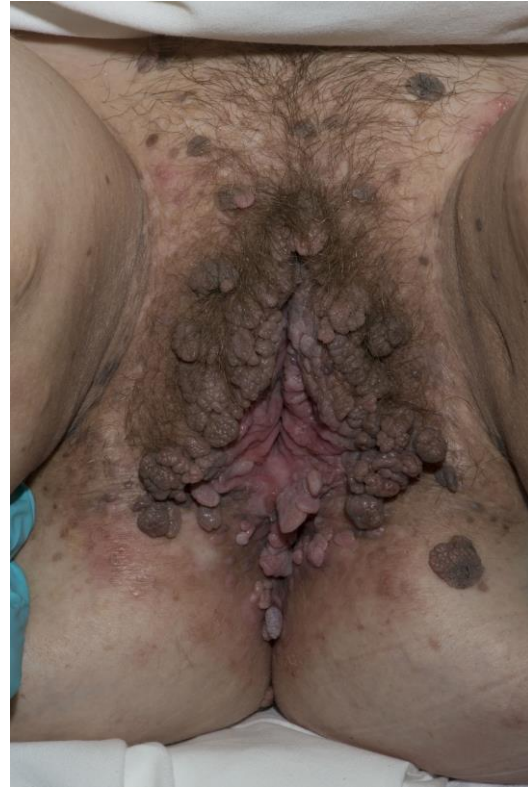

G M0

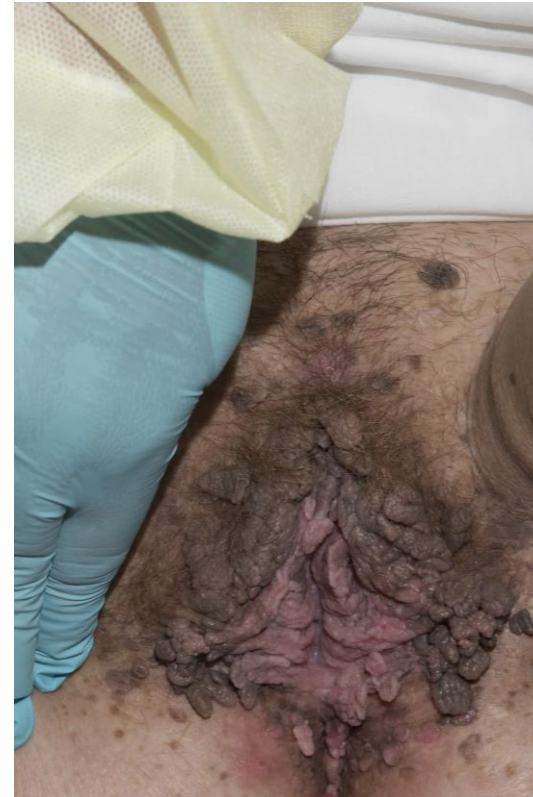

G M12

Post P na

# M17 Left second toe

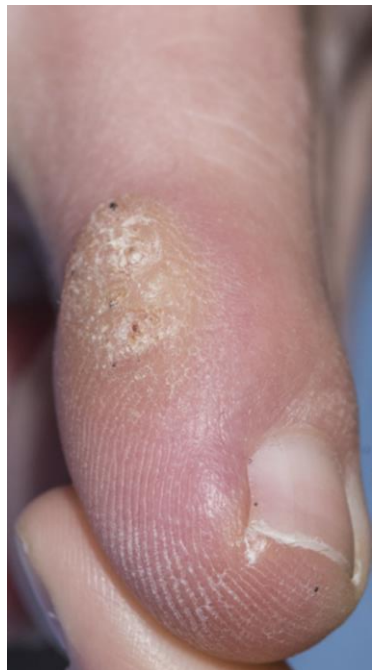

3/2016

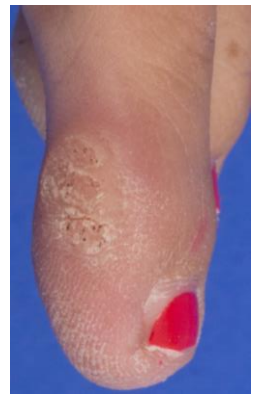

G d0  
7/17

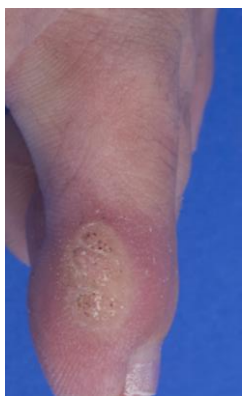

G M0

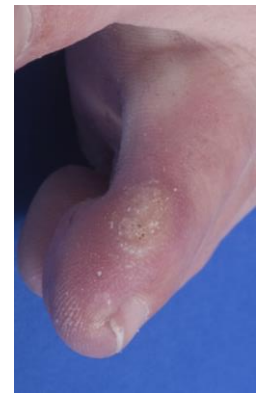

G M4

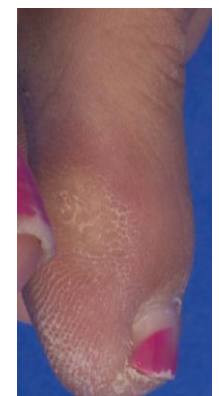

G M8

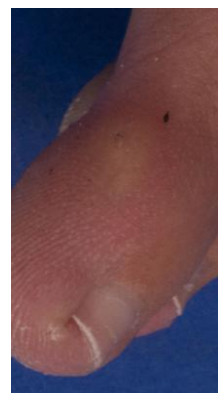

G M12

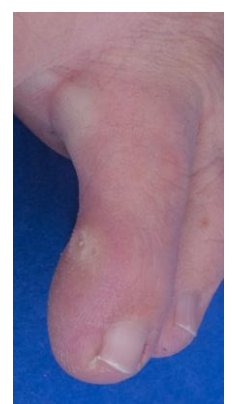

P M0

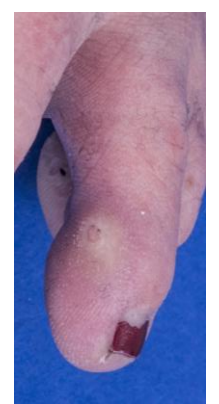

P M4



# M17 Right plantar region

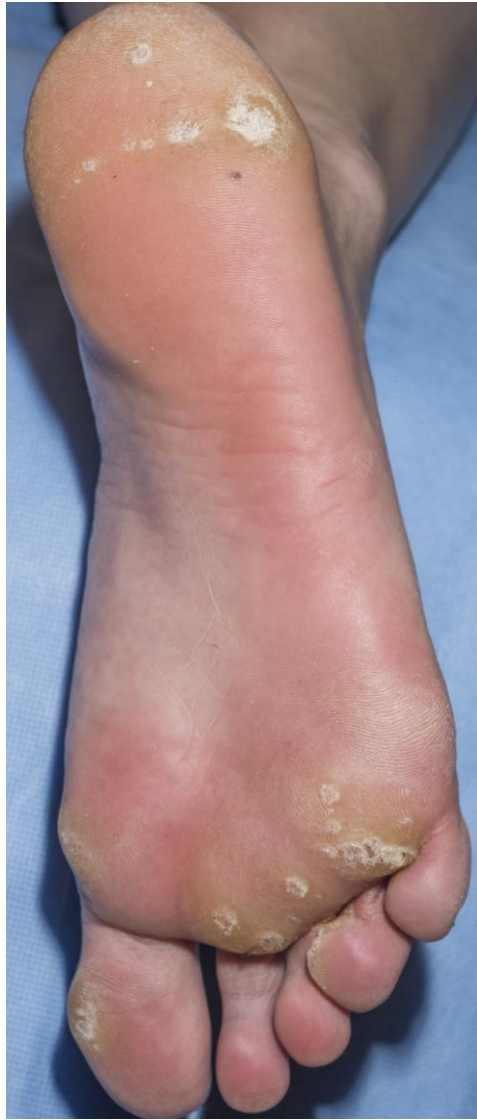

3/2016

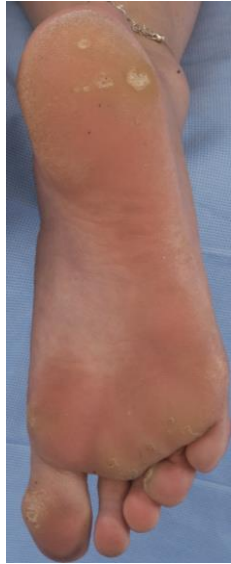

G d0

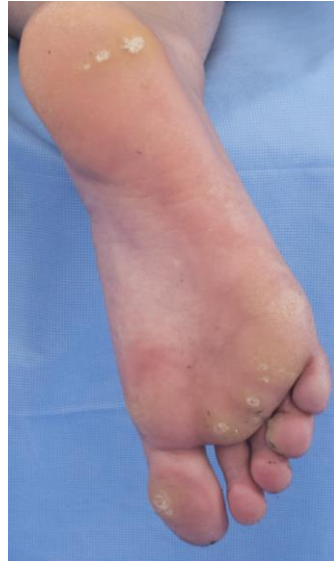

G M0

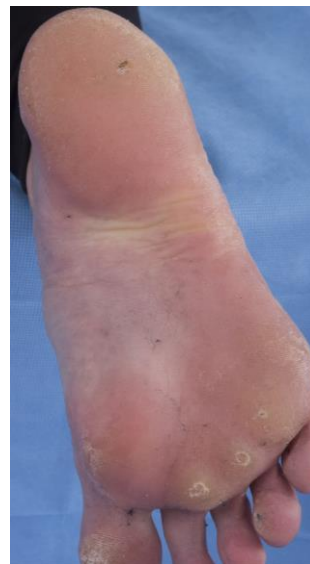

G M4

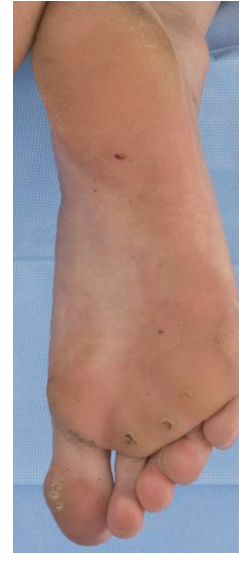

G M8

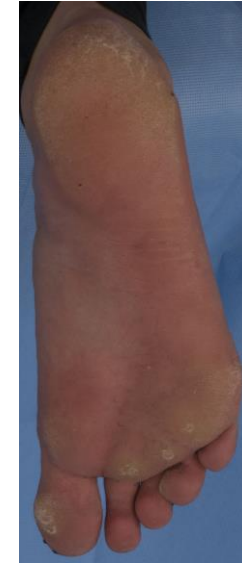

G M12

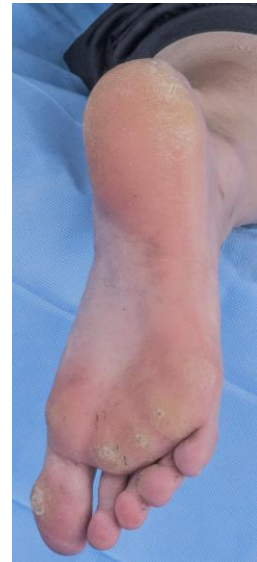

P M0

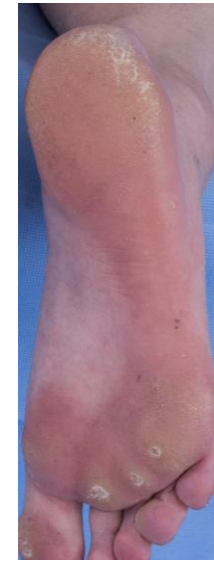

P M4

# M17 Left plantar region

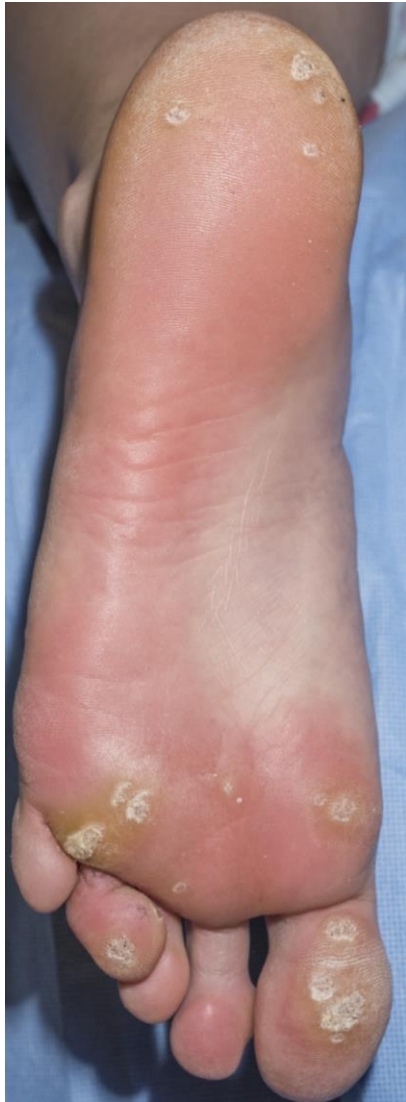

3/2016

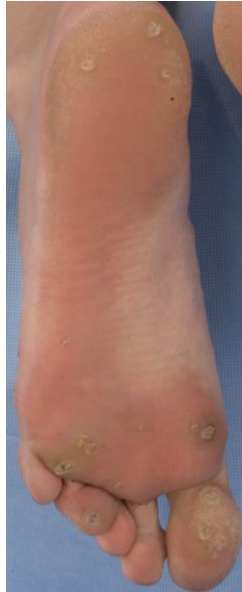

G d0

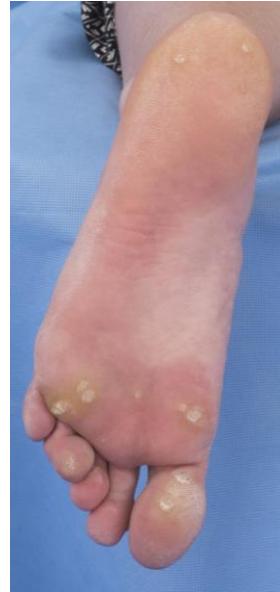

G M0

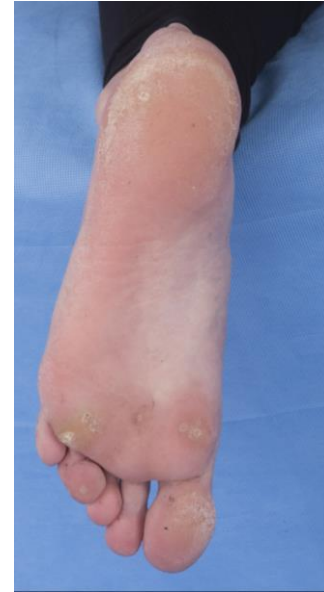

G M4

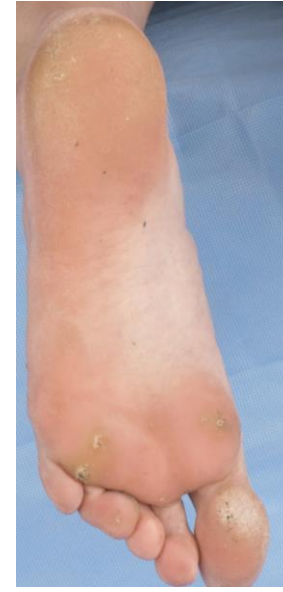

G M8

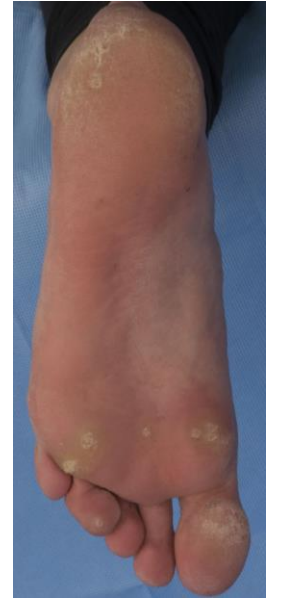

G M12

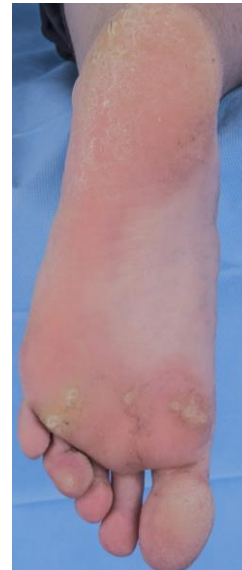

P M0

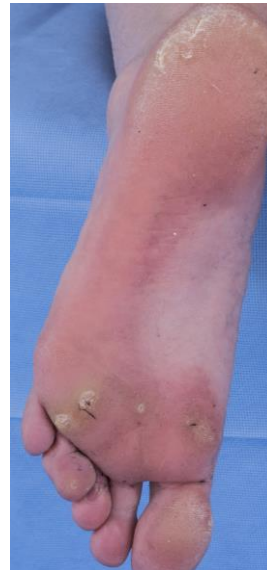

P M4

# M18 Left 2<sup>nd</sup> finger periungual area

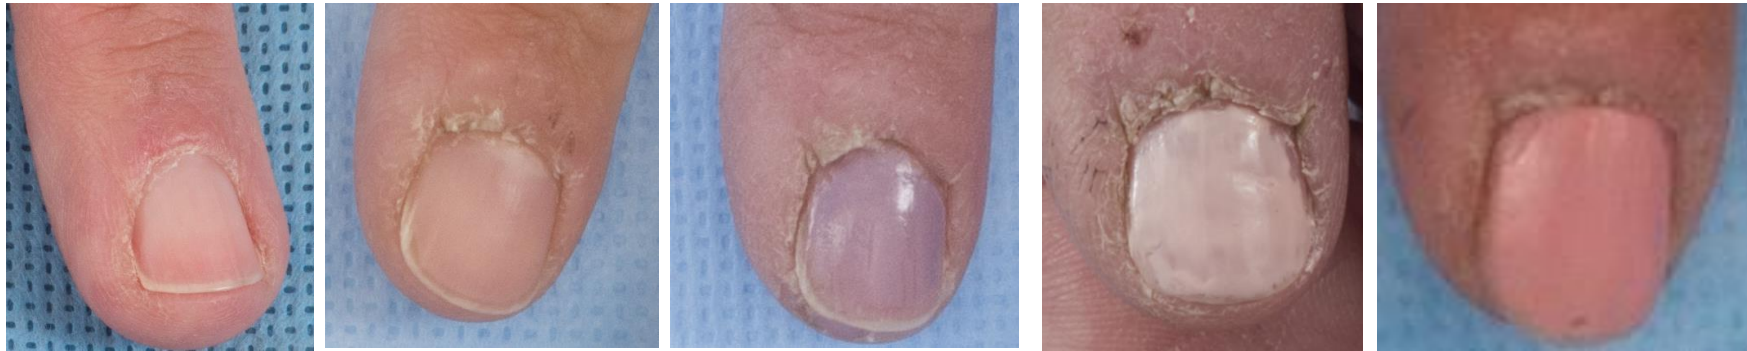

P d0

P M0

P M4

P M8

P M12

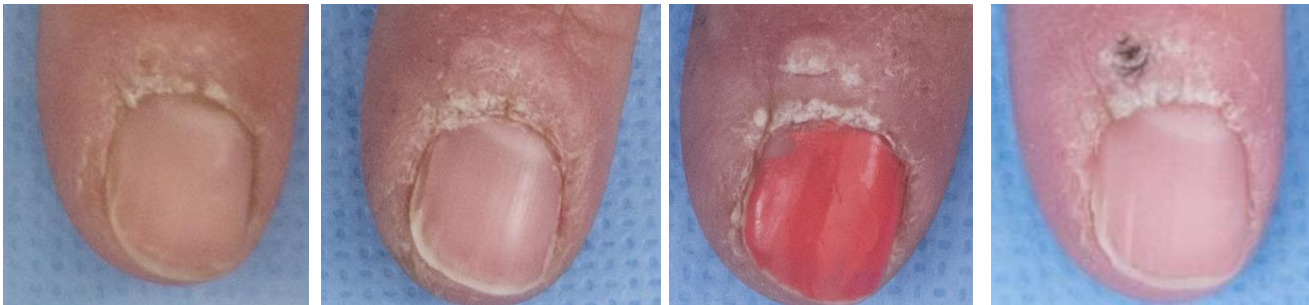

G M0

G M4

G M8

G M12

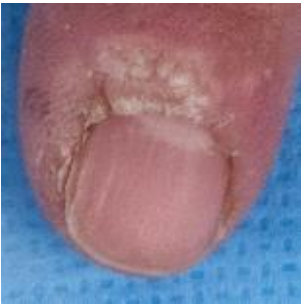

3/2020

# M18 Left 4<sup>th</sup> finger proximal nail fold area

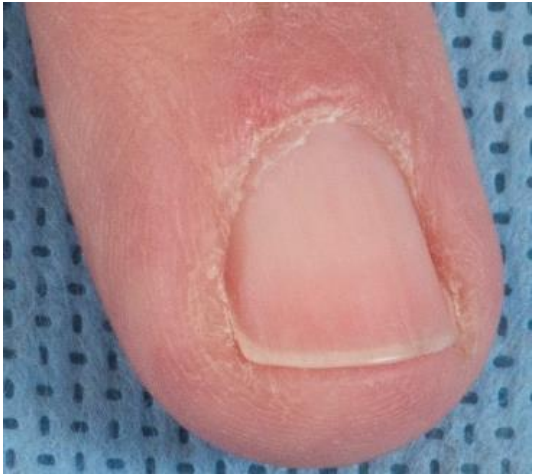

P d0

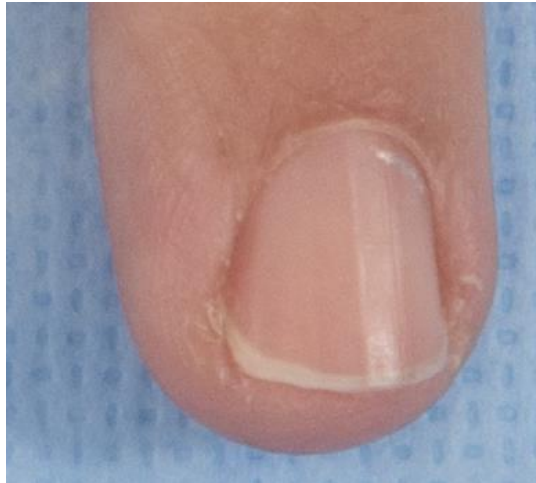

P M0

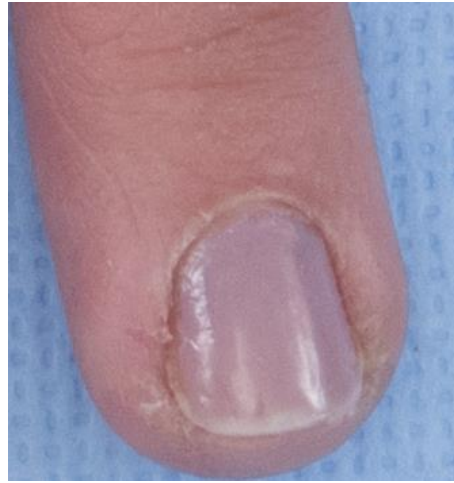

P M4

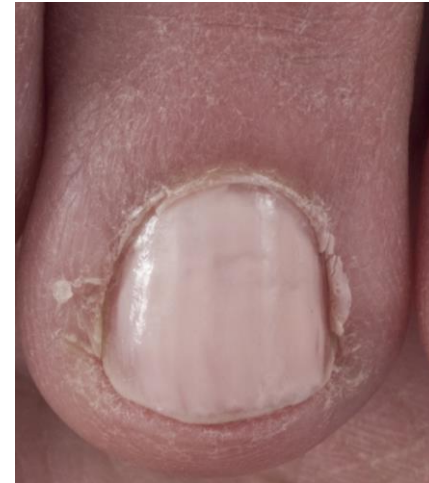

P M8

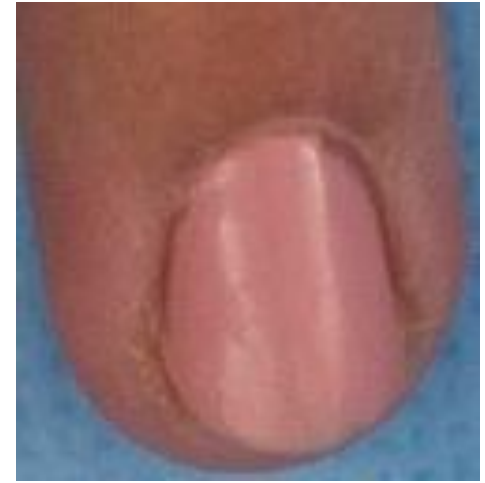

P M12

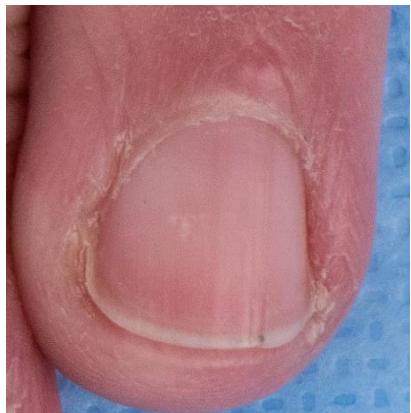

3/2020

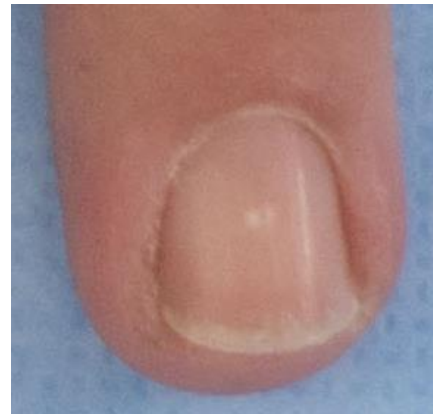

G M0

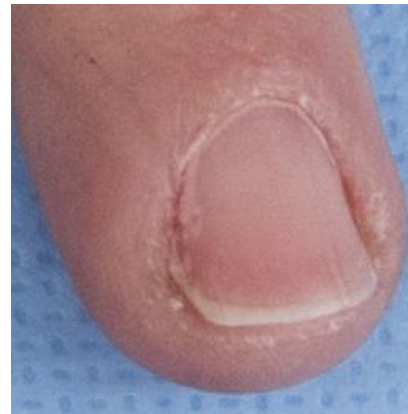

G M4

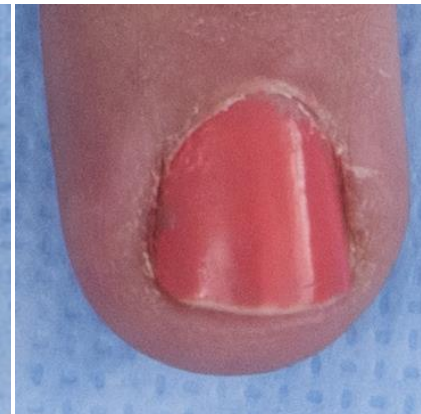

G M8

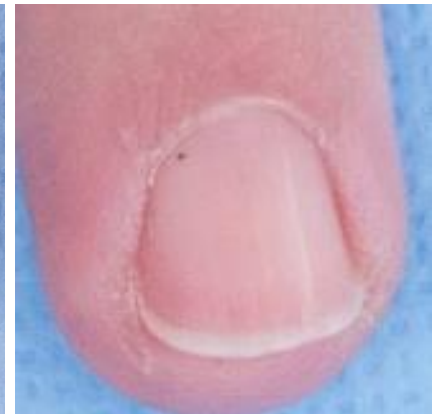

G M12

# M18 Right fingers 1-3, subungual area

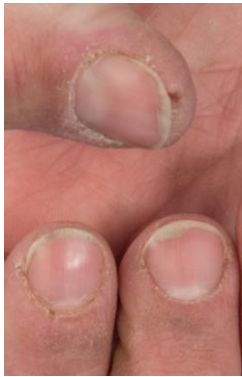

P d0

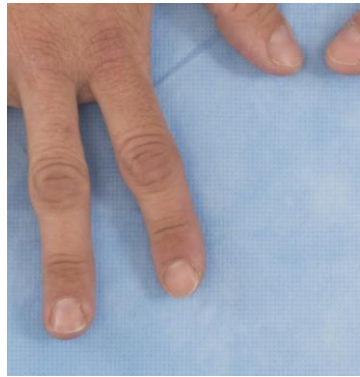

P M0

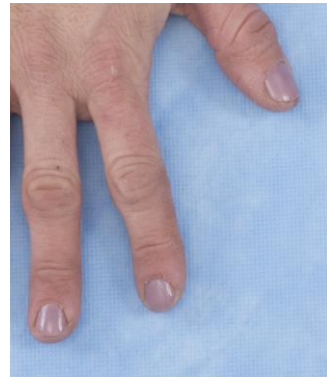

P M4

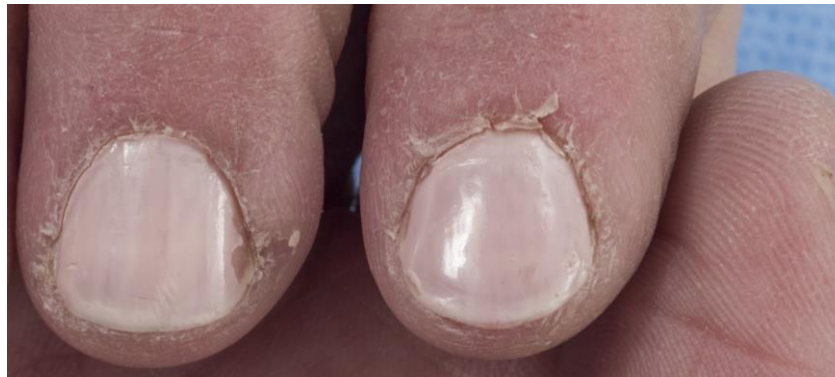

P M8

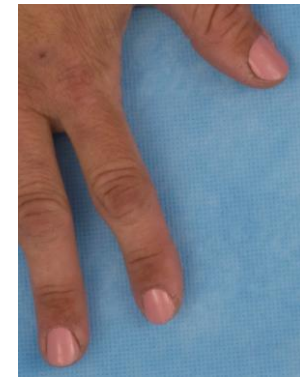

P M12

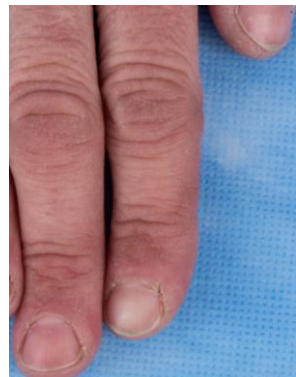

3/2020

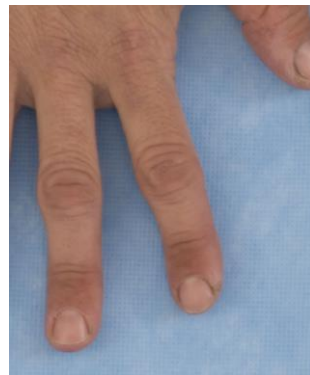

G M0

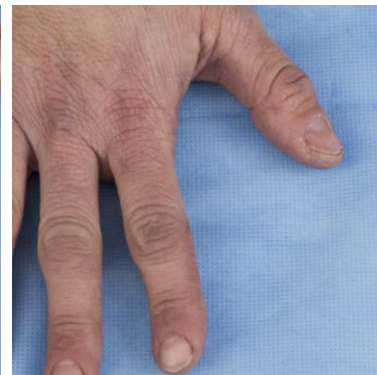

G M4

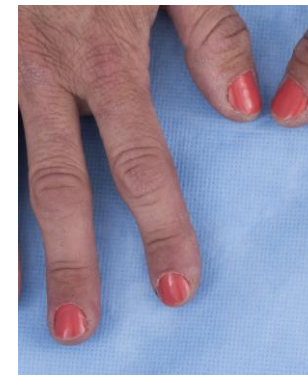

G M8

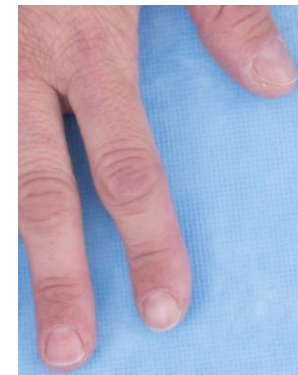

G M12
